# Supplementary material for: Formal [4 + 1] annulation of fluorinated sulfonium salt with cyclic unsaturated imines to access CF3-substituted pyrroles
Source: Royal Society of Chemistry journal article supplement (doi:10.1039/d1ob00218j), 2021-01-01

# Supplementary Information

## Formal [4+1] Annulation of Fluorinated Sulfonium Salt with Cyclic Unsaturated Imines to Access CF<sub>3</sub>-Substituted Pyrroles

Tao Chen,<sup>a</sup> Aoning Wang,<sup>a</sup> Linxue Zhang,<sup>a</sup> Chenlong Wei,<sup>a</sup> Juhui Huang,<sup>a</sup>  
Xiang Liu,<sup>\*,a</sup> and Zhenqian Fu<sup>\*,a</sup>

<sup>a</sup> Key Laboratory of Flexible Electronics (KLOFE) & Institute of Advanced Materials (IAM),  
Nanjing Tech University (NanjingTech), 30 South Puzhu Road, Nanjing 211816, China

E-mail: [iamzqfu@njtech.edu.cn](mailto:iamzqfu@njtech.edu.cn) ; [iamxliu@njtech.edu.cn](mailto:iamxliu@njtech.edu.cn)

|          |                                                                                                                                                                                                                                                                                                                                                                                                                |
|----------|----------------------------------------------------------------------------------------------------------------------------------------------------------------------------------------------------------------------------------------------------------------------------------------------------------------------------------------------------------------------------------------------------------------|
| <b>1</b> | General information                                                                                                                                                                                                                                                                                                                                                                                            |
| <b>2</b> | a) Procedure for the preparation of <b>1c-d</b> , <b>1g-o</b> and <b>4a-l</b> ( <b>4b</b> as an example).<br>b) General procedure for the reactions of <b>1</b> or <b>4</b> with <b>2</b> to synthesize product <b>3</b> or <b>5</b> ( <b>3a</b> as an example).<br>c) General procedure for the synthesis of product <b>6a-b</b> ( <b>5a</b> as an example) and <b>7</b> .<br>d) X-Ray Spectra of <b>3c</b> . |
| <b>3</b> | a) Characterizations of products.<br>b) References.                                                                                                                                                                                                                                                                                                                                                            |
| <b>4</b> | <sup>1</sup> H, <sup>13</sup> C and <sup>19</sup> F NMR spectra.                                                                                                                                                                                                                                                                                                                                               |

## 1. General Information

Commercially available materials were purchased from Alfa Aesar and Sigma-Aldrich. Toluene and DCM was dried over Pure Solv solvent purification system. THF was distilled over sodium. Other solvents were dried over 4Å molecular sieve prior use. Proton nuclear magnetic resonance ( $^1\text{H}$  NMR) spectra were recorded on a Bruker (400 MHz) spectrometer. Chemical shifts were recorded in parts per million (ppm,  $\delta$ ) relative to tetramethylsilane ( $\delta$  0.00) or chloroform ( $\delta$  = 7.26, singlet).  $^1\text{H}$  NMR splitting patterns are designated as singlet (s), doublet (d), triplet (t), quartet (q), dd (doublet of doublets), m (multiplets), and etc. All first-order splitting patterns were assigned on the basis of the appearance of the multiplet. Splitting patterns that could not be easily interpreted are designated as multiplet (m) or broad (br). Carbon nuclear magnetic resonance ( $^{13}\text{C}$  NMR) spectra were recorded on a Bruker (400 MHz) (100 MHz) spectrometer.  $^{19}\text{F}$  NMR chemical shifts were determined relative to  $\text{CFCl}_3$  as the external standard. High resolution mass spectral analysis (HRMS) was performed on a Waters Q-TOF Premier Spectrometer. Analytical thin-layer chromatography (TLC) was carried out on Merck 60 F254 pre-coated silica gel plate (0.2 mm thickness).

## 2. General procedure

**1a-b**<sup>[1]</sup> and **1e-f**<sup>[2]</sup> were synthesized according to the literature. **1c-d**, **1g-o** and **4a-l** were synthesized according to the procedure a). The product **3a-o** or **5a-l** were synthesized according to the procedure b). Diphenyl(2,2,2-trifluoroethyl)sulfonium triflate **2** were synthesized according to the literature.<sup>[3]</sup>

### a) Procedure for the preparation of **1c-d**, **1g-o** and **4a-l** (**4b** as an example).

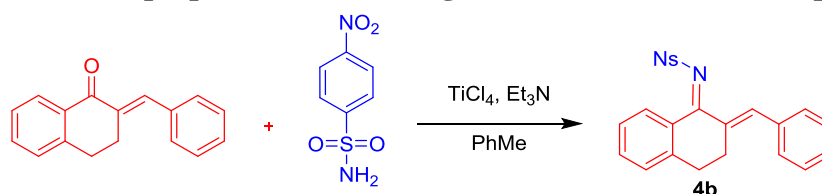

To the solution of chalcone (1.0 equiv. 3.0 mmol) and arylsulfonamide (1.5 equiv.) in dry  $\text{PhMe}$  (15 mL) was dropwise added  $\text{TiCl}_4$  (1.5 equiv.) and  $\text{Et}_3\text{N}$  (2.0 equiv.) at 0 °C over 10 minutes. The reaction mixture was heated at reflux overnight. The solution was cooled to room temperature, quenched with water (20 mL), and extracted with DCM (3 × 30 mL). The combined organic phase was dried over  $\text{MgSO}_4$  and concentrated. The residue was purified by flash chromatography on silica gel column ( $\text{EtOAc}/\text{hexane} = 1:10$  as eluent) to afford the substrate **4b** as a yellow solid up to 80% yield.

### b) General procedure for the reactions of **1** or **4** with **2** to synthesize product **3** or **5** (**3a** as an example):

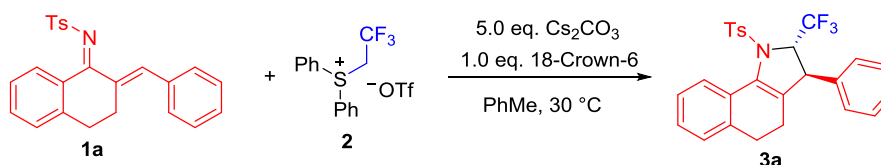

To a dried 10 mL Schlenk tube equipped with a magnetic stir bar was added **1a** (0.10 mmol, 38.7 mg), **2** (0.15 mmol, 62.8 mg),  $\text{Cs}_2\text{CO}_3$  (0.50 mmol, 163.0 mg), 18-Crown-6 (0.10 mmol, 26.5 mg) and 3.0 equiv. water. To this mixture was added  $\text{PhMe}$  (1.0 mL) by via a micro syringe, then the reaction mixture was stirred at 30 °C until **1a** disappeared (detected by TLC), the residue was purified by silica gel column chromatography (10% v/v EA in hexane) to afford **3a** as a white solid in 79% yield.

### c) General procedure for the synthesis of product **6a - b** (**6a** as an example) and **7a**:

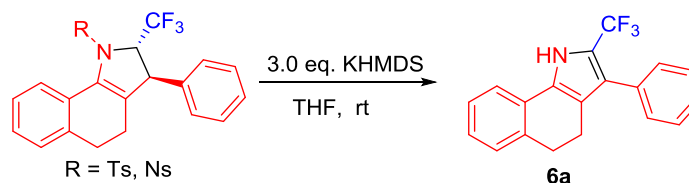

To a solution of **3a** (0.10 mmol) in dry  $\text{THF}$  (2.0 mL), 0.30 mmol  $\text{KHMDS}$  was

added dropwise at rt under nitrogen atmosphere. The mixture was stirred at rt until completed by TLC. The mixture was quenched by  $\text{NH}_4\text{Cl}$  until PH is about 7. Then the crude residue was purified by silica gel column chromatography (20% v/v EA in hexane) to afford **6a** as a pale yellow solid in 85% yield.

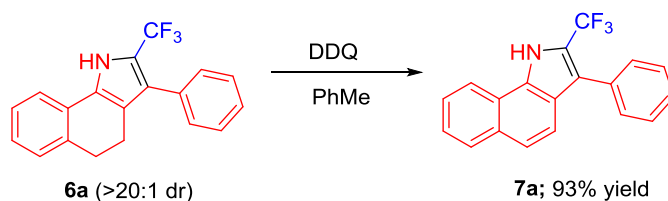

To a solution of **6a** (0.10 mmol, 31.3 mg) in dry PhMe (2.0 mL), 0.30 mmol DDQ was added. The mixture was stirred at 120 °C for 12 h. After the reaction completed, then the residue was purified by silica gel column chromatography (25% v/v EA in hexane) to afford **7a** as a pale yellow solid in 93% yield.

#### d) Stereochemistry determination via X-ray crystallographic analysis of product **3c**.

Product **3c** was crystallized as a colorless crystal via vaporization of a hexane/ethyl acetate solution, and its absolute configuration was determined by x-ray structure analysis. **3c**: CDCC: 1997969 contains the supplementary crystallographic data that can be obtained free of charge from The Cambridge Crystallographic Data Centre via <https://www.ccdc.cam.ac.uk/>.

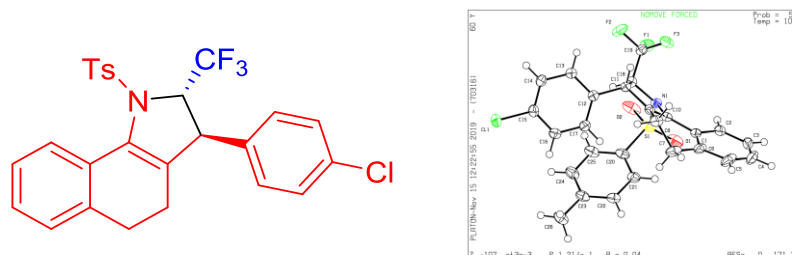

**Fig 1.** X-ray crystal structure of compound **3c**.

### 3. Characterizations of products, reference.

Structure of known compounds **1a-b** and **1e-f** were confirmed by NMR spectral comparison with literature data <sup>[1-3]</sup>. For compounds not reported before, <sup>1</sup>H NMR, <sup>13</sup>C NMR and <sup>19</sup>F NMR characterization and the corresponding spectra are provided.

#### a) Characterizations of compounds **1c-d**, **1g-o**, **4a-l** and Products **3a-o**, **5a-l**.

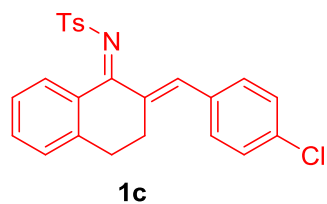

**N-((Z)-2-((E)-4-chlorobenzylidene)-3,4-dihydro-1H-naphthalen-1(2H)-ylidene)-4-methylbenzenesulfonamide (1c)**: 60% yield, yellow solid: mp 135.1-136.0 °C; <sup>1</sup>H NMR

(400 MHz, CDCl<sub>3</sub>)  $\delta$  = 8.15 (dd,  $J$  = 8.0, 1.6 Hz, 1H), 7.94 (d,  $J$  = 8.4 Hz, 2H), 7.77 (s, 1H), 7.45 (td,  $J$  = 7.6, 1.6 Hz, 1H), 7.39 - 7.32 (m, 6H), 7.29 - 7.25 (m, 1H), 7.19 (d,  $J$  = 7.6 Hz, 1H), 3.01 - 2.96 (m, 4H), 2.44 (s, 3H); <sup>13</sup>C NMR (100 MHz, CDCl<sub>3</sub>)  $\delta$  = 174.6, 143.1, 142.9, 139.7, 137.3, 136.1, 134.5, 134.0, 133.7, 133.0, 130.9, 129.5, 128.9, 128.4, 127.1, 127.0, 30.8, 27.4, 21.7; HRMS(ESI) calcd for C<sub>24</sub>H<sub>20</sub>ClNO<sub>2</sub>S (M+H)<sup>+</sup>: 422.0976, Found: 422.0979.

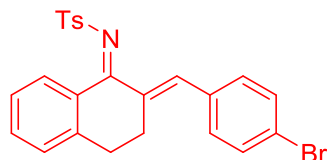

**1d**

***N*-((*Z*)-2-((*E*)-4-bromobenzylidene)-3,4-dihydronaphthalen-1(2*H*)-ylidene)-4-methylbenzenesulfonamide (1d):** 65% yield, yellow solid: mp 111.0-113.6 °C; <sup>1</sup>H NMR (400 MHz, CDCl<sub>3</sub>)  $\delta$  = 8.14 (dd,  $J$  = 8.0, 1.6 Hz, 1H), 7.95 - 7.92 (m, 2H), 7.74 (s, 1H), 7.55 - 7.52 (m, 2H), 7.45 (td,  $J$  = 8.8, 1.6 Hz, 1H), 7.33 (d,  $J$  = 8.0 Hz, 2H), 7.29 - 7.25 (m, 3H), 7.19 (d,  $J$  = 7.6 Hz, 1H), 3.00 - 2.97 (m, 2H), 2.95 - 2.92 (m, 2H), 2.44 (s, 3H); <sup>13</sup>C NMR (100 MHz, CDCl<sub>3</sub>)  $\delta$  = 174.6, 143.1, 142.9, 139.7, 136.2, 134.5, 133.7, 133.0, 131.8, 131.2, 129.5, 128.8, 128.4, 127.1, 127.0, 122.7, 30.8, 27.4, 21.7; HRMS(ESI) calcd for C<sub>24</sub>H<sub>20</sub>BrNO<sub>2</sub>S (M+H)<sup>+</sup>: 466.0471, Found: 466.0473.

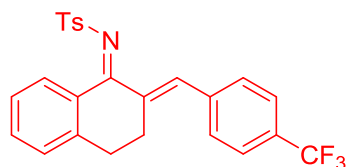

**1g**

**4-methyl-*N*-((*Z*)-2-((*E*)-4-(trifluoromethyl)benzylidene)-3,4-dihydronaphthalen-1(2*H*)-ylidene)benzenesulfonamide (1g):** 72% yield, yellow solid: mp 131.6-133.4 °C; <sup>1</sup>H NMR (400 MHz, CDCl<sub>3</sub>)  $\delta$  = 8.13 (dd,  $J$  = 8.0, 1.2 Hz, 1H), 7.94 (d,  $J$  = 8.4 Hz, 2H), 7.77 (s, 1H), 7.70 (d,  $J$  = 8.0 Hz, 2H), 7.52 - 7.45 (m, 3H), 7.34 (d,  $J$  = 8.0 Hz, 2H), 7.29 (d,  $J$  = 8.0 Hz, 1H), 7.21 (d,  $J$  = 7.6 Hz, 1H), 3.02 (t,  $J$  = 6.4 Hz, 2H), 2.93 (t,  $J$  = 6.4 Hz, 2H), 2.45 (s, 3H); <sup>13</sup>C NMR (100 MHz, CDCl<sub>3</sub>)  $\delta$  = 174.3, 143.3, 142.8, 140.3, 139.4, 138.2, 135.6, 133.9, 132.9, 132.4, 130.5, 129.6, 128.9, 128.3, 127.2, 127.1, 118.8, 111.8, 30.9, 27.5, 21.7; <sup>19</sup>F NMR (376 Hz, CDCl<sub>3</sub>)  $\delta$  = -62.48 (s, 3F); HRMS(ESI) calcd for C<sub>25</sub>H<sub>21</sub>F<sub>3</sub>NO<sub>2</sub>S (M+H)<sup>+</sup>: 456.1240, Found: 456.1238.

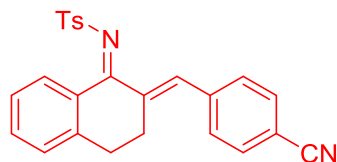

**1h**

***N*-((*Z*)-2-((*E*)-4-cyanobenzylidene)-3,4-dihydronaphthalen-1(2*H*)-ylidene)-4-methylbenzenesulfonamide (1h):** 75% yield, yellow solid: mp 174.5-175.9 °C; <sup>1</sup>H NMR (400 MHz, CDCl<sub>3</sub>)  $\delta$  = 8.13 (d,  $J$  = 8.0 Hz, 1H), 7.94 (d,  $J$  = 8.0 Hz, 2H), 7.77 (s, 1H), 7.70 (d,  $J$  = 8.0 Hz, 2H), 7.52 - 7.45 (m, 3H), 7.34 (d,  $J$  = 8.0 Hz, 2H), 7.29 (d,  $J$  = 7.6 Hz, 1H), 7.21 (d,  $J$  = 7.6 Hz, 1H), 3.02 (t,  $J$  = 6.4 Hz, 2H), 2.93 (t,  $J$  = 6.0 Hz, 2H),

2.45 (s, 3H);  $^{13}\text{C}$  NMR (100 MHz,  $\text{CDCl}_3$ )  $\delta$  = 174.3, 143.3, 142.8, 140.3, 139.4, 138.2, 135.6, 133.9, 132.9, 132.4, 130.0, 129.6, 128.9, 128.3, 127.2, 127.0, 118.8, 111.8, 30.9, 27.5, 21.7; HRMS(ESI) calcd for  $\text{C}_{25}\text{H}_{21}\text{N}_2\text{O}_2\text{S}$  ( $\text{M}+\text{H}$ ) $^+$ : 413.1318, Found: 413.1315.

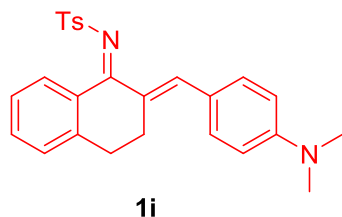

***N*-((*Z*)-2-((*E*)-4-(dimethylamino)benzylidene)-3,4-dihydronaphthalen-1(2*H*)-ylidene)-4-methylbenzenesulfonamide (1i):** 78% yield, red solid: mp 135.1-137.2 °C;  $^1\text{H}$  NMR (400 MHz,  $\text{CDCl}_3$ )  $\delta$  = 8.17 (dt,  $J$  = 8.0, 1.2 Hz, 1H), 7.94 (d,  $J$  = 8.4 Hz, 2H), 7.90 (s, 1H), 7.44 - 7.40 (m, 3H), 7.30 (d,  $J$  = 8.4 Hz, 2H), 7.27 - 7.25 (m, 1H), 7.18 (d,  $J$  = 7.6 Hz, 1H), 6.70 (d,  $J$  = 8.4 Hz, 2H), 3.05 (t,  $J$  = 6.4 Hz, 2H), 3.03 (s, 6H), 2.91 (t,  $J$  = 6.4 Hz, 2H), 2.43 (s, 3H);  $^{13}\text{C}$  NMR (100 MHz,  $\text{CDCl}_3$ )  $\delta$  = 174.3, 150.9, 142.7, 142.5, 141.8, 140.5, 133.4, 133.1, 132.4, 130.7, 129.4, 128.9, 128.2, 126.9, 126.7, 123.5, 111.7, 40.3, 30.2, 27.6, 21.6; HRMS(ESI) calcd for  $\text{C}_{26}\text{H}_{27}\text{N}_2\text{O}_2\text{S}$  ( $\text{M}+\text{H}$ ) $^+$ : 431.1788, Found: 431.1784.

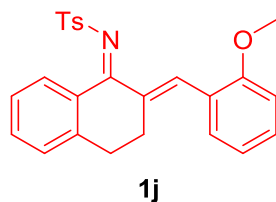

***N*-((*Z*)-2-((*E*)-2-methoxybenzylidene)-3,4-dihydronaphthalen-1(2*H*)-ylidene)-4-methylbenzenesulfonamide (1j):** 67% yield, yellow solid: mp 163.0-163.5 °C;  $^1\text{H}$  NMR (400 MHz,  $\text{CDCl}_3$ )  $\delta$  = 8.16 (dd,  $J$  = 8.0, 1.2 Hz, 1H), 7.96 - 7.94 (m, 3H), 7.43 (td,  $J$  = 8.8, 1.2 Hz, 1H), 7.36 - 7.30 (m, 4H), 7.27 - 7.23 (m, 1H), 7.16 (d,  $J$  = 7.6 Hz, 1H), 6.98 (t,  $J$  = 7.2 Hz, 1H), 6.92 (d,  $J$  = 8.4 Hz, 1H), 3.83 (s, 3H), 2.98 - 2.91 (m, 4H), 2.44 (s, 3H);  $^{13}\text{C}$  NMR (100 MHz,  $\text{CDCl}_3$ )  $\delta$  = 174.9, 158.3, 143.2, 142.7, 140.1, 136.3, 134.8, 133.5, 133.1, 130.7, 130.4, 129.4, 128.7, 128.4, 127.1, 126.8, 124.7, 120.3, 110.8, 55.6, 30.8, 28.0, 21.7; HRMS(ESI) calcd for  $\text{C}_{25}\text{H}_{24}\text{NO}_3\text{S}$  ( $\text{M}+\text{H}$ ) $^+$ : 418.1471, Found: 418.1476.

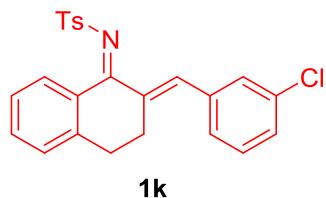

***N*-((*Z*)-2-((*E*)-3-chlorobenzylidene)-3,4-dihydronaphthalen-1(2*H*)-ylidene)-4-methylbenzenesulfonamide (1k):** 69% yield, yellow oil;  $^1\text{H}$  NMR (400 MHz,  $\text{CDCl}_3$ )  $\delta$  = 8.15 (d,  $J$  = 8.0 Hz, 1H), 7.93 (d,  $J$  = 7.2 Hz, 2H), 7.73 (s, 1H), 7.46 (t,  $J$  = 7.2 Hz, 1H), 7.47 - 7.32 (m, 5H), 7.29 - 7.26 (m, 2H), 7.20 (d,  $J$  = 7.2 Hz, 1H), 3.01 - 2.92 (m, 4H), 2.45 (s, 3H);  $^{13}\text{C}$  NMR (100 MHz,  $\text{CDCl}_3$ )  $\delta$  = 174.5, 143.1, 142.9, 139.6, 137.3, 136.7, 134.5, 133.8, 130.0, 129.9, 129.5, 129.3, 128.9, 128.5, 128.3, 127.7, 127.1,

127.0, 30.9, 27.5, 21.7; HRMS(ESI) calcd for C<sub>24</sub>H<sub>21</sub>ClNO<sub>2</sub>S (M+H)<sup>+</sup>: 422.0976, Found: 422.0977.

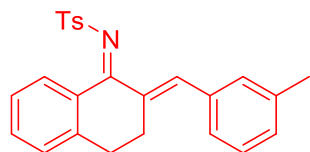

1l

**4-methyl-N-((Z)-2-((E)-3-methylbenzylidene)-3,4-dihydronaphthalen-1(2H)-ylidene)benzenesulfonamide (1l):** 70% yield, yellow oil; <sup>1</sup>H NMR (400 MHz, CDCl<sub>3</sub>) δ = 8.16 (d, *J* = 8.0 Hz, 1H), 7.94 (d, *J* = 7.6 Hz, 2H), 7.82 (s, 1H), 7.44 (t, *J* = 7.6 Hz, 1H), 7.33 - 7.25 (m, 5H), 7.22 - 7.18 (m, 3H), 7.16 (d, *J* = 7.6 Hz, 1H), 2.98 (s, 4H), 2.44 (s, 3H), 2.38 (s, 3H); <sup>13</sup>C NMR (100 MHz, CDCl<sub>3</sub>) δ = 174.9, 143.1, 142.9, 139.9, 139.2, 138.2, 135.5, 135.2, 133.6, 133.1, 130.4, 129.5, 129.4, 128.8, 128.5, 128.4, 127.0, 126.9, 126.6, 30.8, 27.5, 21.7, 21.5; HRMS(ESI) calcd for C<sub>25</sub>H<sub>24</sub>NO<sub>2</sub>S (M+H)<sup>+</sup>: 402.1522, Found: 402.1526.

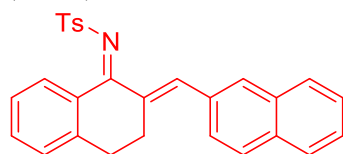

1m

**4-methyl-N-((1Z,2E)-2-(naphthalen-2-ylmethylene)-3,4-dihydronaphthalen-1(2H)-ylidene)benzenesulfonamide (1m):** 78% yield, yellow oil; <sup>1</sup>H NMR (400 MHz, CDCl<sub>3</sub>) δ = 8.19 (d, *J* = 8.0 Hz, 1H), 8.00 (s, 1H), 7.96 (d, *J* = 8.0 Hz, 2H), 7.89 - 7.84 (m, 4H), 7.53 - 7.49 (m, 3H), 7.46 (tt, *J* = 7.6, 2.0, 0.8 Hz, 1H), 7.33 (d, *J* = 8.0 Hz, 2H), 7.29 (t, *J* = 8.0 Hz, 1H), 7.20 (d, *J* = 7.6 Hz, 1H), 3.07 (t, *J* = 6.4 Hz, 2H), 2.99 (t, *J* = 6.4 Hz, 2H), 2.45 (s, 3H); <sup>13</sup>C NMR (100 MHz, CDCl<sub>3</sub>) δ = 174.8, 143.1, 139.8, 139.0, 135.7, 133.6, 133.2, 133.1 (d, *J* = 2.6 Hz), 129.5, 129.3, 128.8, 128.5, 128.2, 127.8, 127.1, 127.0, 126.8, 126.6, 30.8, 27.6, 21.7; HRMS(ESI) calcd for C<sub>28</sub>H<sub>24</sub>NO<sub>2</sub>S (M+H)<sup>+</sup>: 438.1522, Found: 438.1516.

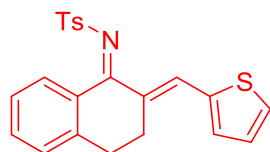

1n

**4-methyl-N-((1Z,2E)-2-(thiophen-2-ylmethylene)-3,4-dihydronaphthalen-1(2H)-ylidene)benzenesulfonamide (1n):** 76% yield, pale yellow solid: mp 161.7-163.4 °C; <sup>1</sup>H NMR (400 MHz, CDCl<sub>3</sub>) δ = 8.18 (d, *J* = 8.0 Hz, 1H), 8.02 (s, 1H), 7.93 (d, *J* = 8.4 Hz, 2H), 7.50 (d, *J* = 5.2 Hz, 1H), 7.45 (td, *J* = 8.8 Hz, 1H), 7.38 (d, *J* = 4.0 Hz, 1H), 7.32 - 7.28 (m, 3H), 7.23 (d, *J* = 7.6 Hz, 1H), 7.12 (dd, *J* = 5.2, 3.6 Hz, 1H), 3.07 - 2.99 (m, 4H), 2.43 (s, 3H); <sup>13</sup>C NMR (100 MHz, CDCl<sub>3</sub>) δ = 173.8, 143.0, 142.5, 139.8, 138.7, 133.7, 133.2, 132.4, 131.1, 129.6, 129.5, 129.2, 128.2, 127.7, 127.0, 126.8, 29.4, 27.2, 21.7; HRMS(ESI) calcd for C<sub>22</sub>H<sub>20</sub>NO<sub>2</sub>S<sub>2</sub> (M+H)<sup>+</sup>: 394.0930, Found: 394.0934.

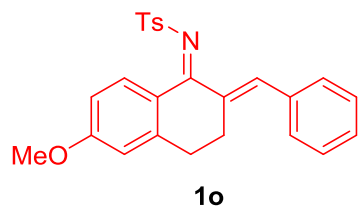

***N*-((*Z*)-2-((*E*)-benzylidene)-6-methoxy-3,4-dihydronaphthalen-1(2*H*)-ylidene)-4-methylbenzenesulfonamide (**1o**):** 75% yield, yellow solid: mp 106.5-108.3 °C; <sup>1</sup>H NMR (400 MHz, CDCl<sub>3</sub>) δ = 8.17 (d, *J* = 9.2 Hz, 1H), 7.93 (d, *J* = 8.4 Hz, 2H), 7.87 (s, 1H), 7.43 - 7.37 (m, 4H), 7.35 - 7.30 (m, 3H), 6.81 (dd, *J* = 9.2, 2.8 Hz, 1H), 6.66 (d, *J* = 2.8 Hz, 1H), 3.85 (s, 3H), 2.98 - 2.90 (m, 4H), 2.44 (s, 3H); <sup>13</sup>C NMR (100 MHz, CDCl<sub>3</sub>) δ = 173.7, 164.1, 145.8, 142.7, 140.3, 138.8, 135.7, 135.5, 131.4, 129.7, 129.4, 128.6, 128.5, 126.9, 125.9, 113.6, 112.7, 55.6, 31.3, 27.5, 21.7; HRMS(ESI) calcd for C<sub>25</sub>H<sub>24</sub>NO<sub>3</sub>S (M+H)<sup>+</sup>: 418.1471, Found: 418.1474.

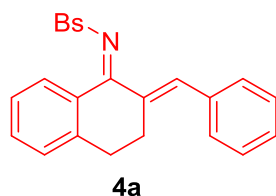

***N*-((*Z*)-2-((*E*)-benzylidene)-3,4-dihydronaphthalen-1(2*H*)-ylidene)benzenesulfonamide (**4a**):** 70% yield, yellow solid: mp 104.9-105.3 °C; <sup>1</sup>H NMR (400 MHz, CDCl<sub>3</sub>) δ = 8.17 (dd, *J* = 8.0, 1.2 Hz, 1H), 8.08 - 8.04 (m, 2H), 7.86 (s, 1H), 7.58 - 7.51 (m, 3H), 7.47 (td, *J* = 7.6, 1.2 Hz, 1H), 7.43 (d, *J* = 4.4 Hz, 4H), 7.38 - 7.33 (m, 1H), 7.30 - 7.28 (m, 1H), 7.20 (d, *J* = 7.6 Hz, 1H), 2.99 (s, 4H); <sup>13</sup>C NMR (100 MHz, CDCl<sub>3</sub>) δ = 175.2, 143.1, 142.7, 139.1, 135.6, 135.5, 133.7, 133.1, 132.3, 129.6, 128.9, 128.8, 128.6 (d, *J* = 4.0 Hz), 128.5, 128.4, 127.0, 126.9, 30.8, 27.4; HRMS(ESI) calcd for C<sub>23</sub>H<sub>20</sub>NO<sub>2</sub>S (M+H)<sup>+</sup>: 374.1209, Found: 374.1205.

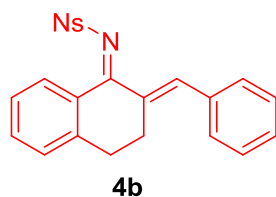

***N*-((*Z*)-2-((*E*)-benzylidene)-3,4-dihydronaphthalen-1(2*H*)-ylidene)-4-nitrobenzenesulfonamide (**4b**):** 80% yield, yellow solid: mp 161.4-162.7 °C; <sup>1</sup>H NMR (400 MHz, CDCl<sub>3</sub>) δ = 8.39 (d, *J* = 8.8 Hz, 2H), 8.25 (d, *J* = 8.8 Hz, 2H), 8.09 (d, *J* = 8.0 Hz, 1H), 7.90 (s, 1H), 7.50 (t, *J* = 7.6 Hz, 1H), 7.45 - 7.41 (m, 4H), 7.40 - 7.35 (m, 1H), 7.29 (t, *J* = 7.6 Hz, 1H), 7.23 (d, *J* = 7.6 Hz, 1H), 3.07 - 2.99 (m, 4H); <sup>13</sup>C NMR (100 MHz, CDCl<sub>3</sub>) δ = 176.7, 149.8, 148.4, 143.6, 140.2, 135.6, 135.3, 134.4, 132.6, 129.7, 129.0 (d, *J* = 4.3 Hz), 128.7, 128.5, 128.2, 127.1, 124.2, 30.7, 27.6; HRMS(ESI) calcd for C<sub>23</sub>H<sub>19</sub>N<sub>2</sub>O<sub>4</sub>S (M+H)<sup>+</sup>: 419.1060, Found: 419.1067.



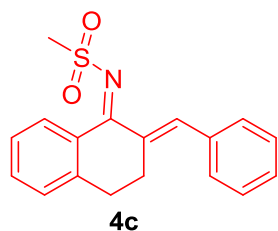

***N*-((*Z*)-2-((*E*)-benzylidene)-3,4-dihydronaphthalen-1(2*H*)-ylidene)methanesulfonamide (**4c**):** 78% yield, yellow solid: mp 137.7-138.6 °C; <sup>1</sup>H NMR (400 MHz, CDCl<sub>3</sub>) δ = 8.25 (dd, *J* = 8.0, 1.2 Hz, 1H), 7.78 (s, 1H), 7.48 (td, *J* = 7.6, 1.6 Hz, 1H), 7.43 - 7.38 (m, 4H), 7.36 - 7.31 (m, 2H), 7.22 (d, *J* = 7.6 Hz, 1H), 3.28 (s, 3H), 2.99 (s, 4H); <sup>13</sup>C NMR (100 MHz, CDCl<sub>3</sub>) δ = 175.6, 143.1, 138.5, 135.6, 135.4, 133.6, 132.9, 129.6, 128.8, 128.6, 128.2, 126.9, 43.9, 30.8, 27.3; HRMS(ESI) calcd for C<sub>18</sub>H<sub>18</sub>NO<sub>2</sub>S (M+H)<sup>+</sup>: 312.1053, Found: 312.1052.

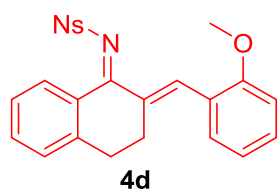

***N*-((*Z*)-2-((*E*)-2-methoxybenzylidene)-3,4-dihydronaphthalen-1(2*H*)-ylidene)-4-nitrobenzenesulfonamide (**4d**):** 73% yield, yellow oil; <sup>1</sup>H NMR (400 MHz, CDCl<sub>3</sub>) δ = 8.38 (d, *J* = 8.8 Hz, 2H), 8.25 (d, *J* = 8.8 Hz, 2H), 8.09 (d, *J* = 8.0 Hz, 1H), 8.03 (s, 1H), 7.48 (t, *J* = 7.6 Hz, 1H), 7.40 - 7.26 (m, 2H), 7.28 (d, *J* = 7.6 Hz, 1H), 7.20 (d, *J* = 7.6 Hz, 1H), 7.01 (t, *J* = 7.2 Hz, 1H), 6.95 (d, *J* = 8.4 Hz, 1H), 3.85 (s, 3H), 3.03 - 2.95 (m, 4H); <sup>13</sup>C NMR (100 MHz, CDCl<sub>3</sub>) δ = 176.7, 158.4, 149.7, 148.7, 143.7, 137.6, 135.0, 134.3, 132.5, 130.9, 130.7, 128.9, 128.5, 128.2, 127.1, 124.4, 124.2, 120.4, 110.9, 55.7, 30.7, 28.2; HRMS(ESI) calcd for C<sub>24</sub>H<sub>21</sub>N<sub>2</sub>O<sub>5</sub>S (M+H)<sup>+</sup>: 449.1166, Found: 449.1169.

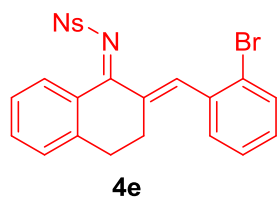

***N*-((*Z*)-2-((*E*)-2-bromobenzylidene)-3,4-dihydronaphthalen-1(2*H*)-ylidene)-4-nitrobenzenesulfonamide (**4e**):** 69% yield, yellow solid: mp 201.1-202.6 °C; <sup>1</sup>H NMR (400 MHz, CDCl<sub>3</sub>) δ = 8.40 (d, *J* = 8.4 Hz, 2H), 8.27 (d, *J* = 8.8 Hz, 2H), 8.10 (d, *J* = 8.4 Hz, 1H), 7.86 (s, 1H), 7.65 (d, *J* = 8.0 Hz, 1H), 7.50 (t, *J* = 7.6 Hz, 1H), 7.44 - 7.36 (m, 2H), 7.31 - 7.21 (m, 3H), 2.99 (t, *J* = 6.4 Hz, 2H), 2.89 (t, *J* = 6.0 Hz, 2H); <sup>13</sup>C NMR (100 MHz, CDCl<sub>3</sub>) δ = 176.3, 149.9, 148.4, 143.8, 138.9, 137.0, 136.0, 134.5, 133.0, 132.4, 131.0, 130.2, 129.1, 128.5, 128.2, 127.4, 127.2, 124.5, 124.2, 30.9, 28.2; HRMS(ESI) calcd for C<sub>23</sub>H<sub>18</sub>BrN<sub>2</sub>O<sub>4</sub>S (M+H)<sup>+</sup>: 497.0165, Found: 497.0160.

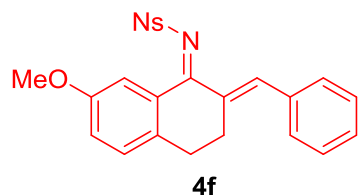

***N*-((*Z*)-2-((*E*)-benzylidene)-7-methoxy-3,4-dihydronaphthalen-1(2*H*)-ylidene)-4-nitrobenzenesulfonamide (4f):** 72% yield, yellow solid: mp 155.2-155.6 °C; <sup>1</sup>H NMR (400 MHz, CDCl<sub>3</sub>) δ = 8.39 - 8.36 (m, 2H), 8.26 - 8.23 (m, 2H), 7.86 (s, 1H), 7.58 (d, *J* = 2.8 Hz, 1H), 7.44 - 7.40 (m, 4H), 7.39 - 7.34 (m, 1H), 7.14 (d, *J* = 8.4 Hz, 1H), 7.07 (dd, *J* = 8.4, 2.8 Hz, 1H), 3.78 (s, 3H), 3.02 (t, *J* = 6.4 Hz, 2H), 2.94 (t, *J* = 6.4 Hz, 2H); <sup>13</sup>C NMR (100 MHz, CDCl<sub>3</sub>) δ = 176.7, 158.4, 149.8, 148.4, 140.1, 136.3, 135.7, 135.3, 133.4, 130.1, 129.7, 129.0, 128.7, 128.2, 124.2, 121.9, 11.2, 55.6, 29.9, 27.9; HRMS(ESI) calcd for C<sub>24</sub>H<sub>21</sub>N<sub>2</sub>O<sub>5</sub>S (M+H)<sup>+</sup>: 449.1166, Found: 449.1163.

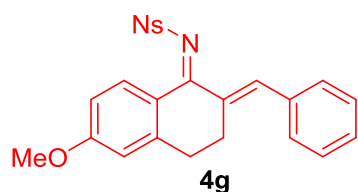

***N*-((*Z*)-2-((*E*)-benzylidene)-6-methoxy-3,4-dihydronaphthalen-1(2*H*)-ylidene)-4-nitrobenzenesulfonamide (4g):** 75% yield, yellow solid: mp 119.2-120.0 °C; <sup>1</sup>H NMR (400 MHz, CDCl<sub>3</sub>) δ = 8.37 (d, *J* = 9.2 Hz, 2H), 8.24 (d, *J* = 8.8 Hz, 2H), 8.10 (d, *J* = 8.8 Hz, 1H), 7.91 (s, 1H), 7.43 - 7.34 (m, 5H), 6.82 (dd, *J* = 9.6, 2.8 Hz, 1H), 6.68 (d, *J* = 3.6 Hz, 1H), 3.86 (s, 3H), 3.02 (d, *J* = 6.4 Hz, 2H), 2.95 (d, *J* = 6.4 Hz, 2H); <sup>13</sup>C NMR (100 MHz, CDCl<sub>3</sub>) δ = 175.3, 164.8, 149.6, 148.9, 146.5, 140.0, 135.6, 135.4, 131.5, 129.8, 128.9, 128.7, 128.0, 125.4, 124.2, 113.9, 112.9, 55.7, 31.2, 27.7; HRMS(ESI) calcd for C<sub>24</sub>H<sub>21</sub>N<sub>2</sub>O<sub>5</sub>S (M+H)<sup>+</sup>: 449.1166, Found: 449.1172.

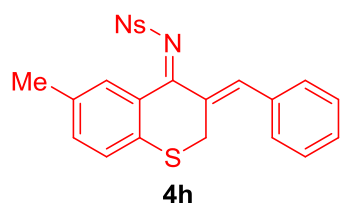

***N*-((*Z*)-3-((*E*)-benzylidene)-6-methylthiochroman-4-ylidene)-4-nitrobenzenesulfonamide (4h):** 72% yield, yellow solid: mp 144.8-145.5 °C; <sup>1</sup>H NMR (400 MHz, CDCl<sub>3</sub>) δ = 8.40 (d, *J* = 8.8 Hz, 2H), 8.25 (d, *J* = 8.4 Hz, 2H), 7.90 (s, 1H), 7.72 (s, 1H), 7.50 - 7.44 (m, 4H), 7.39 (t, *J* = 7.6 Hz, 1H), 7.22 (d, *J* = 8.4 Hz, 1H), 7.15 (d, *J* = 8.0 Hz, 1H), 3.99 (s, 2H), 2.29 (s, 3H); <sup>13</sup>C NMR (100 MHz, CDCl<sub>3</sub>) δ = 174.9, 150.0, 147.9, 140.1, 139.0, 135.5, 135.2, 134.7, 130.6, 130.1, 129.6, 129.5, 129.0, 128.4, 127.7, 124.3, 27.6, 21.0; HRMS(ESI) calcd for C<sub>23</sub>H<sub>19</sub>N<sub>2</sub>O<sub>4</sub>S<sub>2</sub> (M+H)<sup>+</sup>: 451.0781, Found: 451.0782.

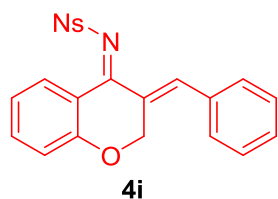

**N-((Z)-3-((E)-benzylidene)chroman-4-ylidene)-4-nitrobenzenesulfonamide (4i):** 75% yield, yellow solid: mp 185.7-186.1 °C; <sup>1</sup>H NMR (400 MHz, CDCl<sub>3</sub>) δ = 9.07 - 9.04 (m, 1H), 8.26 (d, *J* = 8.4 Hz, 2H), 8.07 (d, *J* = 8.4 Hz, 2H), 7.77 - 7.70 (m, 3H), 7.60 (s, 1H), 7.24 - 7.20 (m, 3H), 7.03 (d, *J* = 7.2 Hz, 2H), 3.97 (s, 2H); <sup>13</sup>C NMR (100 MHz, CDCl<sub>3</sub>) δ = 163.5, 149.9, 149.3, 138.1, 137.9, 136.8, 133.0, 132.1, 129.1, 128.9, 128.2, 128.0, 127.4, 126.9, 126.7, 124.1, 40.0; HRMS(ESI) calcd for C<sub>22</sub>H<sub>16</sub>N<sub>2</sub>O<sub>5</sub>S (M+H)<sup>+</sup>: 421.0853, Found: 421.0850.

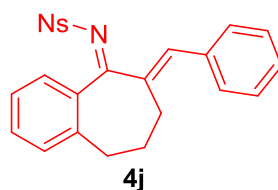

**N-((Z)-6-((E)-benzylidene)-6,7,8,9-tetrahydro-5H-benzo[7]annulen-5-ylidene)-4-nitrobenzenesulfonamide (4j):** 77% yield, pale yellow solid : mp 140.5-142.6 °C; <sup>1</sup>H NMR (400 MHz, CDCl<sub>3</sub>) δ = 8.33 (d, *J* = 8.8 Hz, 2H), 8.15 (d, *J* = 8.8 Hz, 2H), 7.85 (d, *J* = 7.6 Hz, 2H), 7.49 (td, *J* = 8.0, 1.2 Hz, 1H), 7.43 - 7.34 (m, 6H), 7.20 (d, *J* = 7.6 Hz, 1H), 2.79 (t, *J* = 6.8 Hz, 2H), 2.53 (s, 2H), 1.98 - 1.91 (m, 2H); <sup>13</sup>C NMR (100 MHz, CDCl<sub>3</sub>) δ = 183.4, 149.9, 147.6, 141.7, 139.0, 138.9 (q, *J* = 4.2 Hz), 137.4, 135.9, 135.5, 132.9, 129.9, 129.7, 129.2, 129.1, 128.7, 128.4, 126.7, 124.1, 31.8 (d, *J* = 3.1 Hz), 27.1, 25.6; HRMS(ESI) calcd for C<sub>24</sub>H<sub>21</sub>N<sub>2</sub>O<sub>4</sub>S (M+H)<sup>+</sup>: 433.1217, Found: 433.1213.

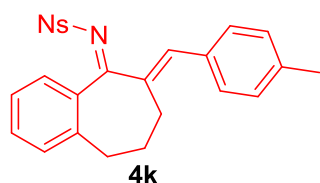

**N-((Z)-6-((E)-4-methylbenzylidene)-6,7,8,9-tetrahydro-5H-benzo[7]annulen-5-ylidene)-4-nitrobenzenesulfonamide (4k):** 76% yield, yellow solid: mp 158.8-159.9 °C; <sup>1</sup>H NMR (400 MHz, CDCl<sub>3</sub>) δ = 8.34 - 8.30 (m, 2H), 8.15 - 8.12 (m, 2H), 7.88 (s, 1H), 7.83 (d, *J* = 7.6 Hz, 1H), 7.48 (tt, *J* = 7.6, 1.6 Hz, 1H), 7.39 - 7.32 (m, 3H), 7.20 (t, *J* = 8.4 Hz, 3H), 2.76 (t, *J* = 6.8 Hz, 2H), 2.51 (s, 2H), 2.38 (s, 3H), 1.97 - 1.91 (m, 2H); <sup>13</sup>C NMR (100 MHz, CDCl<sub>3</sub>) δ = 183.4, 149.8, 147.7, 139.7, 139.4, 136.4, 136.0, 132.8, 132.6, 129.9, 129.5, 128.4, 126.7, 124.1, 31.8, 27.1, 25.5, 21.5; HRMS(ESI) calcd for C<sub>25</sub>H<sub>23</sub>N<sub>2</sub>O<sub>4</sub>S (M+H)<sup>+</sup>: 447.1373, Found: 447.1370.

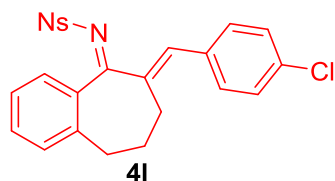

**N-((Z)-6-((E)-4-chlorobenzylidene)-6,7,8,9-tetrahydro-5H-benzo[7]annulen-5-ylidene)-4-nitrobenzenesulfonamide (4l):** 70% yield, yellow oil;  $^1\text{H}$  NMR (400 MHz,  $\text{CDCl}_3$ )  $\delta$  = 8.34 (d,  $J$  = 8.8 Hz, 2H), 8.15 (d,  $J$  = 8.8 Hz, 2H), 7.84 (dd,  $J$  = 7.6, 1.2 Hz, 1H), 7.73 (s, 1H), 7.49 (td,  $J$  = 7.6, 1.2 Hz, 1H), 7.39 - 7.33 (m, 5H), 7.20 (d,  $J$  = 7.6 Hz, 1H), 2.78 (t,  $J$  = 6.4 Hz, 2H), 2.52 (s, 2H), 1.96 - 1.89 (m, 2H);  $^{13}\text{C}$  NMR (100 MHz,  $\text{CDCl}_3$ )  $\delta$  = 174.5, 143.2, 143.0, 139.9, 137.9, 136.8, 136.4, 133.8, 132.9, 132.8, 131.1, 129.9, 129.5, 128.9, 128.3, 127.3, 127.0, 126.9, 124.5, 31.0, 28.1, 21.7; HRMS(ESI) calcd for  $\text{C}_{24}\text{H}_{20}\text{ClN}_2\text{O}_4\text{S}$  ( $\text{M}+\text{H}$ ) $^+$ : 467.0827, Found: 467.0825.

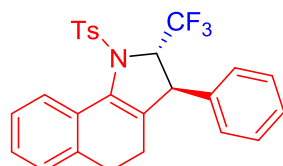

**3a**

**3-phenyl-1-tosyl-2-(trifluoromethyl)-2,3,4,5-tetrahydro-1H-benzo[g]indole (3a):** white solid: mp 205.7-206.2  $^\circ\text{C}$ ;  $^1\text{H}$  NMR (400 MHz,  $\text{CDCl}_3$ )  $\delta$  = 7.88 (dd,  $J$  = 7.2, 1.6 Hz, 1H), 7.34 - 7.23 (m, 6H), 7.17 (tt,  $J$  = 6.8, 1.2 Hz, 1H), 7.12 - 7.04 (m, 4H), 6.49 - 6.46 (m, 2H), 4.50 (qd,  $J$  = 6.4, 3.2 Hz, 1H), 3.85 (t,  $J$  = 2.8 Hz, 1H), 2.91 - 2.76 (m, 2H), 2.46 (s, 3H), 2.24 - 2.02 (m, 2H);  $^{13}\text{C}$  NMR (100 MHz,  $\text{CDCl}_3$ )  $\delta$  = 144.6, 139.6, 139.1, 135.7, 132.3, 130.6, 129.9, 128.9, 128.8, 128.7, 128.6, 128.1, 127.4, 127.3, 127.1, 126.5, 125.7, 124.7 (d,  $J$  = 279.0 Hz), 70.1 (q,  $J$  = 31.0 Hz), 49.3, 29.2, 22.9, 21.8;  $^{19}\text{F}$  NMR (376 Hz,  $\text{CDCl}_3$ )  $\delta$  = -78.17 (s, 3F); HRMS(ESI) calcd for  $\text{C}_{26}\text{H}_{23}\text{F}_3\text{NO}_2\text{S}$  ( $\text{M}+\text{H}$ ) $^+$ : 470.1396, Found: 470.1403.

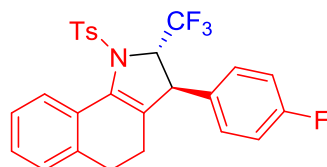

**3b**

**3-(4-fluorophenyl)-1-tosyl-2-(trifluoromethyl)-2,3,4,5-tetrahydro-1H-benzo[g]indole (3b):** white solid: mp 205.8-206.4  $^\circ\text{C}$ ;  $^1\text{H}$  NMR (400 MHz,  $\text{CDCl}_3$ )  $\delta$  = 7.85 (dd,  $J$  = 6.8, 1.6 Hz, 1H), 7.34 - 7.25 (m, 4H), 7.26 - 7.23 (m, 1H), 7.15 (d,  $J$  = 8.0 Hz, 2H), 6.79 - 6.73 (m, 2H), 6.48 - 6.43 (m, 2H), 4.46 (qd,  $J$  = 7.2, 3.2 Hz, 1H), 3.83 (t,  $J$  = 2.4 Hz, 1H), 2.90 - 2.77 (m, 2H), 2.47 (s, 3H), 2.47 - 1.99 (m, 2H);  $^{13}\text{C}$  NMR (100 MHz,  $\text{CDCl}_3$ )  $\delta$  = 144.8, 139.7, 135.6, 134.9 (d,  $J$  = 2.9 Hz), 132.3, 130.3, 129.9, 129.0, 128.9, 128.7, 128.5, 128.3, 127.4, 126.5, 126.0, 125.8, 124.6, 115.9, 115.6, 124.7 (d,  $J$  = 278.0 Hz), 70.0 (q,  $J$  = 30.0 Hz), 48.6, 29.2, 22.9, 21.7;  $^{19}\text{F}$  NMR (376 Hz,  $\text{CDCl}_3$ )  $\delta$  = -114.62 (s, 3F), -78.20 (s, 1F); HRMS(ESI) calcd for  $\text{C}_{26}\text{H}_{22}\text{F}_4\text{NO}_2\text{S}$  ( $\text{M}+\text{H}$ ) $^+$ : 488.1302, Found: 488.1303.

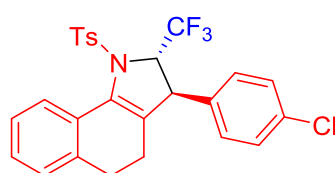

**3c**

**3-(4-chlorophenyl)-1-tosyl-2-(trifluoromethyl)-2,3,4,5-tetrahydro-1H-benzo[g]indole (3c):** white solid: mp 208.8-211.2 °C; <sup>1</sup>H NMR (400 MHz, CDCl<sub>3</sub>) δ = 7.85 (dd, *J* = 7.2, 2.0 Hz, 1H), 7.33 - 7.26 (m, 4H), 7.26 - 7.23 (m, 1H), 7.13 (d, *J* = 8.4 Hz, 2H), 7.06 - 7.03 (m, 2H), 6.46 - 6.43 (m, 2H), 4.46 (qd, *J* = 7.2, 2.8 Hz, 1H), 3.81 (t, *J* = 2.8 Hz, 1H), 2.91 - 2.78 (m, 2H), 2.48 (s, 3H), 2.26 - 2.01 (m, 2H); <sup>13</sup>C NMR (100 MHz, CDCl<sub>3</sub>) δ = 144.9, 140.0, 137.6, 135.6, 133.1, 132.3, 129.9, 129.8, 129.0, 128.7, 128.6, 128.5, 128.3, 127.4, 126.5, 125.8, 124.6 (d, *J* = 278.0 Hz), 70.0 (q, *J* = 31.0 Hz), 48.6, 29.1, 22.9, 21.7; <sup>19</sup>F NMR (376 Hz, CDCl<sub>3</sub>) δ = -78.21 (s, 3F); HRMS(ESI) calcd for C<sub>26</sub>H<sub>22</sub>F<sub>3</sub>ClNO<sub>2</sub>S (M+H)<sup>+</sup>: 504.1006, Found: 504.1015.

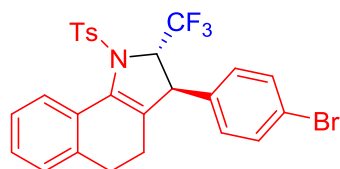

**3d**

**3-(4-bromophenyl)-1-tosyl-2-(trifluoromethyl)-2,3,4,5-tetrahydro-1H-benzo[g]indole (3d):** white oil; <sup>1</sup>H NMR (400 MHz, CDCl<sub>3</sub>) δ = 7.84 (dd, *J* = 6.8, 1.6 Hz, 1H), 7.33 - 7.26 (m, 4H), 7.26 - 7.23 (m, 1H), 7.20 (d, *J* = 8.4 Hz, 2H), 7.13 (d, *J* = 8.0 Hz, 2H), 6.40 (d, *J* = 8.4 Hz, 2H), 4.46 (qd, *J* = 7.2, 2.8 Hz, 1H), 3.79 (t, *J* = 2.4 Hz, 1H), 2.91 - 2.78 (m, 2H), 2.48 (s, 3H), 2.27 - 2.01 (m, 2H); <sup>13</sup>C NMR (100 MHz, CDCl<sub>3</sub>) δ = 144.9, 140.0, 138.2, 135.6, 132.3, 132.0, 129.8, 128.9, 128.7, 128.4, 128.3, 127.3, 126.5, 125.8, 124.5 (d, *J* = 279.0 Hz), 34.1 (q, *J* = 31.0 Hz), 48.6, 29.1, 23.0, 21.8; <sup>19</sup>F NMR (376 Hz, CDCl<sub>3</sub>) δ = -78.24 (s, 3F); HRMS(ESI) calcd for C<sub>26</sub>H<sub>22</sub>BrF<sub>3</sub>NO<sub>2</sub>S (M+H)<sup>+</sup>: 548.0501, Found: 548.0505.

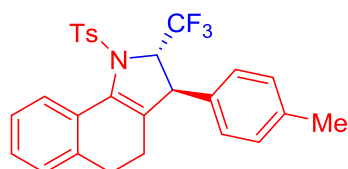

**3e**

**3-(p-tolyl)-1-tosyl-2-(trifluoromethyl)-2,3,4,5-tetrahydro-1H-benzo[g]indole (3e):** white solid: mp 190.5-193.3 °C; <sup>1</sup>H NMR (400 MHz, CDCl<sub>3</sub>) δ = 7.85 (dd, *J* = 7.2, 1.6 Hz, 1H), 7.33 - 7.28 (m, 3H), 7.27 - 7.22 (m, 2H), 7.12 (d, *J* = 8.0 Hz, 2H), 6.87 (d, *J* = 8.0 Hz, 2H), 6.37 (d, *J* = 8.0 Hz, 2H), 4.48 (qd, *J* = 6.8, 2.8 Hz, 1H), 3.81 (t, *J* = 2.4 Hz, 1H), 2.89 - 2.75 (m, 2H), 2.47 (s, 3H), 2.31 (s, 3H), 2.23 - 2.01 (m, 2H); <sup>13</sup>C NMR (100 MHz, CDCl<sub>3</sub>) δ = 144.6, 139.4, 136.8, 136.2, 135.7, 132.4, 130.9, 129.8, 129.5, 128.7, 128.2, 127.3, 127.2, 126.5, 125.7, 124.7 (d, *J* = 279.0 Hz), 70.2 (q, *J* = 31.0 Hz), 49.1, 29.2, 22.9, 21.8, 21.2; <sup>19</sup>F NMR (376 Hz, CDCl<sub>3</sub>) δ = -78.16 (s, 3F); HRMS(ESI) calcd for C<sub>27</sub>H<sub>25</sub>F<sub>3</sub>NO<sub>2</sub>S (M+H)<sup>+</sup>: 484.1553, Found: 484.1558.

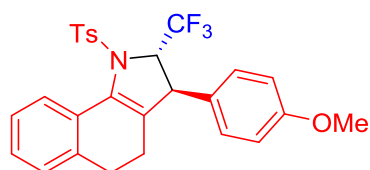

**3f**

**3-(4-methoxyphenyl)-1-tosyl-2-(trifluoromethyl)-2,3,4,5-tetrahydro-1H-benzo[g]indole (3f):** white solid: mp 184.1-186.6 °C; <sup>1</sup>H NMR (400 MHz, CDCl<sub>3</sub>) δ = 7.85 (d, *J* = 7.6 Hz, 1H), 7.36 - 7.26 (m, 4H), 7.26 - 7.22 (m, 1H), 7.15 (d, *J* = 8.0 Hz, 2H), 6.60 (d, *J* = 8.8 Hz, 2H), 6.38 (d, *J* = 8.8 Hz, 2H), 4.45 (qd, *J* = 7.6, 3.6 Hz, 1H), 3.83 - 3.79 (m, 4H), 2.88 - 2.76 (m, 2H), 2.47 (s, 3H), 2.22 - 2.00 (m, 2H); <sup>13</sup>C NMR (100 MHz, CDCl<sub>3</sub>) δ = 158.7, 144.5, 139.3, 135.6, 132.4, 131.2, 131.0, 129.9, 128.8, 128.7, 128.5, 127.3, 126.4, 125.7, 124.7 (d, *J* = 278.0 Hz), 114.2, 70.1 (q, *J* = 31.0 Hz), 55.3, 48.7, 29.2, 22.9, 21.8 ; <sup>19</sup>F NMR (376 Hz, CDCl<sub>3</sub>) δ = -78.15 (s, 3F); HRMS(ESI) calcd for C<sub>27</sub>H<sub>25</sub>F<sub>3</sub>NO<sub>3</sub>S (M+H)<sup>+</sup>: 500.1502, Found: 500.1507.

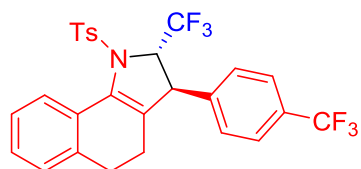

**3g**

**1-tosyl-2-(trifluoromethyl)-3-(4-(trifluoromethyl)phenyl)-2,3,4,5-tetrahydro-1H-benzo[g]indole (3g):** white oil; <sup>1</sup>H NMR (400 MHz, CDCl<sub>3</sub>) δ = 7.87 (d, *J* = 6.8 Hz, 1H), 7.34 - 7.25 (m, 7H), 7.08 (d, *J* = 8.0 Hz, 2H), 6.66 (d, *J* = 8.4 Hz, 2H), 4.48 (qd, *J* = 6.8, 2.4 Hz, 1H), 3.90 (s, 1H), 2.96 - 2.82 (m, 2H), 2.45 (s, 3H), 2.30 - 2.04 (m, 2H); <sup>13</sup>C NMR (100 MHz, CDCl<sub>3</sub>) δ = 145.0, 143.1, 140.4, 135.6, 132.2, 129.9, 129.4, 129.3 (d, *J* = 35.2 Hz), 128.7, 128.5, 128.3, 127.6, 127.4, 126.6, 125.9, 125.8 (q, *J* = 3.6 Hz), 124.0 (d, *J* = 271.0 Hz), 123.1, 69.9 (q, *J* = 31.0 Hz), 48.8, 29.1, 23.0, 21.6; <sup>19</sup>F NMR (376 Hz, CDCl<sub>3</sub>) δ = -78.26 (s, 3F), -62.52 (s, 3F); HRMS(ESI) calcd for C<sub>27</sub>H<sub>22</sub>F<sub>6</sub>NO<sub>2</sub>S (M+H)<sup>+</sup>: 538.1270, Found: 538.1275.

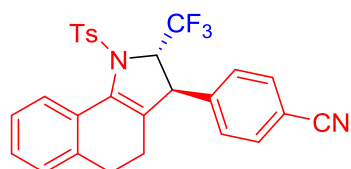

**3h**

**1-tosyl-2-(trifluoromethyl)-2,3,4,5-tetrahydro-1H-benzo[g]indol-3-yl)benzotrile (3h):** white solid: mp 209.0-210.6 °C; <sup>1</sup>H NMR (400 MHz, CDCl<sub>3</sub>) δ = 7.88 (d, *J* = 7.2 Hz, 1H), 7.34 - 7.23 (m, 6H), 7.14 (d, *J* = 7.6 Hz, 2H), 6.98 (t, *J* = 7.6 Hz, 1H), 6.71 (s, 1H), 6.48 (d, *J* = 7.6 Hz, 1H), 4.55 (qd, *J* = 7.2, 3.2 Hz, 1H), 3.82 (s, 1H), 2.88 - 2.80 (m, 2H), 2.46 (s, 3H), 2.24 - 2.02 (m, 2H); <sup>13</sup>C NMR (100 MHz, CDCl<sub>3</sub>) δ = 145.0, 141.4, 140.2, 135.7, 132.2, 130.5 (d, *J* = 4.1 Hz), 130.4, 129.9, 129.4, 128.6, 128.5, 128.4, 127.4, 126.5, 126.1, 125.8, 124.6 (d, *J* = 279.0 Hz), 123.1, 69.9 (q, *J* = 31.0 Hz), 48.8, 29.1, 22.9, 22.1; <sup>19</sup>F NMR (376 Hz, CDCl<sub>3</sub>) δ = -78.17 (s, 3F); HRMS(ESI) calcd for C<sub>27</sub>H<sub>22</sub>F<sub>3</sub>N<sub>2</sub>O<sub>2</sub>S (M+H)<sup>+</sup>: 494.1276, Found: 494.1277.

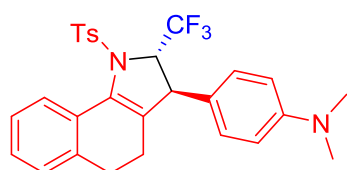

**3i**

**N,N-dimethyl-1-tosyl-2-(trifluoromethyl)-2,3,4,5-tetrahydro-1H-benzo[g]indol-3-yl)aniline (3i):** white oil;  $^1\text{H}$  NMR (400 MHz,  $\text{CDCl}_3$ )  $\delta$  = 7.86 (d,  $J$  = 7.6 Hz, 1H), 7.34 (d,  $J$  = 8.0 Hz, 2H), 7.31 - 7.21 (m, 3H), 7.16 (d,  $J$  = 7.6 Hz, 2H), 6.41 (d,  $J$  = 8.0 Hz, 2H), 6.30 (d,  $J$  = 8.0 Hz, 2H), 4.45 (qd,  $J$  = 7.2, 2.8 Hz, 1H), 3.78 (t,  $J$  = 2.8 Hz, 1H), 2.93 (s, 6H), 2.87 - 2.74 (m, 2H), 2.48 (s, 3H), 2.21 - 2.01 (m, 2H);  $^{13}\text{C}$  NMR (100 MHz,  $\text{CDCl}_3$ )  $\delta$  = 144.3, 138.9, 135.7, 132.5, 131.6, 129.9, 128.8, 128.1, 127.9, 127.3, 126.4, 125.6, 124.8 (d,  $J$  = 279.0 Hz), 112.8, 70.3 (q,  $J$  = 30.0 Hz), 48.8, 40.7, 29.2, 22.9, 21.8;  $^{19}\text{F}$  NMR (376 Hz,  $\text{CDCl}_3$ )  $\delta$  = -78.09 (s, 3F); HRMS(ESI) calcd for  $\text{C}_{28}\text{H}_{28}\text{F}_3\text{N}_2\text{O}_2\text{S}$  ( $\text{M}+\text{H}$ ) $^+$ : 513.1818, Found: 513.1818.

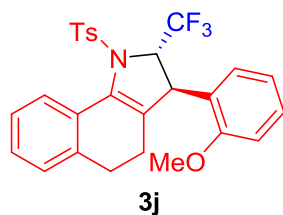

**3-(2-methoxyphenyl)-1-tosyl-2-(trifluoromethyl)-2,3,4,5-tetrahydro-1H-benzo[g]indole (3j):** white solid: mp 174.4-175.6  $^{\circ}\text{C}$ ;  $^1\text{H}$  NMR (400 MHz,  $\text{CDCl}_3$ )  $\delta$  = 7.84 (d,  $J$  = 7.2 Hz, 1H), 7.30 - 7.22 (m, 5H), 7.14 (td,  $J$  = 8.0, 2.0 Hz, 1H), 7.01 (d,  $J$  = 8.0 Hz, 2H), 6.80 (d,  $J$  = 8.4 Hz, 1H), 5.93 (d,  $J$  = 7.6 Hz, 1H), 4.61 (qd,  $J$  = 6.8, 2.0 Hz, 1H), 4.05 (t,  $J$  = 2.4 Hz, 1H), 3.83 (s, 3H), 2.95 - 2.77 (m, 2H), 2.40 (s, 3H), 2.27 - 2.05 (m, 2H);  $^{13}\text{C}$  NMR (100 MHz,  $\text{CDCl}_3$ )  $\delta$  = 156.8, 144.3, 139.4, 135.6, 133.2, 131.1, 129.7, 128.7, 128.3, 128.1, 127.9, 127.6, 127.3, 126.9, 126.5, 125.5, 124.8 (d,  $J$  = 276.0 Hz), 120.4, 110.0, 69.6 (q,  $J$  = 31.0 Hz), 55.2, 43.2, 29.1, 23.1, 21.7;  $^{19}\text{F}$  NMR (376 Hz,  $\text{CDCl}_3$ )  $\delta$  = -77.62 (s, 3F); HRMS(ESI) calcd for  $\text{C}_{27}\text{H}_{25}\text{F}_3\text{NO}_3\text{S}$  ( $\text{M}+\text{H}$ ) $^+$ : 500.1502, Found: 500.1504.

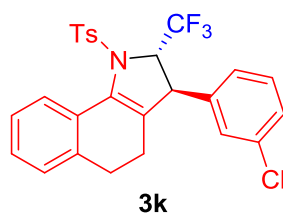

**3-(3-chlorophenyl)-1-tosyl-2-(trifluoromethyl)-2,3,4,5-tetrahydro-1H-benzo[g]indole (3k):** white oil;  $^1\text{H}$  NMR (400 MHz,  $\text{CDCl}_3$ )  $\delta$  = 7.89 (d,  $J$  = 7.2 Hz, 1H), 7.35 - 7.24 (m, 5H), 7.18 - 7.12 (m, 3H), 7.06 (t,  $J$  = 7.6 Hz, 1H), 6.52 (d,  $J$  = 7.6 Hz, 1H), 6.41 (t,  $J$  = 2.0 Hz, 1H), 4.53 (qd,  $J$  = 7.2, 3.2 Hz, 1H), 3.83 (t,  $J$  = 2.8 Hz, 1H), 2.89 - 2.81 (m, 2H), 2.45 (s, 3H), 2.25 - 2.02 (m, 2H);  $^{13}\text{C}$  NMR (100 MHz,  $\text{CDCl}_3$ )  $\delta$  = 145.1, 141.1, 140.2, 135.7, 134.8, 132.1, 130.2, 129.9, 129.4, 128.6, 128.5, 128.4, 127.6, 127.4, 127.3, 126.6, 125.8, 124.6 (d,  $J$  = 279.0 Hz), 69.9 (q,  $J$  = 30.0 Hz), 48.8, 29.1, 22.9, 22.0;  $^{19}\text{F}$  NMR (376 Hz,  $\text{CDCl}_3$ )  $\delta$  = -78.19 (s, 3F); HRMS(ESI) calcd for  $\text{C}_{26}\text{H}_{22}\text{F}_3\text{ClNO}_2\text{S}$  ( $\text{M}+\text{H}$ ) $^+$ : 504.1006, Found: 504.1014.

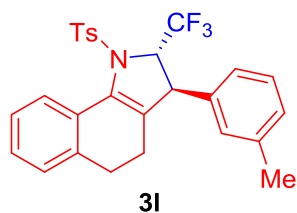

**3-(m-tolyl)-1-tosyl-2-(trifluoromethyl)-2,3,4,5-tetrahydro-1H-benzo[g]indole (3l):** white solid: mp 185.3-186.0 °C; <sup>1</sup>H NMR (400 MHz, CDCl<sub>3</sub>) δ = 7.87 (d, *J* = 7.6 Hz, 1H), 7.33 - 7.28 (m, 3H), 7.33 - 7.22 (m, 2H), 7.12 (d, *J* = 8.0 Hz, 2H), 6.99 (d, *J* = 7.6 Hz, 1H), 6.90 (t, *J* = 7.6 Hz, 1H), 6.54 (s, 1H), 6.09 (d, *J* = 7.2 Hz, 1H), 4.53 (qd, *J* = 7.2, 3.2 Hz, 1H), 3.82 (t, *J* = 2.8 Hz, 1H), 2.88 - 2.75 (m, 2H), 2.45 (s, 3H), 2.24 (s, 3H), 2.22 - 2.02 (m, 2H); <sup>13</sup>C NMR (100 MHz, CDCl<sub>3</sub>) δ = 144.5, 139.4, 139.0, 138.5, 135.7, 132.5, 130.7, 129.8, 128.8, 128.7, 128.4, 128.1, 128.0, 127.3, 126.5, 125.6, 124.7 (d, *J* = 278.0 Hz), 124.1, 123.4, 70.1 (q, *J* = 31.0 Hz), 49.3, 29.2, 22.9, 21.8, 21.6; <sup>19</sup>F NMR (376 Hz, CDCl<sub>3</sub>) δ = -78.12 (s, 3F); HRMS(ESI) calcd for C<sub>27</sub>H<sub>25</sub>F<sub>3</sub>NO<sub>2</sub>S (M+H)<sup>+</sup>: 484.1553, Found: 484.1550.

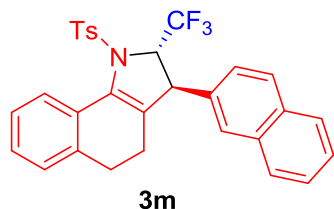

**3-(naphthalen-2-yl)-1-tosyl-2-(trifluoromethyl)-2,3,4,5-tetrahydro-1H-benzo[g]indole (3m):** white solid: mp 222.5-224.1 °C; <sup>1</sup>H NMR (400 MHz, CDCl<sub>3</sub>) δ = 7.93 (d, *J* = 7.2 Hz, 1H), 7.80 (t, *J* = 5.2 Hz, 1H), 7.64 (d, *J* = 8.4 Hz, 1H), 7.50 - 7.46 (m, 3H), 7.36 - 7.24 (m, 5H), 6.92 (d, *J* = 8.0 Hz, 2H), 6.86 (s, 1H), 6.81 (dd, *J* = 8.4, 2.0 Hz, 1H), 4.66 (qd, *J* = 7.2, 2.8 Hz, 1H), 4.02 (t, *J* = 2.4 Hz, 1H), 3.00 - 2.82 (m, 2H), 2.26 - 2.16 (m, 5H); <sup>13</sup>C NMR (100 MHz, CDCl<sub>3</sub>) δ = 144.7, 139.8, 136.6, 135.7, 133.1, 132.4, 130.4, 129.7, 128.9, 128.7, 128.2 (d, *J* = 3.0 Hz), 127.7, 127.4, 126.6, 126.4, 126.3, 126.1, 125.8, 125.4, 124.7 (d, *J* = 279.0 Hz), 70.1 (q, *J* = 31.0 Hz), 49.3, 29.2, 23.1, 21.7; <sup>19</sup>F NMR (376 Hz, CDCl<sub>3</sub>) δ = -78.13 (s, 3F); HRMS(ESI) calcd for C<sub>30</sub>H<sub>25</sub>F<sub>3</sub>NO<sub>2</sub>S (M+H)<sup>+</sup>: 520.1553, Found: 520.1552.

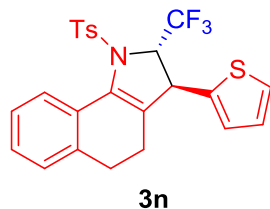

**3-(thiophen-2-yl)-1-tosyl-2-(trifluoromethyl)-2,3,4,5-tetrahydro-1H-benzo[g]indole (3n):** white oil; <sup>1</sup>H NMR (400 MHz, CDCl<sub>3</sub>) δ = 7.85 (dd, *J* = 7.2, 2.0 Hz, 1H), 7.31 - 7.24 (m, 5H), 7.11 - 7.09 (m, 3H), 6.68 (dd, *J* = 5.2, 3.6 Hz, 1H), 5.94 (dt, *J* = 3.6, 0.8 Hz, 1H), 4.62 (qd, *J* = 7.2, 2.4 Hz, 1H), 4.04 (d, *J* = 1.2 Hz, 1H), 2.88 - 2.78 (m, 2H), 2.42 (s, 3H), 2.27 - 2.21 (m, 2H); <sup>13</sup>C NMR (100 MHz, CDCl<sub>3</sub>) δ = 144.6, 142.3, 139.4, 135.8, 132.1, 130.0, 129.8, 128.6, 128.4, 128.3, 127.3, 126.9, 126.5, 125.9,



125.1, 124.7 (d,  $J = 278.0$  Hz), 124.6, 70.5 (q,  $J = 31.0$  Hz), 44.3, 29.2, 22.9, 21.7;  $^{19}\text{F}$  NMR (376 Hz,  $\text{CDCl}_3$ )  $\delta = -78.26$  (s, 3F); HRMS(ESI) calcd for  $\text{C}_{24}\text{H}_{21}\text{F}_3\text{NO}_2\text{S}_2$  ( $\text{M}+\text{H}$ ) $^+$ : 476.0960, Found: 476.0960.

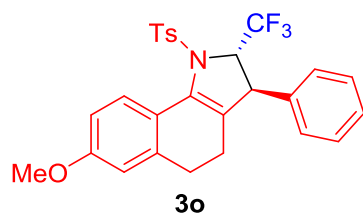

**7-methoxy-3-phenyl-1-tosyl-2-(trifluoromethyl)-2,3,4,5-tetrahydro-1H-benzo[g]indole (3o)**: white solid: mp 208.5-209.0 °C;  $^1\text{H}$  NMR (400 MHz,  $\text{CDCl}_3$ )  $\delta = 7.84$  (d,  $J = 8.4$  Hz, 1H), 7.30 - 7.27 (m, 2H), 7.16 (tt,  $J = 7.6, 1.2$  Hz, 1H), 7.10 (d,  $J = 8.0$  Hz, 2H), 7.07 - 7.03 (m, 2H), 6.85 - 6.80 (m, 2H), 6.44 (d,  $J = 6.8$  Hz, 2H), 4.46 (qd,  $J = 7.2, 3.2$  Hz, 1H), 3.86 (s, 3H), 3.83 (t,  $J = 2.8$  Hz, 1H), 2.88 - 2.72 (m, 2H), 2.46 (s, 3H), 2.22 - 2.00 (m, 2H);  $^{13}\text{C}$  NMR (100 MHz,  $\text{CDCl}_3$ )  $\delta = 159.5, 144.5, 139.3, 137.8, 132.2, 129.9, 128.8, 128.7, 127.6, 127.3, 127.2, 127.0, 124.7$  (d,  $J = 279.0$  Hz), 121.6, 114.1, 110.5, 70.2 (q,  $J = 31.0$  Hz), 55.4, 49.2, 29.6, 22.8, 21.8;  $^{19}\text{F}$  NMR (376 Hz,  $\text{CDCl}_3$ )  $\delta = -78.19$  (s, 3F); HRMS(ESI) calcd for  $\text{C}_{27}\text{H}_{25}\text{F}_3\text{NO}_3\text{S}$  ( $\text{M}+\text{H}$ ) $^+$ : 500.1502, Found: 500.1500.

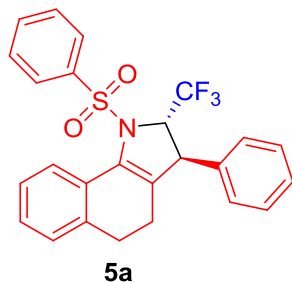

**3-phenyl-1-(phenylsulfonyl)-2-(trifluoromethyl)-2,3,4,5-tetrahydro-1H-benzo[g]indole (5a)**: pale yellow oil;  $^1\text{H}$  NMR (400 MHz,  $\text{CDCl}_3$ )  $\delta = 7.86$  (dd,  $J = 7.2, 1.6$  Hz, 1H), 7.62 (tt,  $J = 7.6, 1.2$  Hz, 1H), 7.44 - 7.42 (m, 2H), 7.37 - 7.23 (m, 5H), 7.16 (tt,  $J = 7.2, 1.2$  Hz, 1H), 7.10 - 7.06 (m, 2H), 6.47 - 6.44 (m, 2H), 4.53 (qd,  $J = 7.2, 3.2$  Hz, 1H), 3.86 (t,  $J = 2.8$  Hz, 1H), 2.88 - 2.76 (m, 2H), 2.24 - 2.01 (m, 2H);  $^{13}\text{C}$  NMR (100 MHz,  $\text{CDCl}_3$ )  $\delta = 139.5, 139.0, 135.7, 135.5, 133.7, 130.7, 129.3, 129.1, 128.8, 128.6, 128.2, 127.4, 127.3, 126.5, 125.6, 124.7$  (d,  $J = 280.0$  Hz), 70.1 (q,  $J = 31.0$  Hz), 49.4, 29.2, 22.9;  $^{19}\text{F}$  NMR (376 Hz,  $\text{CDCl}_3$ )  $\delta = -78.17$  (s, 3F); HRMS(ESI) calcd for  $\text{C}_{25}\text{H}_{21}\text{F}_3\text{NO}_2\text{S}$  ( $\text{M}+\text{H}$ ) $^+$ : 456.1240, Found: 456.1242.

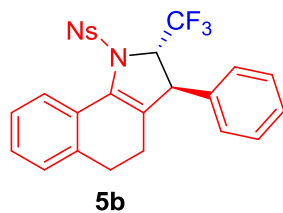

**1-((4-nitrophenyl)sulfonyl)-3-phenyl-2-(trifluoromethyl)-2,3,4,5-tetrahydro-1H-benzo[g]indole (5b)**: pale yellow solid: mp 215.0-216.0 °C;  $^1\text{H}$  NMR (400 MHz,  $\text{CDCl}_3$ )  $\delta = 8.07 - 8.03$  (m, 2H), 7.85 - 7.82 (m, 1H), 7.56 - 7.53 (m, 2H), 7.36 - 7.27

(m, 3H), 7.17 (tt,  $J = 7.2, 1.6$  Hz, 1H), 7.06 - 7.02 (m, 2H), 6.54 (d,  $J = 7.2$  Hz, 2H), 4.57 (qd,  $J = 6.8, 2.4$  Hz, 1H), 3.90 (t,  $J = 2.4$  Hz, 1H), 2.95 - 2.87 (m, 2H), 2.32 - 2.15 (m, 2H);  $^{13}\text{C}$  NMR (100 MHz,  $\text{CDCl}_3$ )  $\delta = 150.8, 140.5, 139.3, 138.8, 135.6, 131.4, 129.7, 129.1, 128.7, 127.0, 127.6, 127.5, 126.7, 125.6, 124.3$  (d,  $J = 279.0$  Hz), 124.2, 70.8 (q,  $J = 31.0$  Hz), 48.6, 29.1, 23.3;  $^{19}\text{F}$  NMR (376 Hz,  $\text{CDCl}_3$ )  $\delta = -78.35$  (s, 3F); HRMS(ESI) calcd for  $\text{C}_{25}\text{H}_{20}\text{F}_3\text{N}_2\text{O}_4\text{S}$  ( $\text{M}+\text{H}$ ) $^+$ : 501.1090, Found: 501.1098.

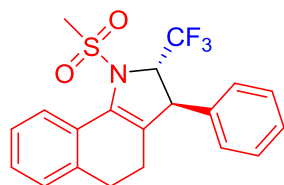

5c

**1-(methylsulfonyl)-3-phenyl-2-(trifluoromethyl)-2,3,4,5-tetrahydro-1H-benzo[g]indole (5c):** pale yellow solid: mp 221.3-224.1 °C;  $^1\text{H}$  NMR (400 MHz,  $\text{CDCl}_3$ )  $\delta = 7.56$  (d,  $J = 7.2$  Hz, 1H), 7.45 - 7.41 (m, 2H), 7.37 - 7.33 (m, 3H), 7.29 - 7.24 (m, 3H), 4.81 (q,  $J = 7.6$  Hz, 1H), 4.00 (s, 1H), 3.12 - 3.03 (m, 1H), 3.01 (s, 3H), 2.89 - 2.84 (m, 1H), 2.41 - 2.25 (m, 2H);  $^{13}\text{C}$  NMR (100 MHz,  $\text{CDCl}_3$ )  $\delta = 139.1, 139.0, 135.7, 130.1, 129.5, 128.7, 127.8, 127.7, 126.5, 124.9$  (d,  $J = 279.0$  Hz), 124.3, 70.0 (q,  $J = 31.0$  Hz), 49.9, 40.2, 29.0, 22.7;  $^{19}\text{F}$  NMR (376 Hz,  $\text{CDCl}_3$ )  $\delta = -78.48$  (s, 3F); HRMS(ESI) calcd for  $\text{C}_{20}\text{H}_{19}\text{F}_3\text{NO}_2\text{S}$  ( $\text{M}+\text{H}$ ) $^+$ : 394.1083, Found: 394.1085.

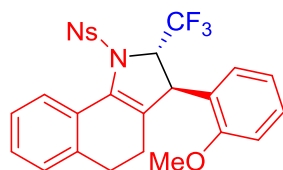

5d

**3-(2-methoxyphenyl)-1-((4-nitrophenyl)sulfonyl)-2-(trifluoromethyl)-2,3,4,5-tetrahydro-1H-benzo[g]indole (5d):** pale yellow solid: mp 216.8-217.7 °C;  $^1\text{H}$  NMR (400 MHz,  $\text{CDCl}_3$ )  $\delta = 7.96$  (d,  $J = 8.8$  Hz, 2H), 7.85 (d,  $J = 6.8$  Hz, 1H), 7.50 (d,  $J = 8.8$  Hz, 2H), 7.35 - 7.26 (m, 3H), 7.14 (t,  $J = 8.8$  Hz, 1H), 6.82 (d,  $J = 8.0$  Hz, 1H), 6.28 (t,  $J = 7.2$  Hz, 1H), 5.96 (d,  $J = 7.2$  Hz, 1H), 4.68 (qd,  $J = 6.8, 1.6$  Hz, 1H), 3.96 (s, 1H), 3.86 (s, 3H), 2.84 - 3.00 (m, 2H), 2.34 - 2.16 (m, 2H);  $^{13}\text{C}$  NMR (100 MHz,  $\text{CDCl}_3$ )  $\delta = 156.8, 150.7, 141.4, 139.0, 135.6, 132.0, 129.2, 128.7, 128.5, 128.0, 127.6, 126.8, 126.7, 126.5, 125.4, 124.5$  (d,  $J = 281.0$  Hz), 124.0, 120.1, 110.4, 69.8 (q,  $J = 31.0$  Hz), 55.3, 43.6, 29.0, 23.4;  $^{19}\text{F}$  NMR (376 Hz,  $\text{CDCl}_3$ )  $\delta = -78.33$  (s, 3F); HRMS(ESI) calcd for  $\text{C}_{26}\text{H}_{22}\text{F}_3\text{N}_2\text{O}_5\text{S}$  ( $\text{M}+\text{H}$ ) $^+$ : 531.1196, Found: 531.1196.

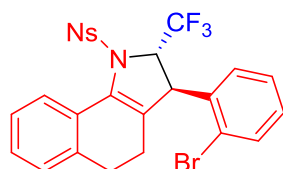

5e

**3-(2-bromophenyl)-1-((4-nitrophenyl)sulfonyl)-2-(trifluoromethyl)-2,3,4,5-tetrahydro-1H-benzo[g]indole (5e):** pale yellow oil;  $^1\text{H}$  NMR (400 MHz,  $\text{CDCl}_3$ )  $\delta = 8.21$

(d,  $J = 7.6$  Hz, 2H), 7.80 (d,  $J = 7.6$  Hz, 2H), 7.61 (d,  $J = 8.0$  Hz, 1H), 7.42 (d,  $J = 7.6$  Hz, 1H), 7.30 - 7.20 (m, 4H), 7.10 (t,  $J = 7.6$  Hz, 1H), 6.88 (t,  $J = 7.6$  Hz, 1H), 6.50 (d,  $J = 7.6$  Hz, 1H), 4.87 (q,  $J = 6.4$  Hz, 1H), 4.27 (s, 1H), 2.97 - 2.81 (m, 2H), 2.37 - 2.01 (m, 2H);  $^{13}\text{C}$  NMR (100 MHz,  $\text{CDCl}_3$ )  $\delta = 150.8, 143.5, 139.2, 137.3, 135.7, 134.0, 131.7, 129.6, 129.5, 128.9, 128.6, 127.8$  (d,  $J = 3.5$  Hz), 126.6, 124.6, 124.4 (d,  $J = 280.4$  Hz), 124.3, 124.2, 69.3 (q,  $J = 32.0$  Hz), 48.6, 29.1, 22.7;  $^{19}\text{F}$  NMR (376 Hz,  $\text{CDCl}_3$ )  $\delta = -76.04$  (s, 3F); HRMS(ESI) calcd for  $\text{C}_{25}\text{H}_{19}\text{BrF}_3\text{N}_2\text{O}_4\text{S}$  ( $\text{M}+\text{H}$ ) $^+$ : 579.0196, Found: 579.0192.

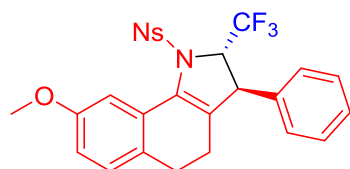

5f

**8-methoxy-1-((4-nitrophenyl)sulfonyl)-3-phenyl-2-(trifluoromethyl)-2,3,4,5-tetrahydro-1H-benzo[g]indole (5f):** pale yellow solid; mp 227.8-228.5 °C;  $^1\text{H}$  NMR (400 MHz,  $\text{CDCl}_3$ )  $\delta = 8.07 - 8.04$  (m, 2H), 7.56 - 7.52 (m, 2H), 7.41 (d,  $J = 2.4$  Hz, 1H), 7.19 - 7.15 (m, 2H), 7.06 - 7.02 (m, 2H), 6.86 (dd,  $J = 8.4, 2.8$  Hz, 1H), 6.52 (d,  $J = 6.8$  Hz, 2H), 4.57 (qd,  $J = 6.8, 2.4$  Hz, 1H), 3.89 (t,  $J = 2.0$  Hz, 1H), 3.87 (s, 3H), 2.85 - 2.74 (m, 2H), 2.29 - 2.13 (m, 2H);  $^{13}\text{C}$  NMR (100 MHz,  $\text{CDCl}_3$ )  $\delta = 158.3, 150.8, 140.6, 139.3, 138.8, 131.9, 129.7, 129.1, 128.7, 127.6, 126.7, 124.3$  (d,  $J = 279.0$  Hz), 124.2, 114.5, 111.2, 70.9 (q,  $J = 31.0$  Hz), 55.6, 48.6, 28.2, 23.6;  $^{19}\text{F}$  NMR (376 Hz,  $\text{CDCl}_3$ )  $\delta = -78.33$  (s, 3F); HRMS(ESI) calcd for  $\text{C}_{26}\text{H}_{22}\text{F}_3\text{N}_2\text{O}_5\text{S}$  ( $\text{M}+\text{H}$ ) $^+$ : 531.1196, Found: 531.1196.

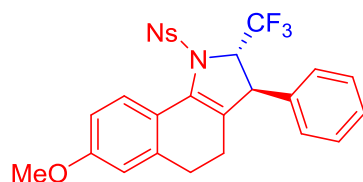

5g

**7-methoxy-1-((4-nitrophenyl)sulfonyl)-3-phenyl-2-(trifluoromethyl)-2,3,4,5-tetrahydro-1H-benzo[g]indole (5g):** pale yellow solid;  $^1\text{H}$  NMR (400 MHz,  $\text{CDCl}_3$ )  $\delta = 8.04$  (d,  $J = 8.8$  Hz, 2H), 7.80 (d,  $J = 8.4$  Hz, 1H), 7.52 (d,  $J = 8.4$  Hz, 2H), 7.16 (t,  $J = 7.6$  Hz, 1H), 7.04 - 7.01 (m, 2H), 6.85 (d,  $J = 7.6$  Hz, 2H), 6.51 (d,  $J = 7.6$  Hz, 2H), 4.54 (qd,  $J = 7.2, 2.4$  Hz, 1H), 3.87 (s, 4H), 2.92 - 2.80 (m, 2H), 2.30 - 2.12 (m, 2H);  $^{13}\text{C}$  NMR (100 MHz,  $\text{CDCl}_3$ )  $\delta = 159.9, 150.7, 140.5, 139.0, 137.7, 129.7, 129.0, 128.2, 127.4, 127.1, 126.7, 124.3$  (d,  $J = 279.0$  Hz), 124.1, 120.8, 114.4, 110.8, 70.9 (q,  $J = 31.0$  Hz), 55.5, 48.4, 29.5, 23.1;  $^{19}\text{F}$  NMR (376 Hz,  $\text{CDCl}_3$ )  $\delta = -78.33$  (s, 3F); HRMS(ESI) calcd for  $\text{C}_{26}\text{H}_{22}\text{F}_3\text{N}_2\text{O}_5\text{S}$  ( $\text{M}+\text{H}$ ) $^+$ : 531.1196, Found: 531.1199.

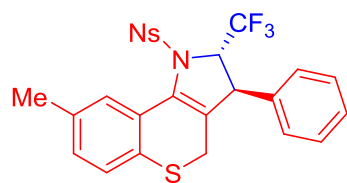

5h

**8-methyl-1-((4-nitrophenyl)sulfonyl)-3-phenyl-2-(trifluoromethyl)-1,2,3,4-tetrahydrothiochromeno[4,3-b]pyrrole (5h):** pale yellow solid: mp 213.5-218.0 °C; <sup>1</sup>H NMR (400 MHz, CDCl<sub>3</sub>) δ = 8.05 (d, *J* = 8.4 Hz, 2H), 7.63 (s, 1H), 7.45 (d, *J* = 8.4 Hz, 2H), 7.37 (d, *J* = 8.0 Hz, 1H), 7.20 - 7.13 (m, 2H), 7.06 (t, *J* = 7.6 Hz, 2H), 6.71 (d, *J* = 7.2 Hz, 2H), 4.60 (q, *J* = 6.8 Hz, 1H), 3.98 (s, 1H), 3.63 (d, *J* = 16.0 Hz, 1H), 2.85 (d, *J* = 16.4 Hz, 1H), 2.39 (s, 3H); <sup>13</sup>C NMR (100 MHz, CDCl<sub>3</sub>) δ = 150.9, 140.4, 137.7, 135.9, 130.2, 129.8, 129.3, 128.6, 128.5, 128.2, 127.8, 127.7, 126.8, 124.3, 124.2 (d, *J* = 279.0 Hz), 70.6 (q, *J* = 31.0 Hz), 49.0, 25.8, 21.3; <sup>19</sup>F NMR (376 Hz, CDCl<sub>3</sub>) δ = -78.38 (s, 3F); HRMS(ESI) calcd for C<sub>25</sub>H<sub>19</sub>NaF<sub>3</sub>N<sub>2</sub>O<sub>4</sub>S<sub>2</sub> (M+Na)<sup>+</sup>: 555.0631, Found: 555.0639.

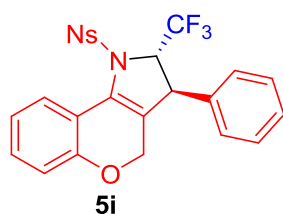

**1-((4-nitrophenyl)sulfonyl)-3-phenyl-2-(trifluoromethyl)-1,2,3,4-tetrahydrochromeno[4,3-b]pyrrole (5i):** yellow oil; <sup>1</sup>H NMR (400 MHz, CDCl<sub>3</sub>) δ = 8.06 (d, *J* = 7.6 Hz, 3H), 7.67 (s, 2H), 7.56 (t, *J* = 6.0 Hz, 1H), 7.43 - 7.32 (m, 2H), 3.80 (d, *J* = 16.8 Hz, 1H), 3.27 (d, *J* = 6.4 Hz, 1H), 2.94 (d, *J* = 16.8 Hz, 1H), 2.28 (t, *J* = 7.2 Hz, 1H); <sup>13</sup>C NMR (100 MHz, CDCl<sub>3</sub>) δ = 175.7, 149.7, 146.2, 136.8, 134.2, 128.7, 128.5, 128.0, 127.7, 126.9, 126.0, 124.5 (d, *J* = 273.0 Hz), 123.9, 34.0 (q, *J* = 41.0 Hz), 27.8, 27.7; <sup>19</sup>F NMR (376 Hz, CDCl<sub>3</sub>) δ = -58.31 (s, 3F); HRMS(ESI) calcd for C<sub>24</sub>H<sub>18</sub>F<sub>3</sub>N<sub>2</sub>O<sub>5</sub>S (M+H)<sup>+</sup>: 503.0883, Found: 503.0880.

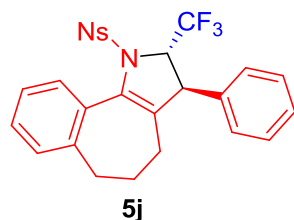

**1-((4-nitrophenyl)sulfonyl)-3-phenyl-2-(trifluoromethyl)-1,2,3,4,5,6-hexahydrobenzo[6,7]cyclohepta[1,2-b]pyrrole (5j):** pale yellow solid: mp 220.5-223.0 °C; <sup>1</sup>H NMR (400 MHz, CDCl<sub>3</sub>) δ = 8.12 (d, *J* = 8.4 Hz, 2H), 7.58 (d, *J* = 8.0 Hz, 2H), 7.31 - 7.23 (m, 6H), 7.09 (t, *J* = 7.6 Hz, 1H), 7.00 (d, *J* = 7.6 Hz, 2H), 4.83 (q, *J* = 7.6 Hz, 1H), 3.95 (s, 1H), 2.87 - 2.72 (m, 2H), 2.07 - 1.97 (m, 4H); <sup>13</sup>C NMR (100 MHz, CDCl<sub>3</sub>) δ = 150.6, 143.6, 141.5, 139.1, 137.2, 131.2, 130.5, 129.8, 129.3, 129.2, 128.8, 128.6, 128.0, 127.3, 125.7, 124.7 (d, *J* = 279.0 Hz), 124.1, 68.2 (q, *J* = 31.0 Hz), 52.4, 32.9, 32.7, 24.0; <sup>19</sup>F NMR (376 Hz, CDCl<sub>3</sub>) δ = -78.44 (s, 3F); HRMS(ESI) calcd for C<sub>26</sub>H<sub>22</sub>F<sub>3</sub>N<sub>2</sub>O<sub>4</sub>S (M+H)<sup>+</sup>: 515.1247, Found: 515.1246.

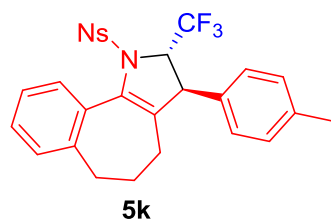

**1-((4-nitrophenyl)sulfonyl)-3-(p-tolyl)-2-(trifluoromethyl)-1,2,3,4,5,6-hexahydrobenzo[6,7]cyclohepta[1,2-b]pyrrole (5k):** pale yellow solid: mp 131.2-132.5 °C; <sup>1</sup>H NMR (400 MHz, CDCl<sub>3</sub>) δ = 8.11 (d, *J* = 8.8 Hz, 2H), 7.57 (d, *J* = 8.8 Hz, 2H), 7.29 - 7.24 (m, 3H), 7.10 (td, *J* = 7.2, 2.0 Hz, 1H), 7.03 (d, *J* = 8.0 Hz, 2H), 6.86 (d, *J* = 7.6 Hz, 2H), 4.78 (qd, *J* = 7.2, 2.4 Hz, 1H), 3.91 (s, 1H), 2.86 - 2.72 (m, 2H), 2.35 (s, 3H), 2.08 - 1.97 (m, 4H); <sup>13</sup>C NMR (100 MHz, CDCl<sub>3</sub>) δ = 150.5, 143.5, 141.4, 137.9, 137.0, 136.2, 131.3, 130.7, 129.9, 129.7, 129.2, 128.7, 128.6, 127.1, 125.7, 124.7 (d, *J* = 279.0 Hz), 124.0, 68.5 (q, *J* = 31.0 Hz), 52.0, 32.9, 32.8, 24.0, 21.1; <sup>19</sup>F NMR (376 Hz, CDCl<sub>3</sub>) δ = -78.43 (s, 3F); HRMS(ESI) calcd for C<sub>27</sub>H<sub>24</sub>F<sub>3</sub>N<sub>2</sub>O<sub>4</sub>S (M+H)<sup>+</sup>: 529.1403, Found: 529.1399.

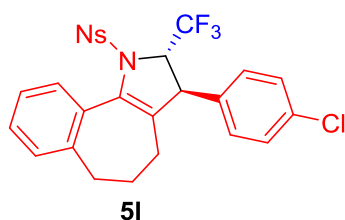

**3-(4-chlorophenyl)-1-((4-nitrophenyl)sulfonyl)-2-(trifluoromethyl)-1,2,3,4,5,6-hexahydrobenzo[6,7]cyclohepta[1,2-b]pyrrole (5l):** pale yellow solid: mp 201.8-202.7 °C; <sup>1</sup>H NMR (400 MHz, CDCl<sub>3</sub>) δ = 8.18 (d, *J* = 8.8 Hz, 2H), 7.63 (d, *J* = 8.8 Hz, 2H), 7.31 - 7.20 (m, 4H), 7.11 (d, *J* = 8.0 Hz, 2H), 6.99 - 6.93 (m, 2H), 4.90 (qd, *J* = 7.2, 2.0 Hz, 1H), 3.92 (s, 1H), 2.90 - 2.71 (m, 2H), 2.07 - 1.94 (m, 4H); <sup>13</sup>C NMR (100 MHz, CDCl<sub>3</sub>) δ = 150.6, 144.2, 141.7, 137.5, 137.3, 134.2, 130.8, 130.3, 129.8, 129.6, 129.3, 128.9, 128.1, 125.5, 124.7 (d, *J* = 279.0 Hz), 124.0, 67.5 (q, *J* = 36.0 Hz), 52.0, 32.8, 32.5, 23.8; <sup>19</sup>F NMR (376 Hz, CDCl<sub>3</sub>) δ = -78.42 (s, 3F); HRMS(ESI) calcd for C<sub>26</sub>H<sub>21</sub>ClF<sub>3</sub>N<sub>2</sub>O<sub>4</sub>S (M+H)<sup>+</sup>: 549.0857, Found: 549.0862.

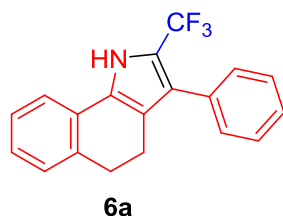

**3-phenyl-2-(trifluoromethyl)-2,3,4,5-tetrahydro-1H-benzo[g]indole (6a):** pale yellow solid: mp 252.3-254.6 °C; <sup>1</sup>H NMR (400 MHz, CDCl<sub>3</sub>) δ = 9.65 (s, 1H), 7.56 - 7.53 (m, 2H), 7.49 (t, *J* = 7.6 Hz, 2H), 7.41 - 7.35 (m, 2H), 7.29 - 7.25 (m, 2H), 7.24 - 7.20 (m, 1H), 2.97 - 2.93 (m, 2H), 2.87 - 2.83 (m, 2H); <sup>13</sup>C NMR (100 MHz, CDCl<sub>3</sub>) δ = 136.4, 133.9, 133.5, 132.4, 128.9, 128.7, 128.4, 127.8 (d, *J* = 1.9 Hz), 127.3, 127.1, 120.5, 118.9, 116.2, 97.9, 29.6, 20.7; <sup>19</sup>F NMR (376 Hz, CDCl<sub>3</sub>) δ = -78.27 (s, 3F); HRMS(ESI) calcd for C<sub>19</sub>H<sub>15</sub>F<sub>3</sub>N (M+H)<sup>+</sup>: 314.1151, Found: 314.1149.

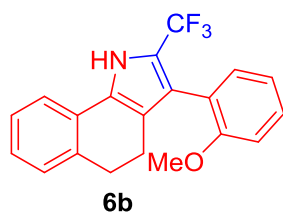

**3-(2-methoxyphenyl)-2-(trifluoromethyl)-4,5-dihydro-1H-benzo[g]indole (6b):** pale yellow solid: mp 222.7-223.2 °C; <sup>1</sup>H NMR (400 MHz, CDCl<sub>3</sub>) δ = 9.36 (s, 1H), 7.50 - 7.46 (m, 2H), 7.35 - 7.33 (m, 1H), 7.29 - 7.27 (m, 1H), 7.25 (s, 1H), 7.23 - 7.21 (m, 1H), 3.86 (s, 3H), 2.97 - 2.93 (m, 2H), 2.85 - 2.81 (m, 2H); <sup>13</sup>C NMR (100 MHz, CDCl<sub>3</sub>) δ = 159.3, 136.4, 133.7, 129.6, 128.7, 127.8, 127.4, 127.0, 124.8, 120.4, 118.8, 116.3, 114.4, 97.7, 55.4, 29.6, 20.7; <sup>19</sup>F NMR (376 Hz, CDCl<sub>3</sub>) δ = -78.18 (s, 3F); HRMS(ESI) calcd for C<sub>20</sub>H<sub>17</sub>F<sub>3</sub>NO (M+H)<sup>+</sup>:344.1257, Found: 344.1259.

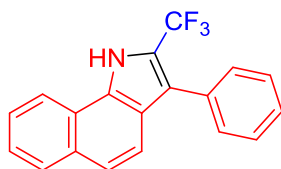

**7a**

**3-phenyl-2-(trifluoromethyl)-2,3-dihydro-1H-benzo[g]indole (7a):** pale yellow solid: mp 188.9-190.5 °C; <sup>1</sup>H NMR (400 MHz, CDCl<sub>3</sub>) δ = 9.79 (s, 1H), 8.18 (d, *J* = 8.4 Hz, 1H), 7.93 (d, *J* = 7.2 Hz, 1H), 7.63 - 7.58 (m, 4H), 7.56 - 7.47 (m, 4H), 7.44 - 7.39 (m, 1H); <sup>13</sup>C NMR (100 MHz, CDCl<sub>3</sub>) δ = 133.5, 132.4, 131.8, 130.7, 129.0, 128.0, 127.4, 126.2, 126.0, 124.1, 122.3, 121.6, 121.1, 120.6, 120.3; <sup>19</sup>F NMR (376 Hz, CDCl<sub>3</sub>) δ = -78.37 (s, 3F); HRMS(ESI) calcd for C<sub>19</sub>H<sub>13</sub>F<sub>3</sub>N (M+H)<sup>+</sup>: 312.0995, Found: 312.0990.

## b) References

- [1] J. Tian, R. Zhou, H. Y. Sun, H. B. Song, and Z. G. He, *J. Org. Chem.* **2011**, *76*, 7, 2374-2378.
- [2] S. P. Midya, E. Gopi, N. Satam, *Org. Biomol. Chem.* **2017**, *15*, 3616-3627.
- [3] a) Y. Y. Duan, B. Zhou, J.-H. Lin, J.-C. Xiao, *Chem. Commun.* **2015**, *51*, 13127-13130. b) Q. X. Huang, Q. T. Zheng, Y. Y. Duan, J. H. Lin, J. C. Xiao, and X. Zhen, *J. Org. Chem.* **2017**, *82*, 8273-8281.

#### 4. $^1\text{H}$ NMR, $^{13}\text{C}$ NMR and $^{19}\text{F}$ NMR spectra

8.186  
8.183  
8.179  
8.166  
8.163  
8.159  
7.967  
7.963  
7.958  
7.951  
7.946  
7.942  
7.859  
7.855  
7.471  
7.467  
7.452  
7.448  
7.433  
7.430  
7.424  
7.415  
7.411  
7.397  
7.393  
7.390  
7.368  
7.360  
7.356  
7.352  
7.346  
7.337  
7.323  
7.317  
7.295  
7.292  
7.275  
7.272  
7.260  
7.256  
7.253  
7.207  
7.204  
7.188  
7.185  
2.984  
2.444

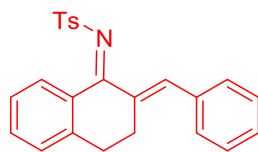

1a

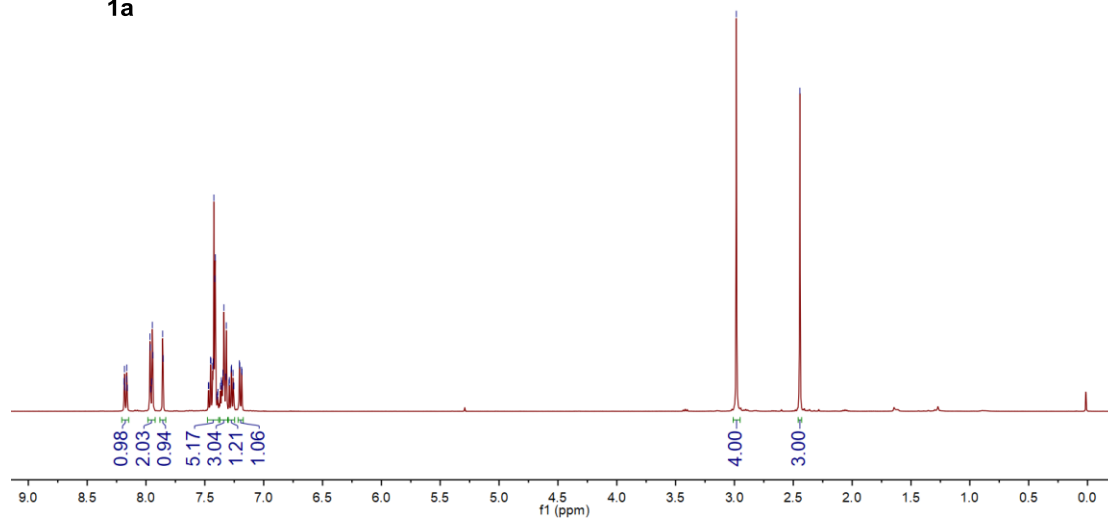

8.162  
8.142  
7.952  
7.931  
7.795  
7.471  
7.467  
7.452  
7.448  
7.433  
7.430  
7.419  
7.413  
7.405  
7.397  
7.388  
7.384  
7.337  
7.320  
7.316  
7.291  
7.288  
7.271  
7.260  
7.253  
7.250  
7.205  
7.186  
7.122  
7.116  
7.105  
7.100  
7.094  
7.083  
7.078  
7.071  
3.008  
2.999  
2.984  
2.973  
2.968  
2.961  
2.958  
2.946  
2.943  
2.935  
2.442

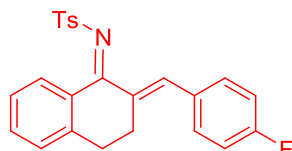

1b

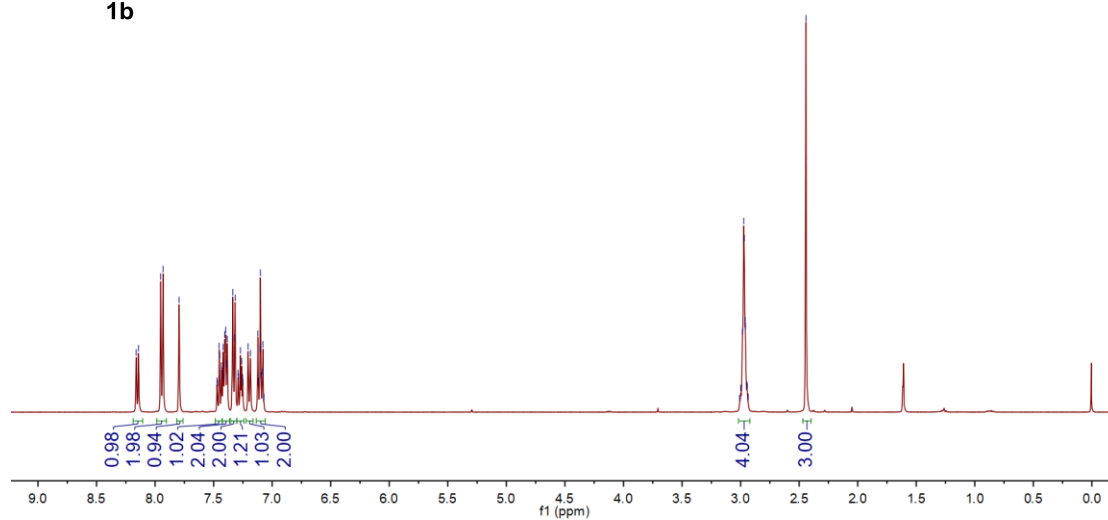

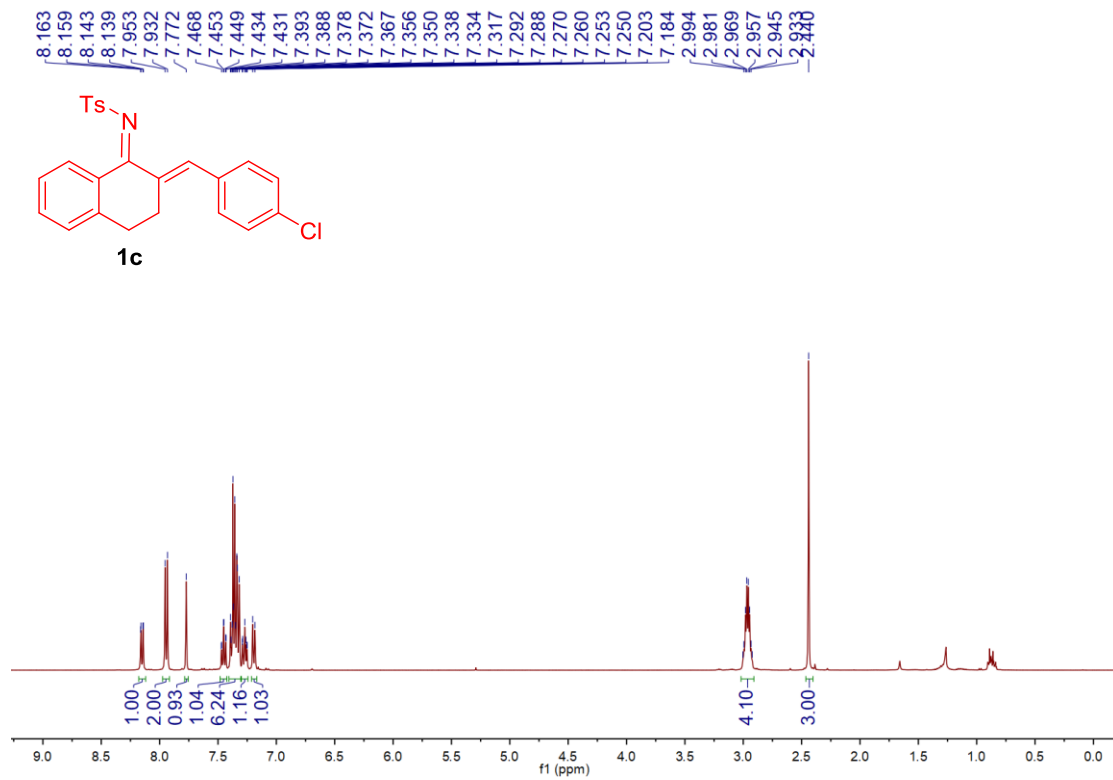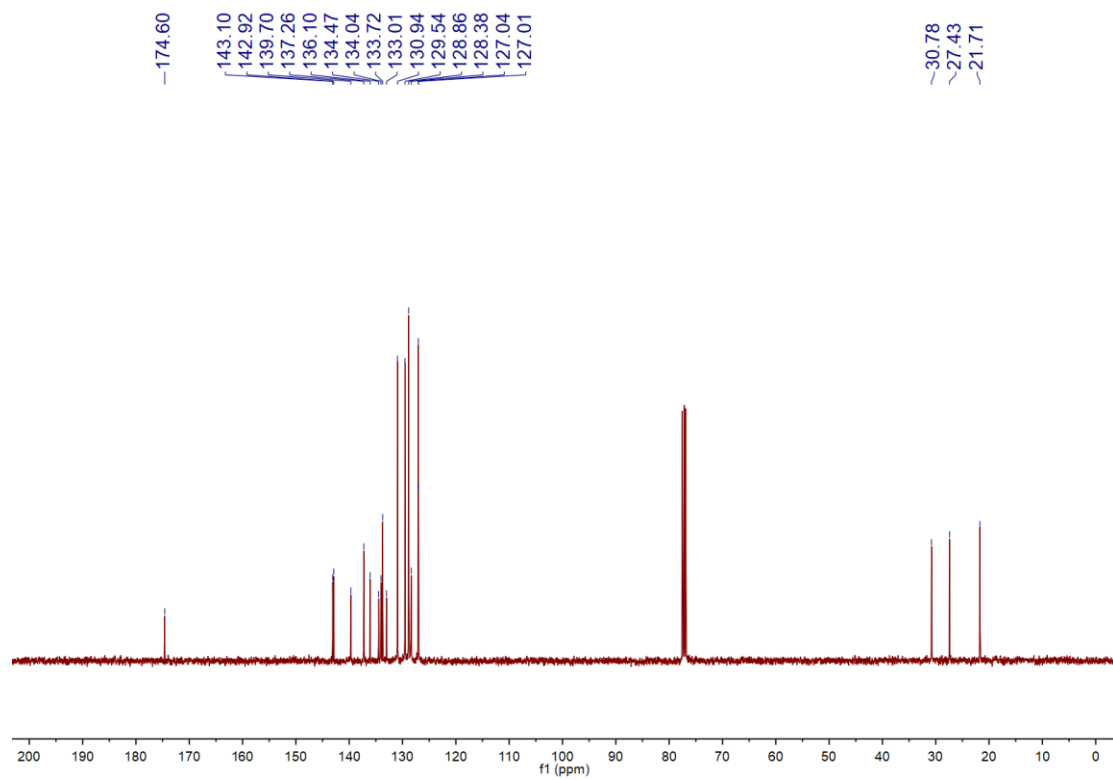



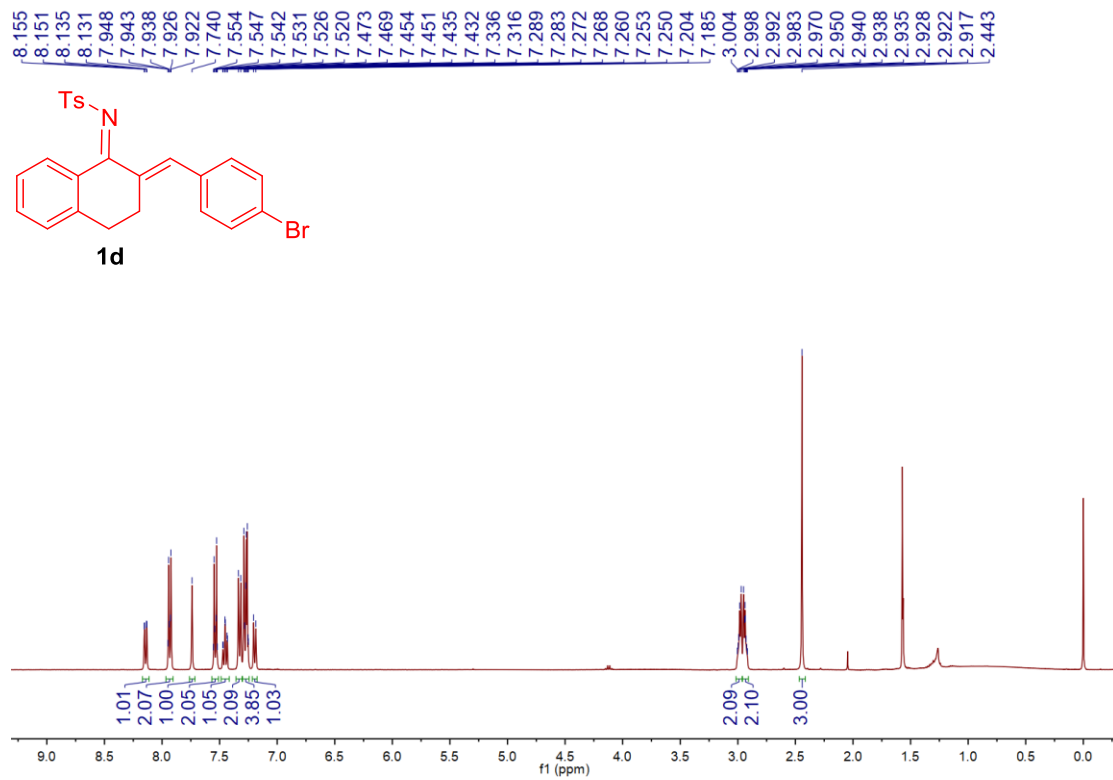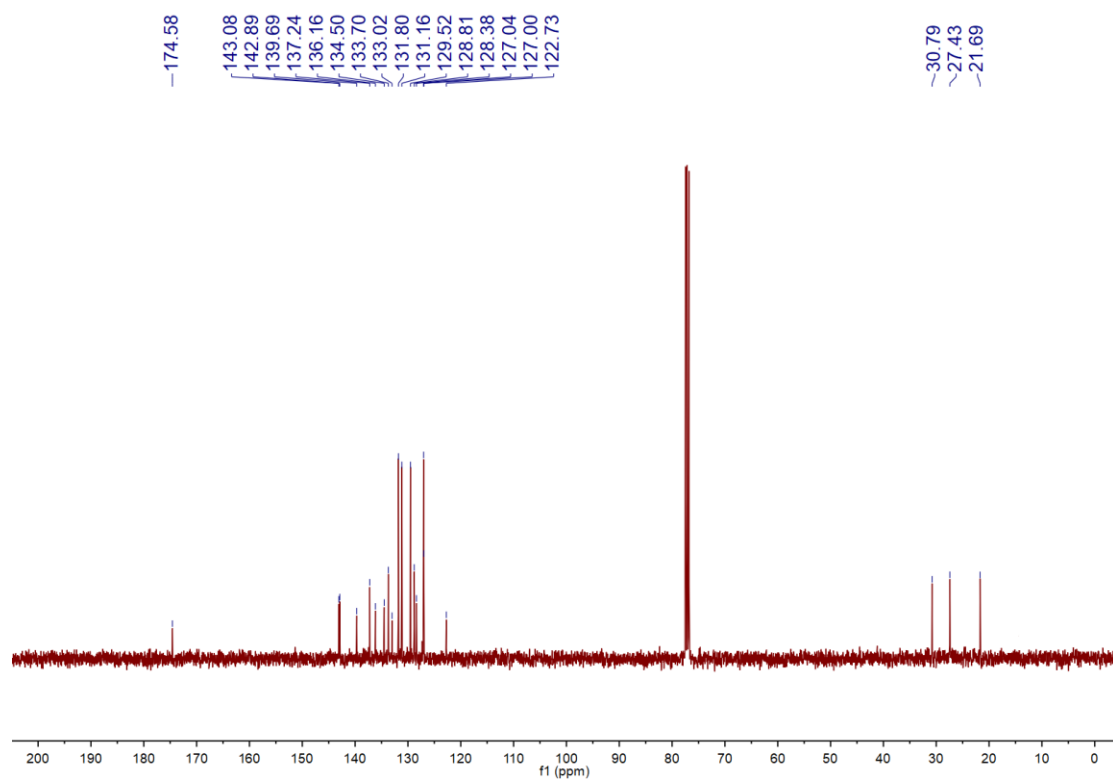

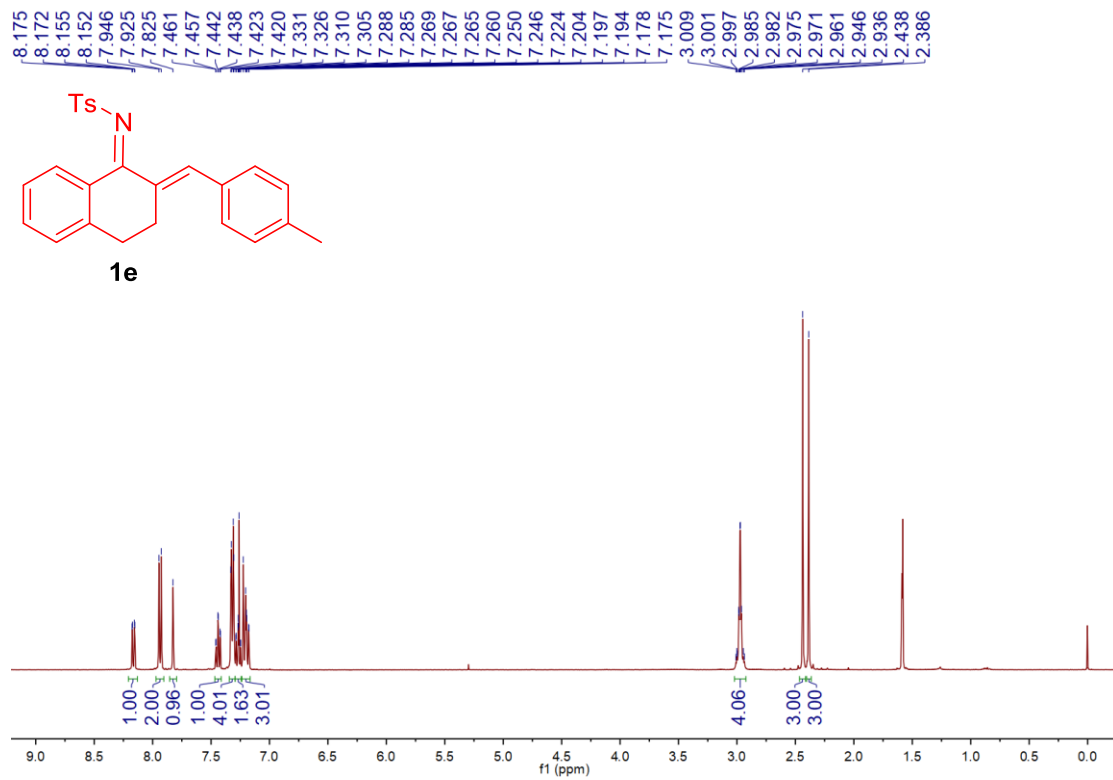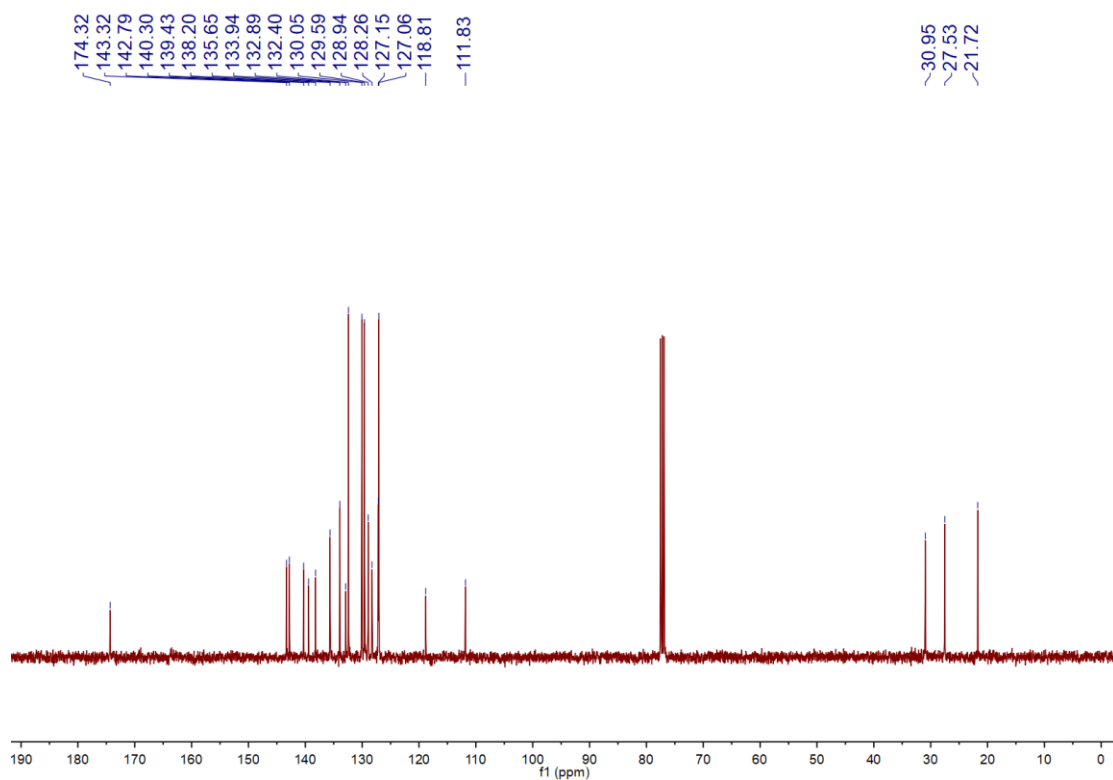

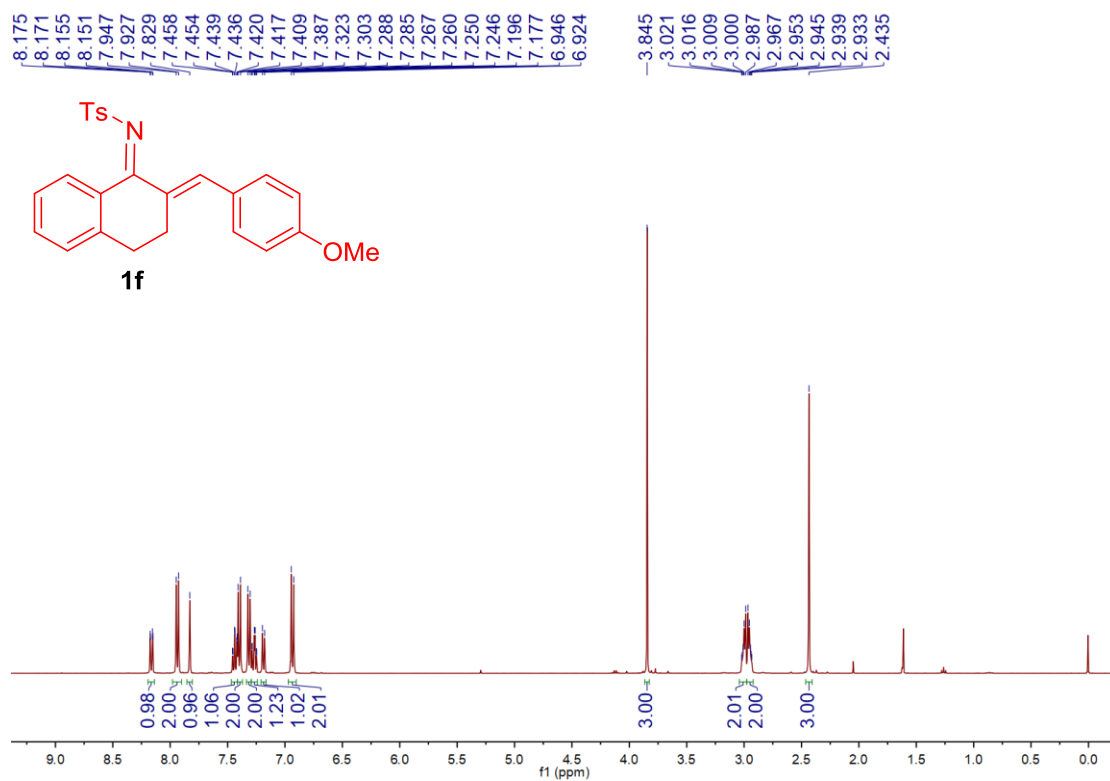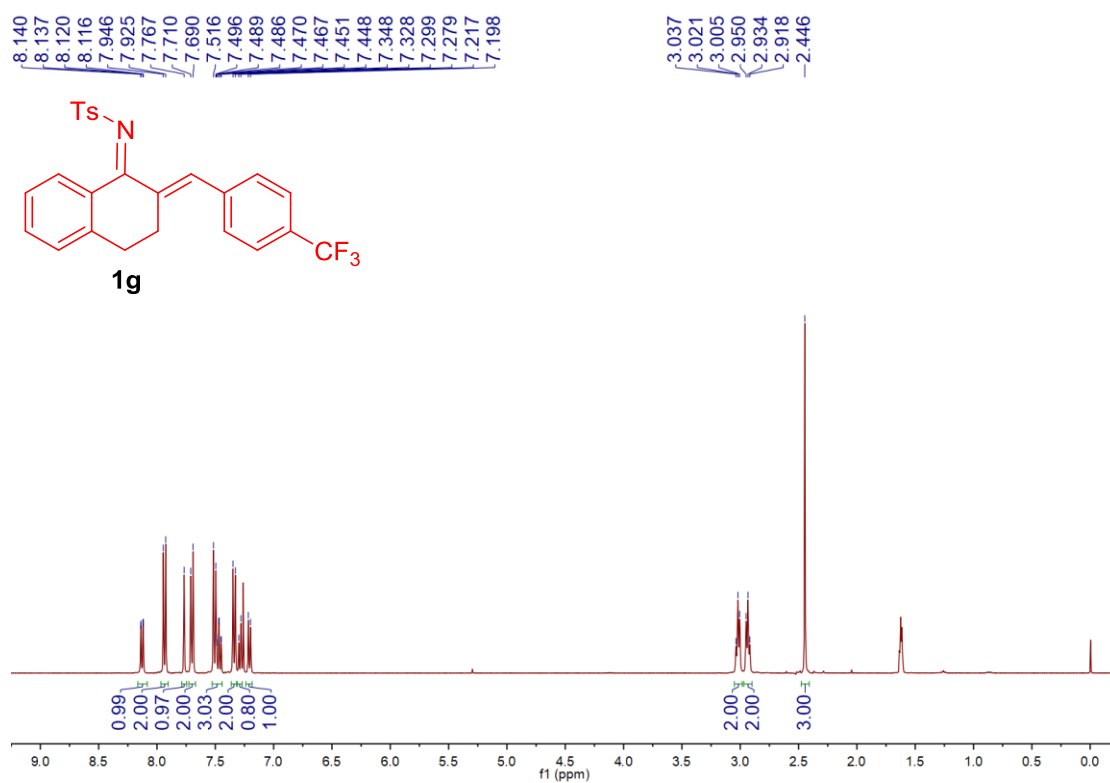

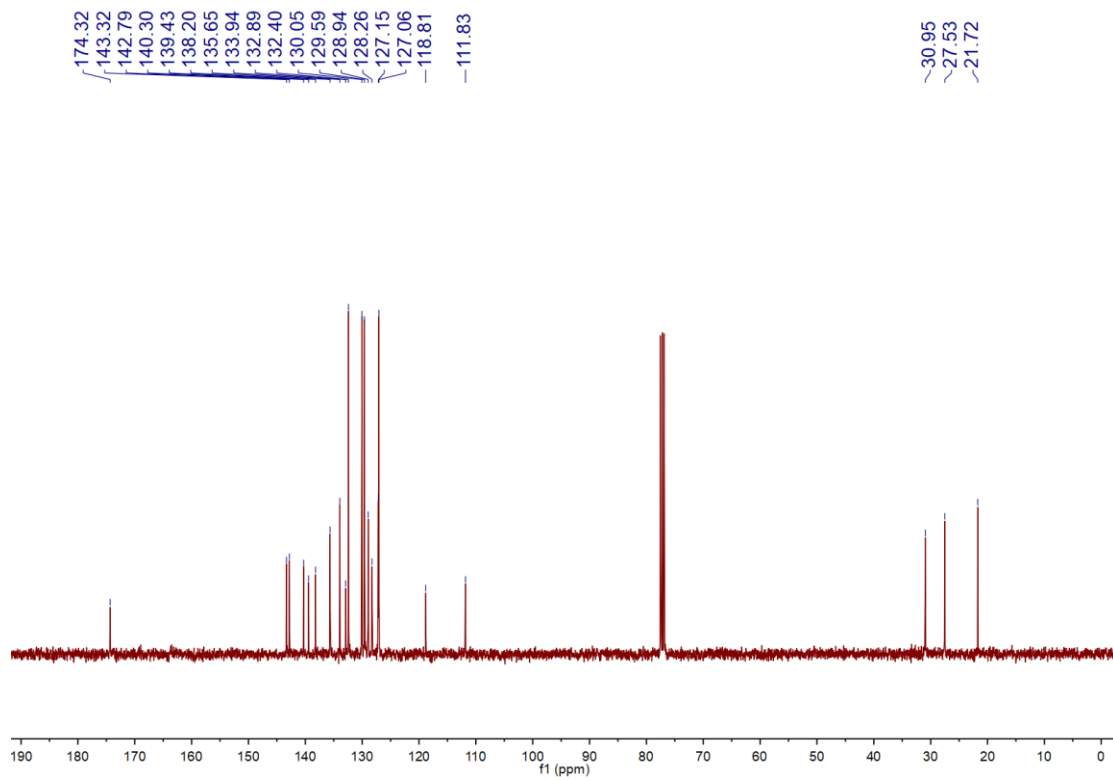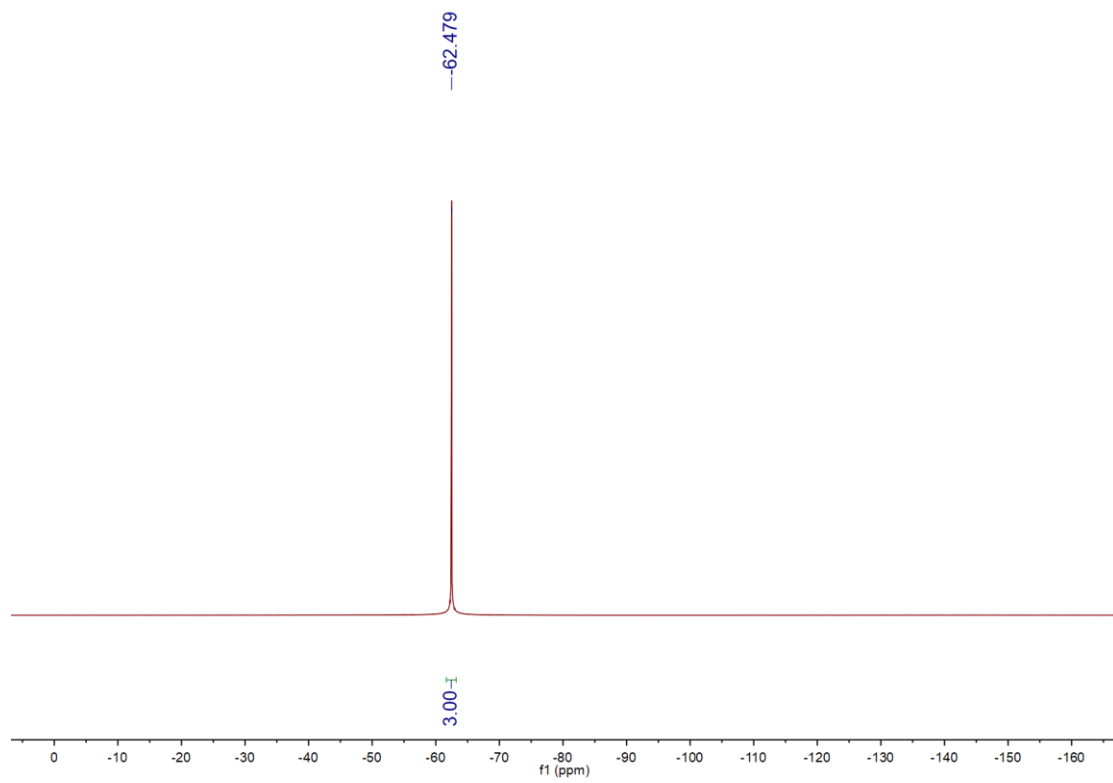

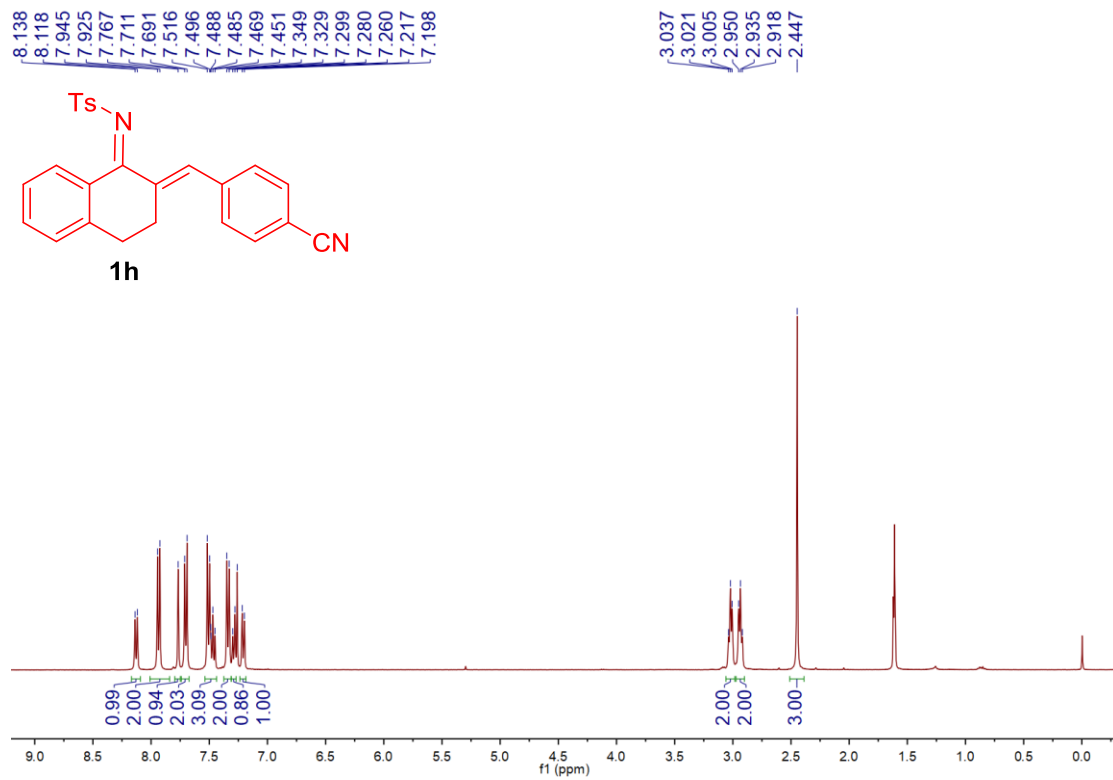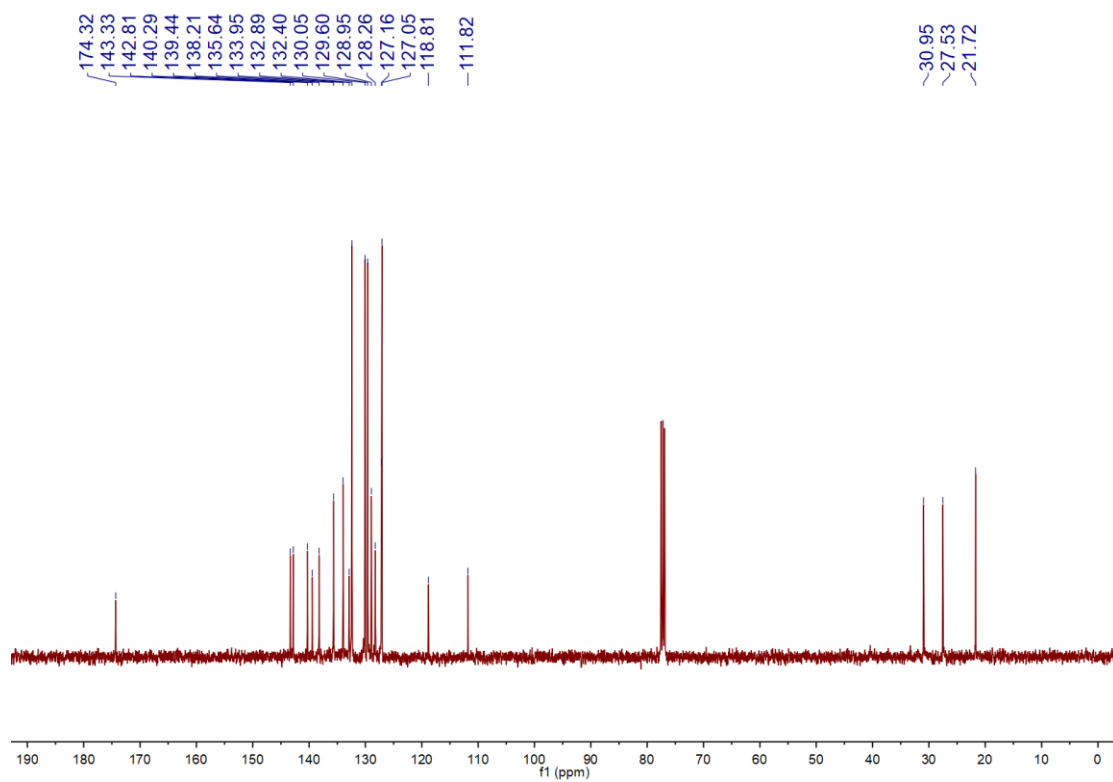

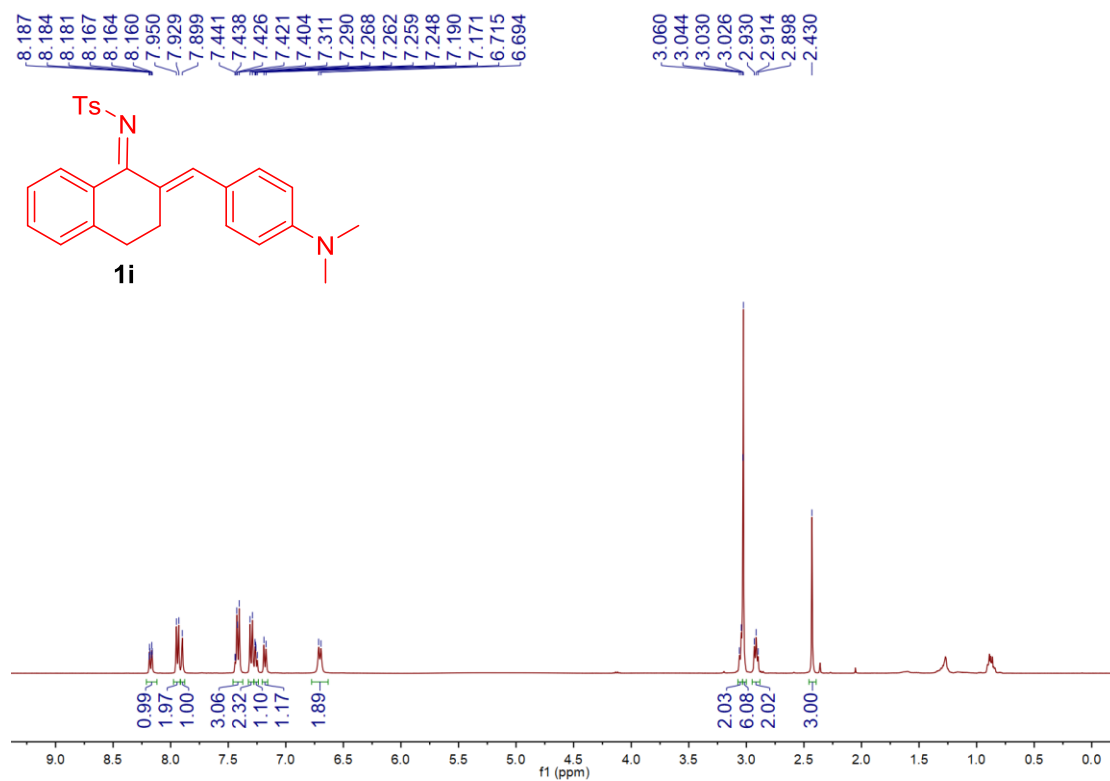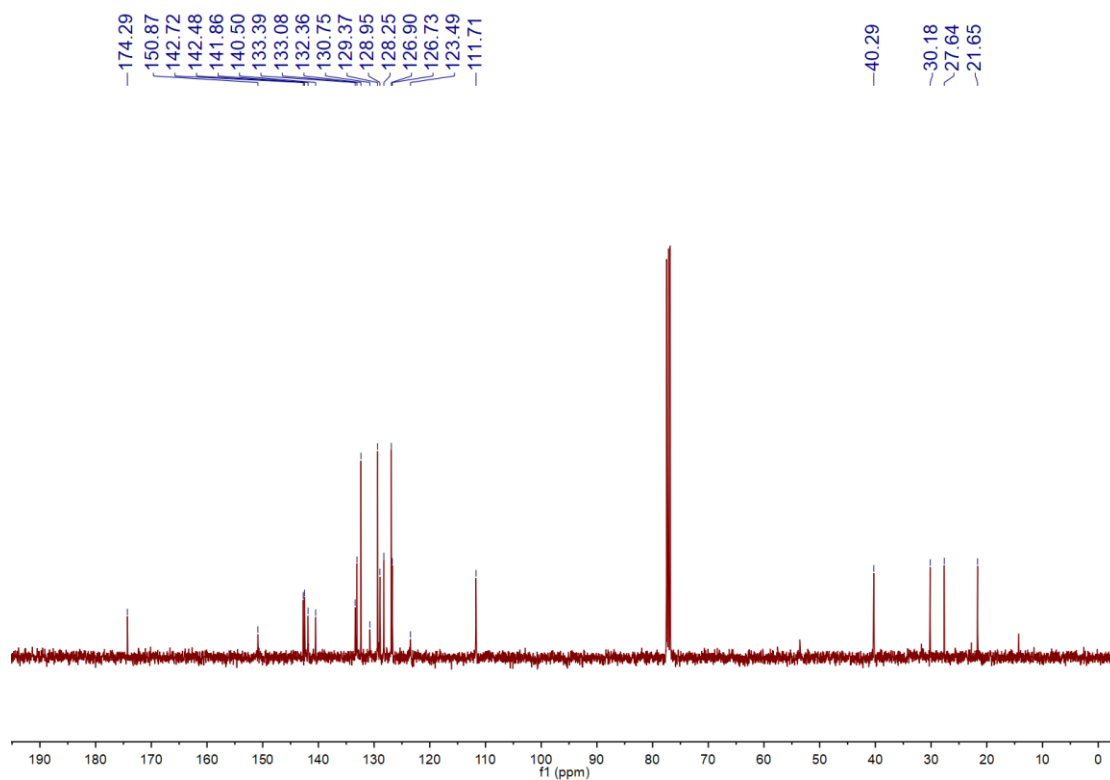

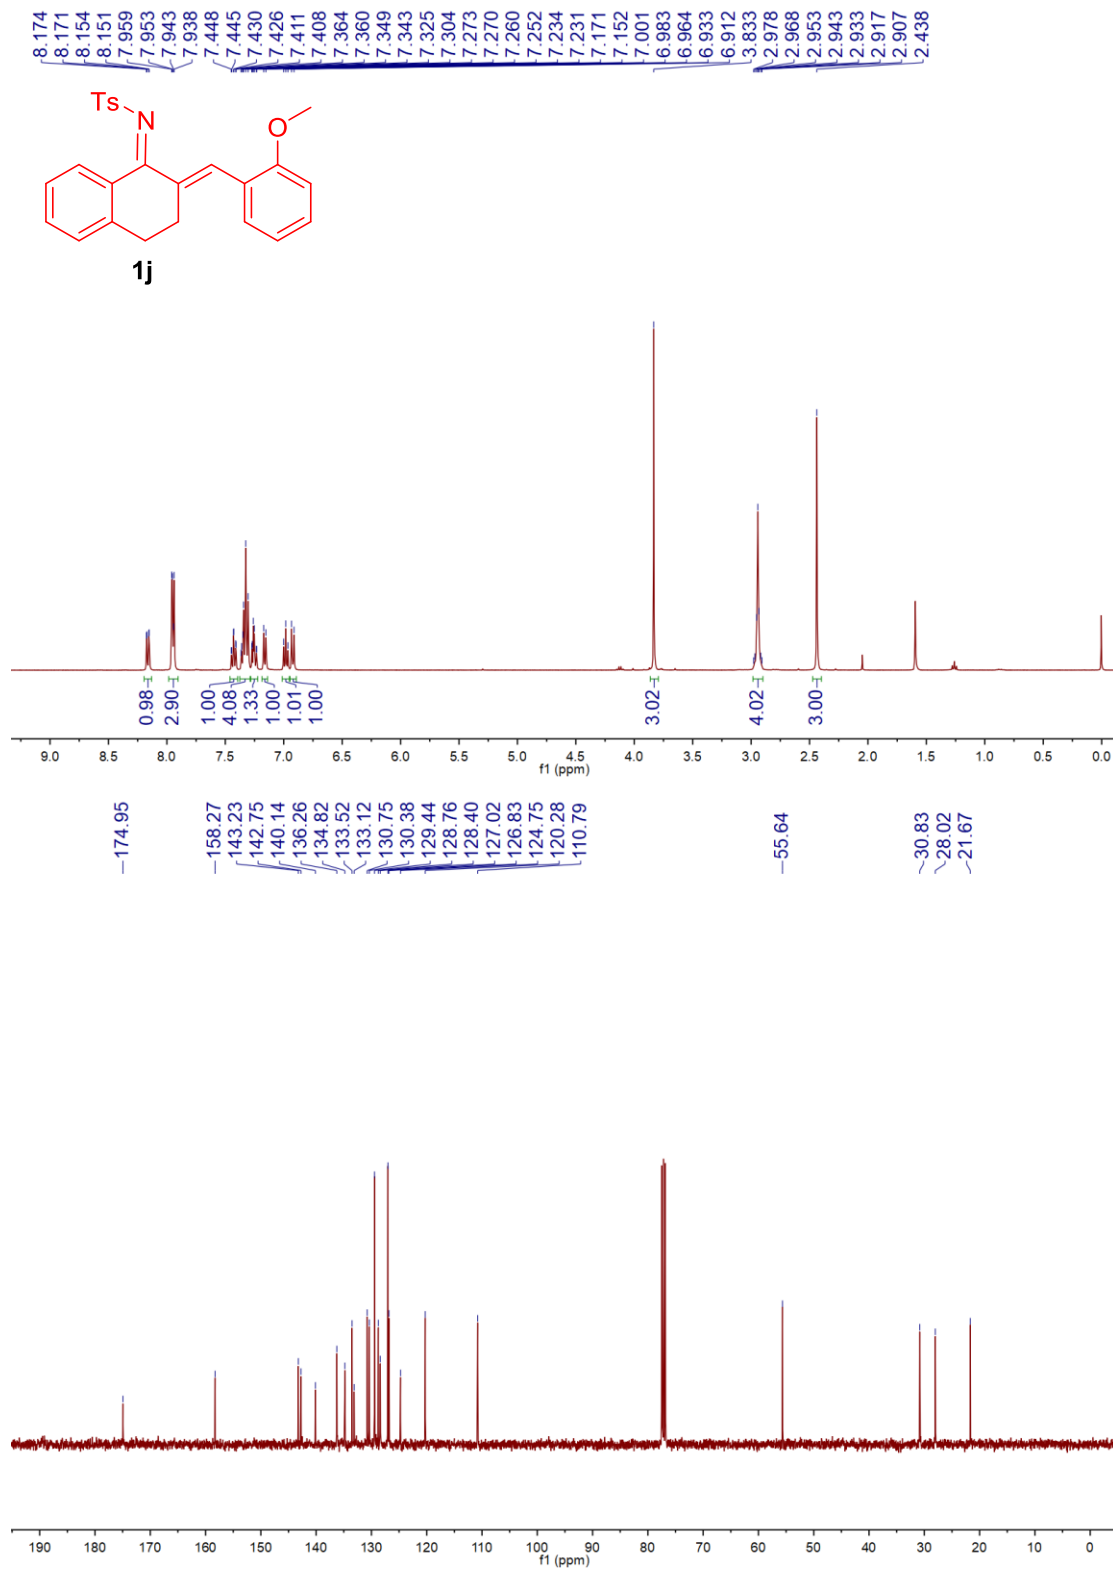

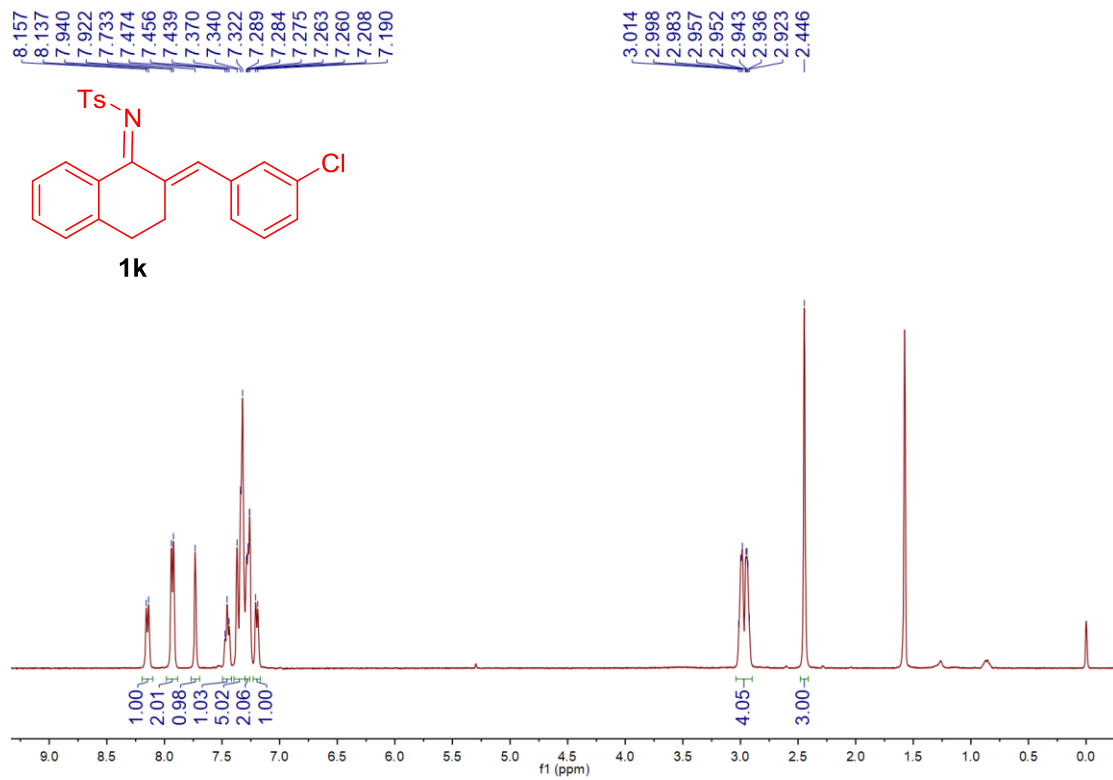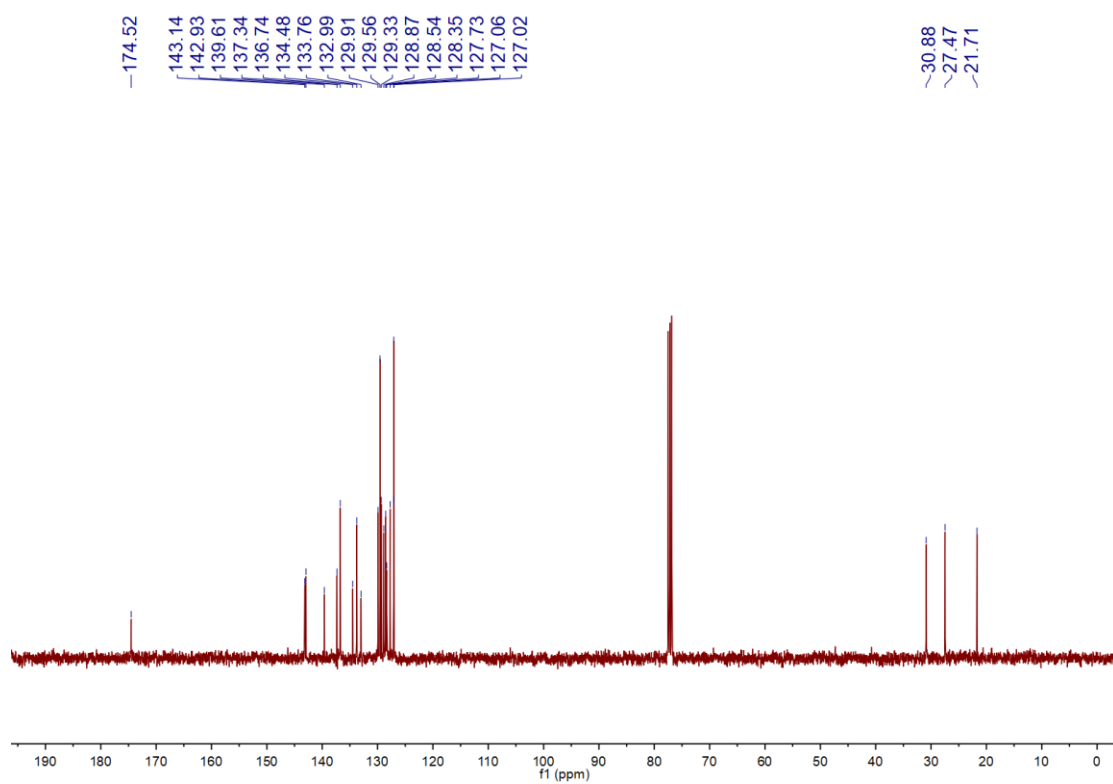



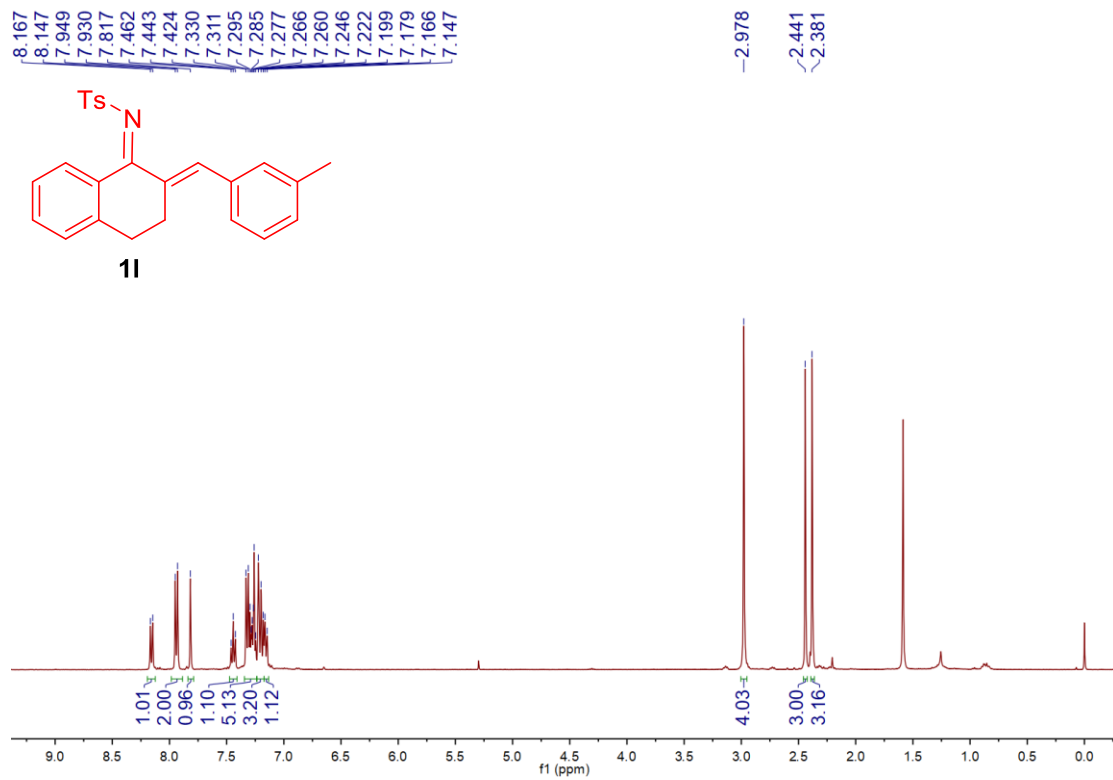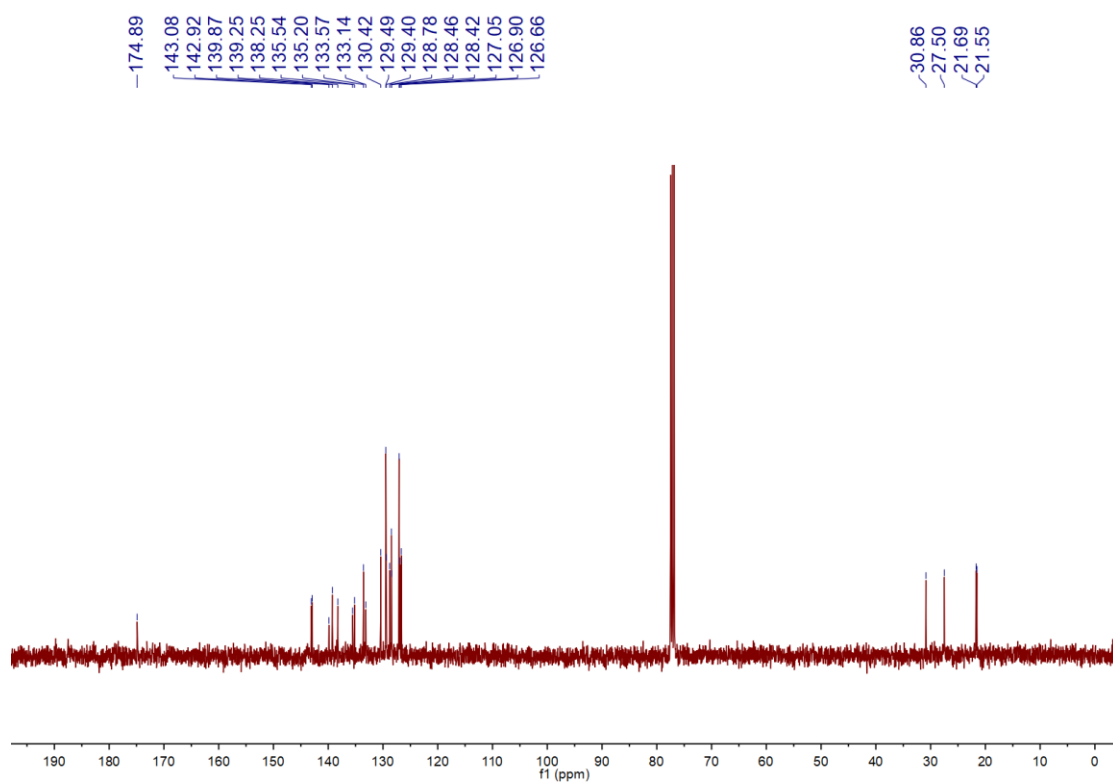

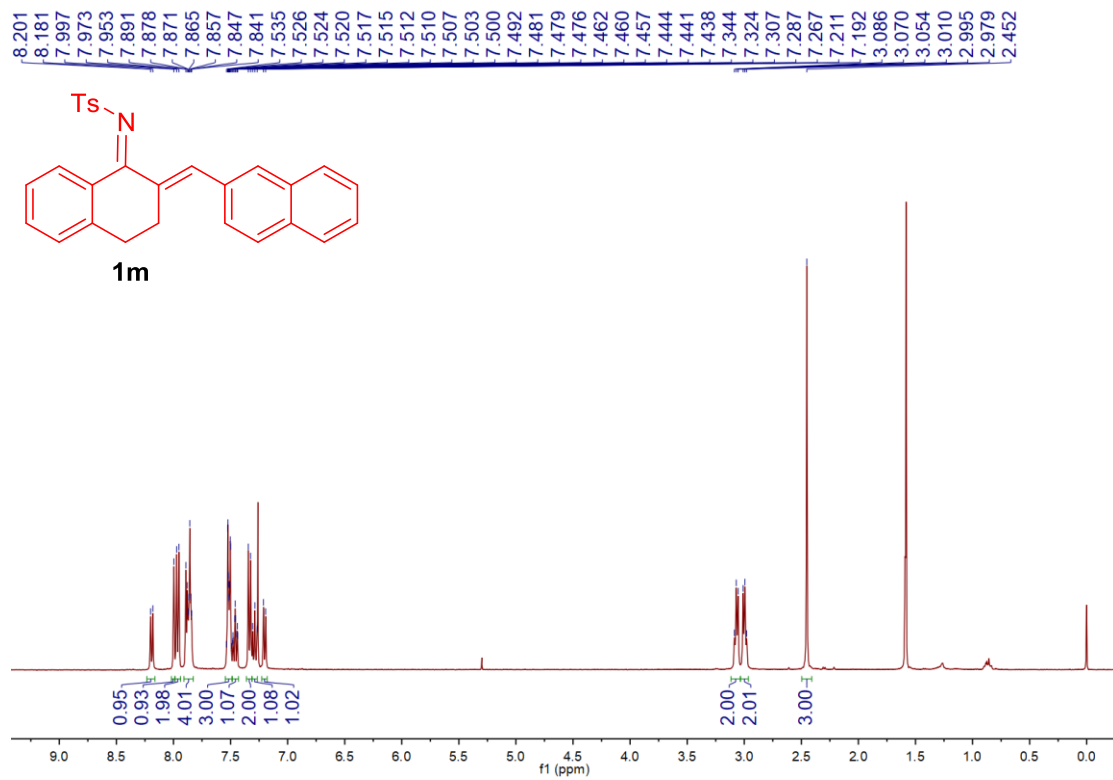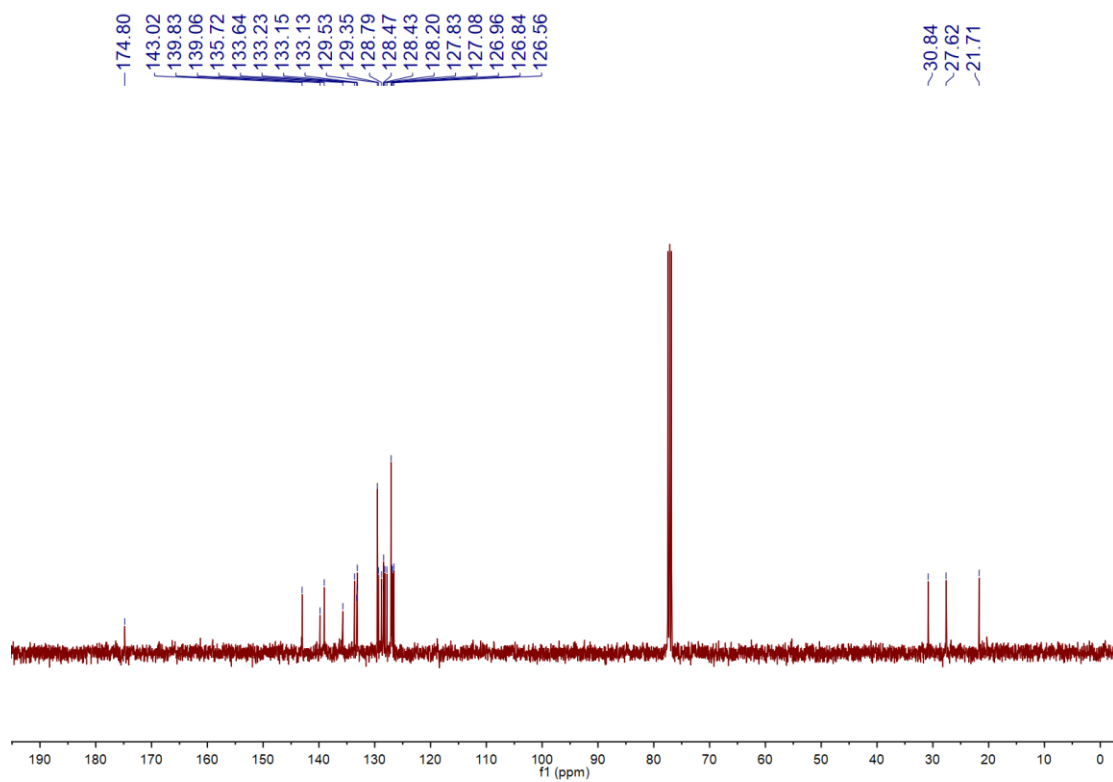

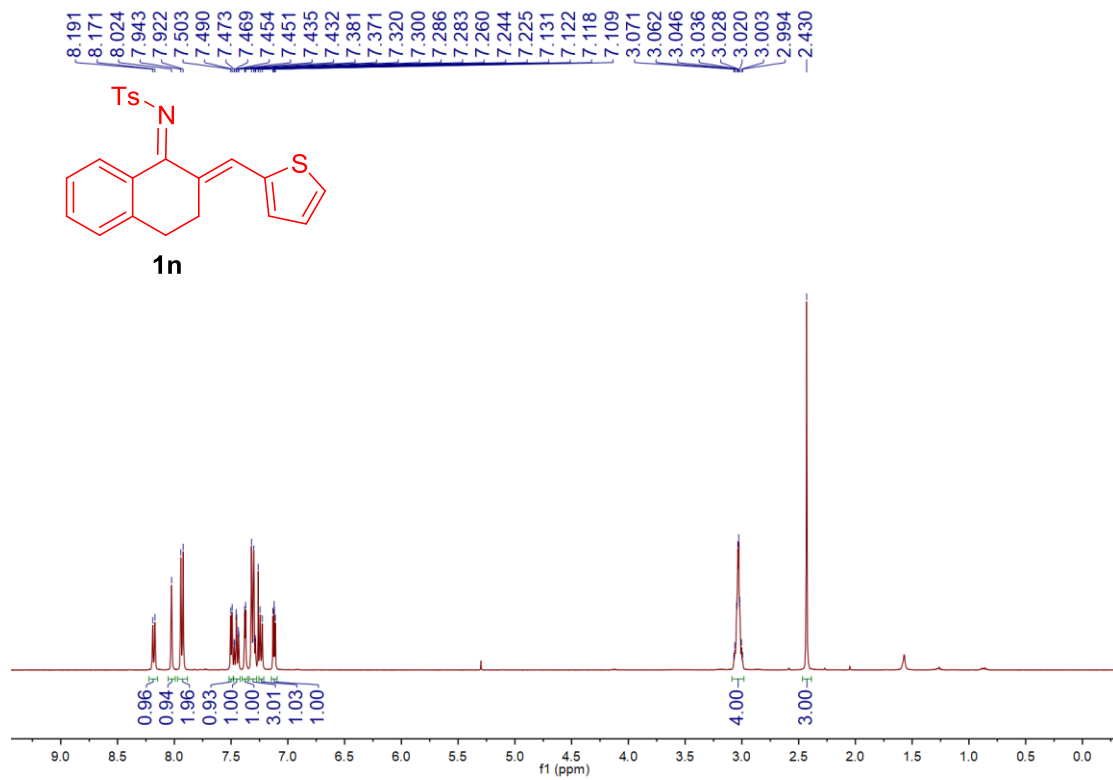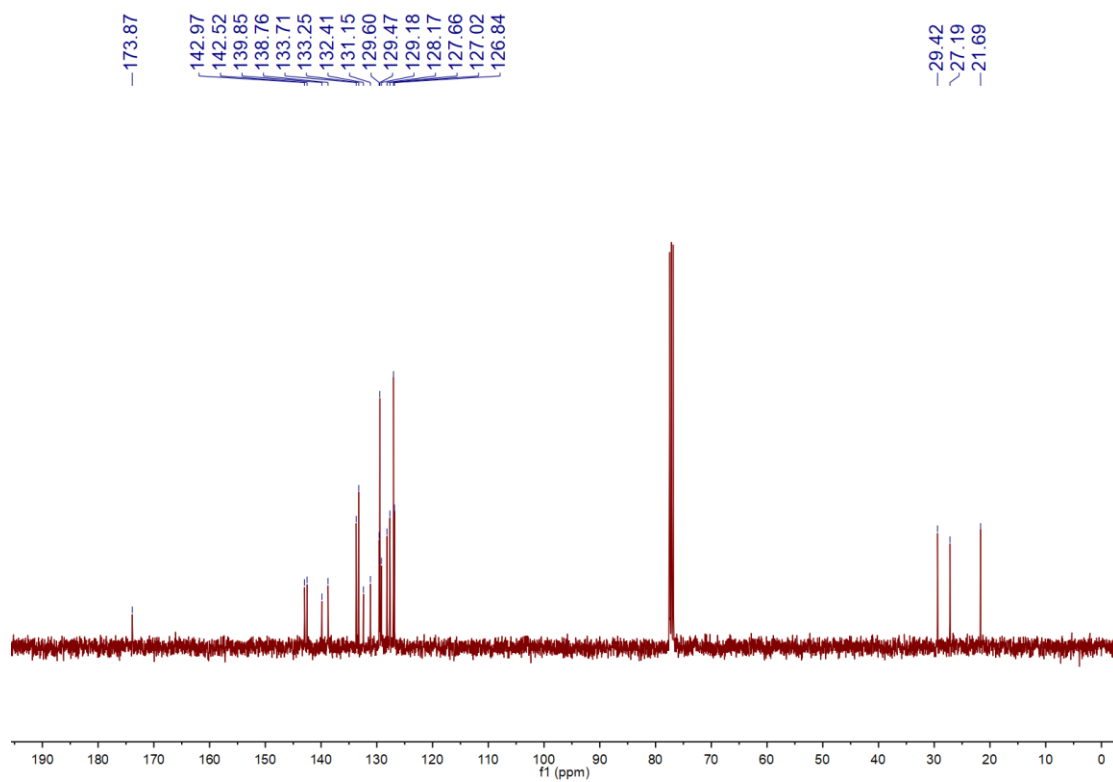

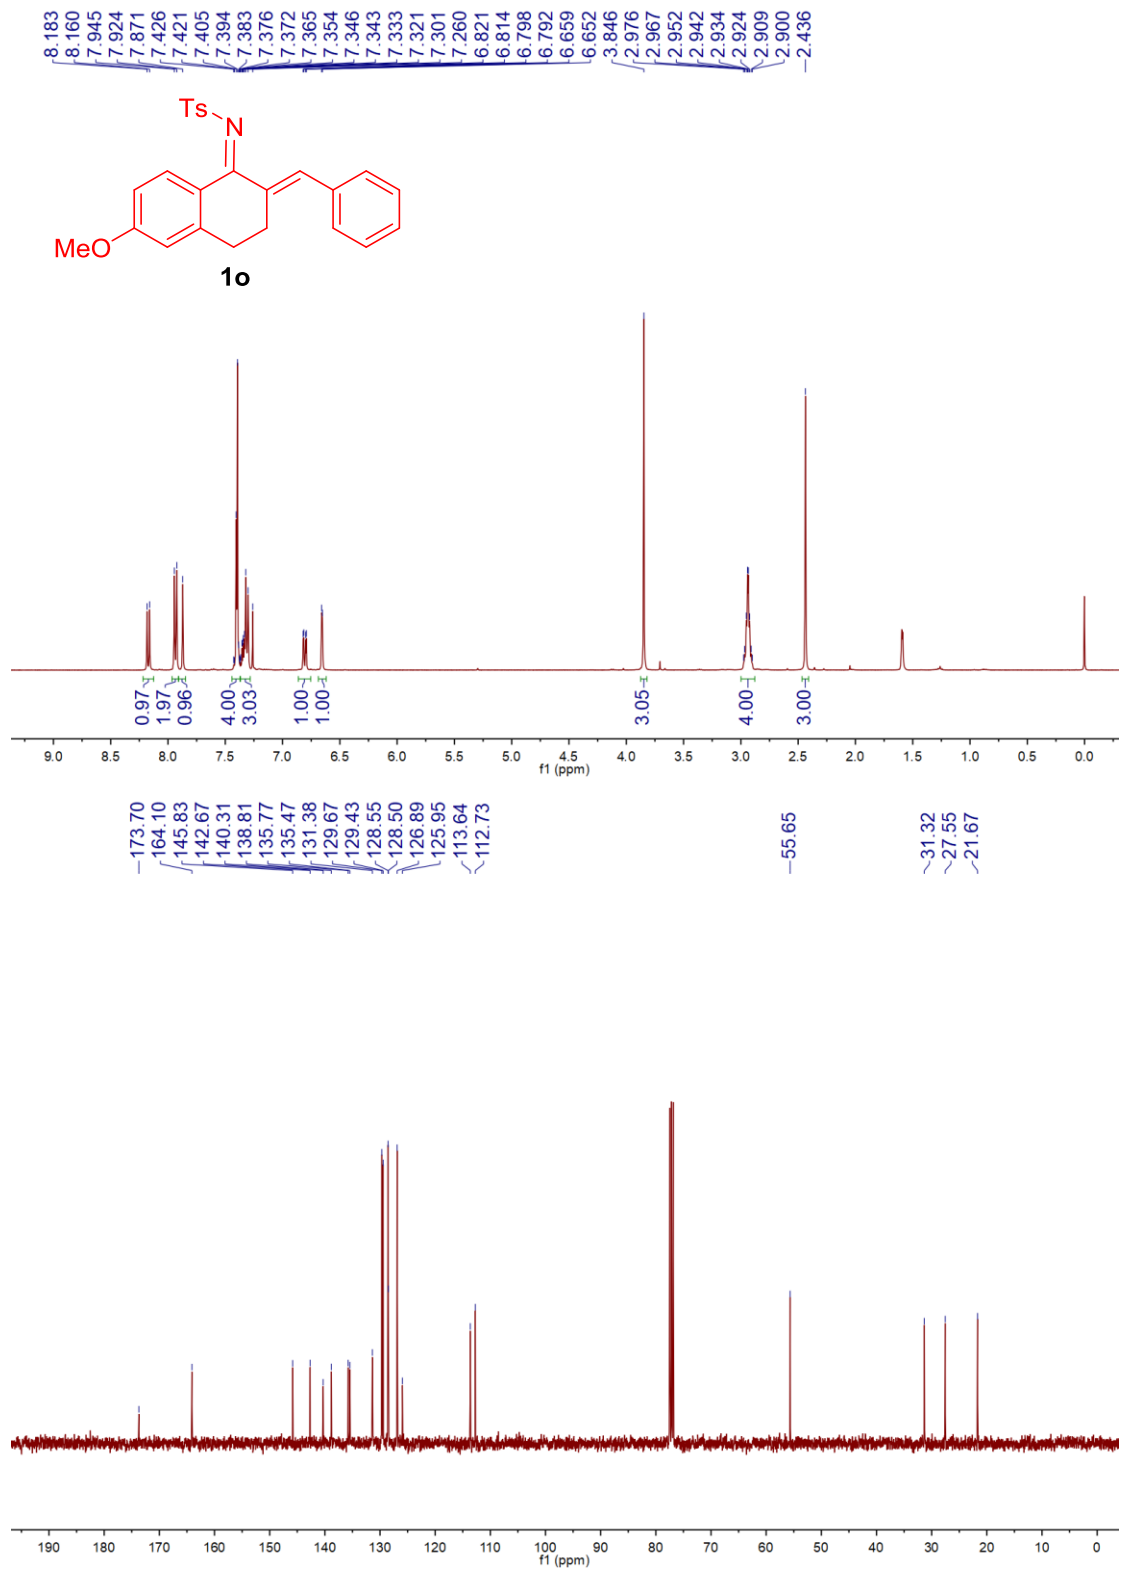

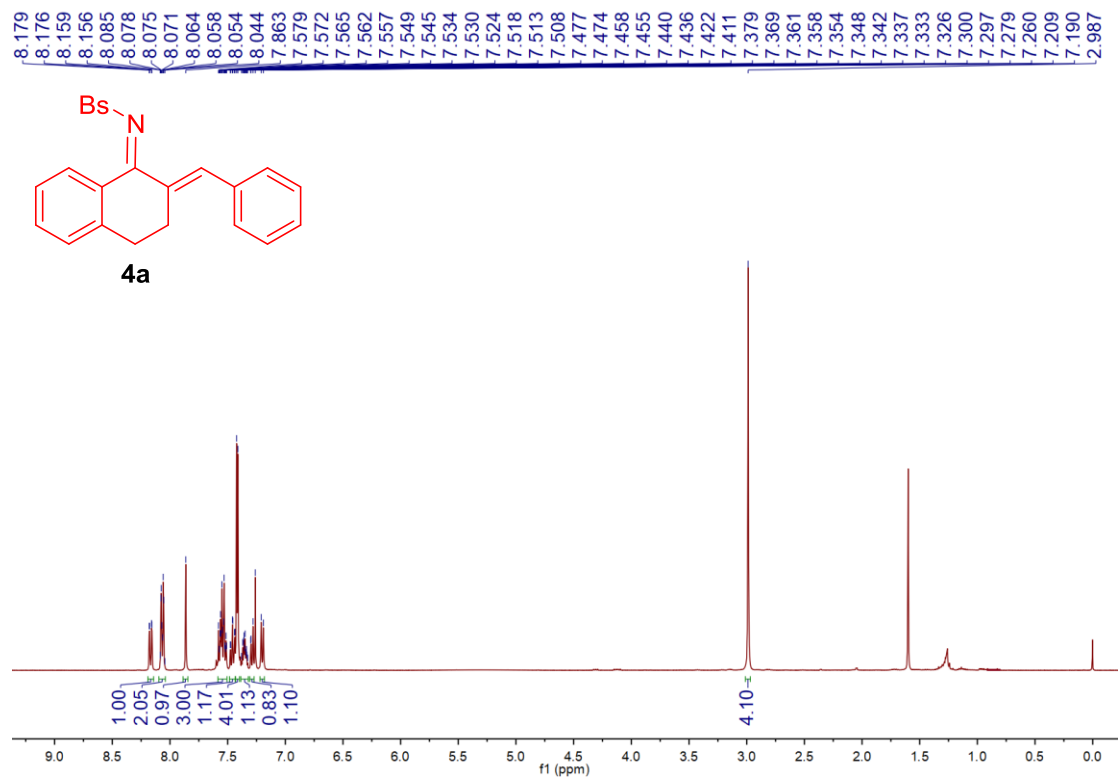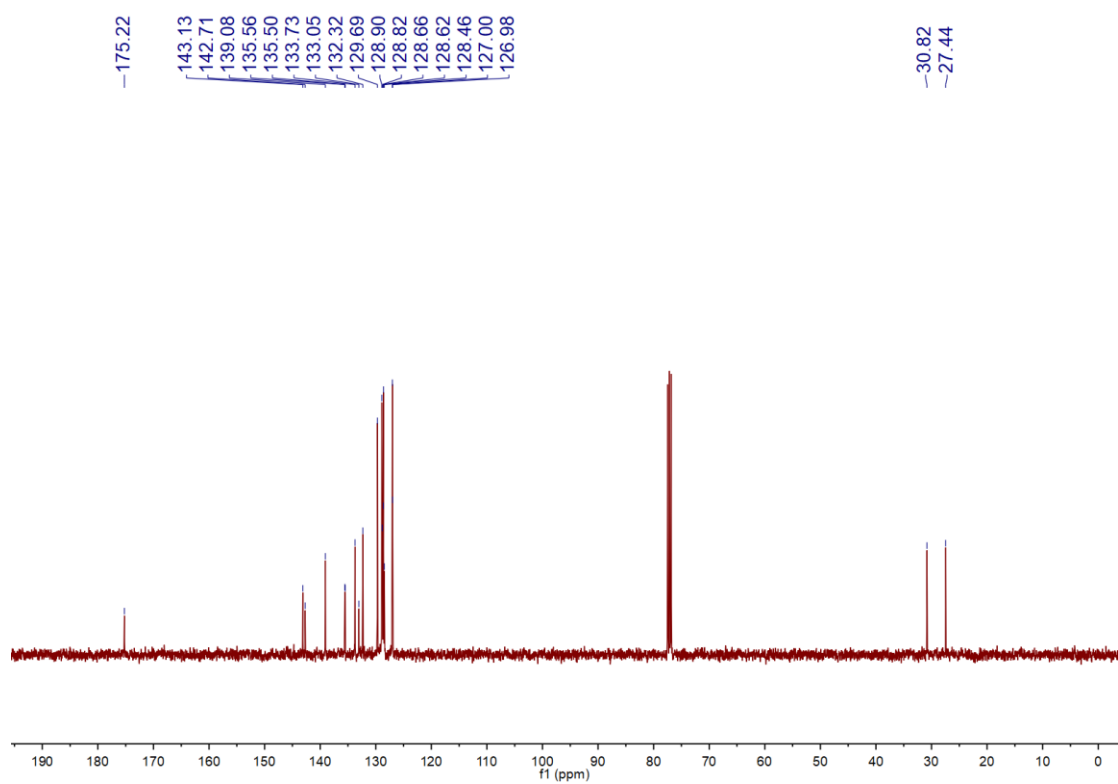

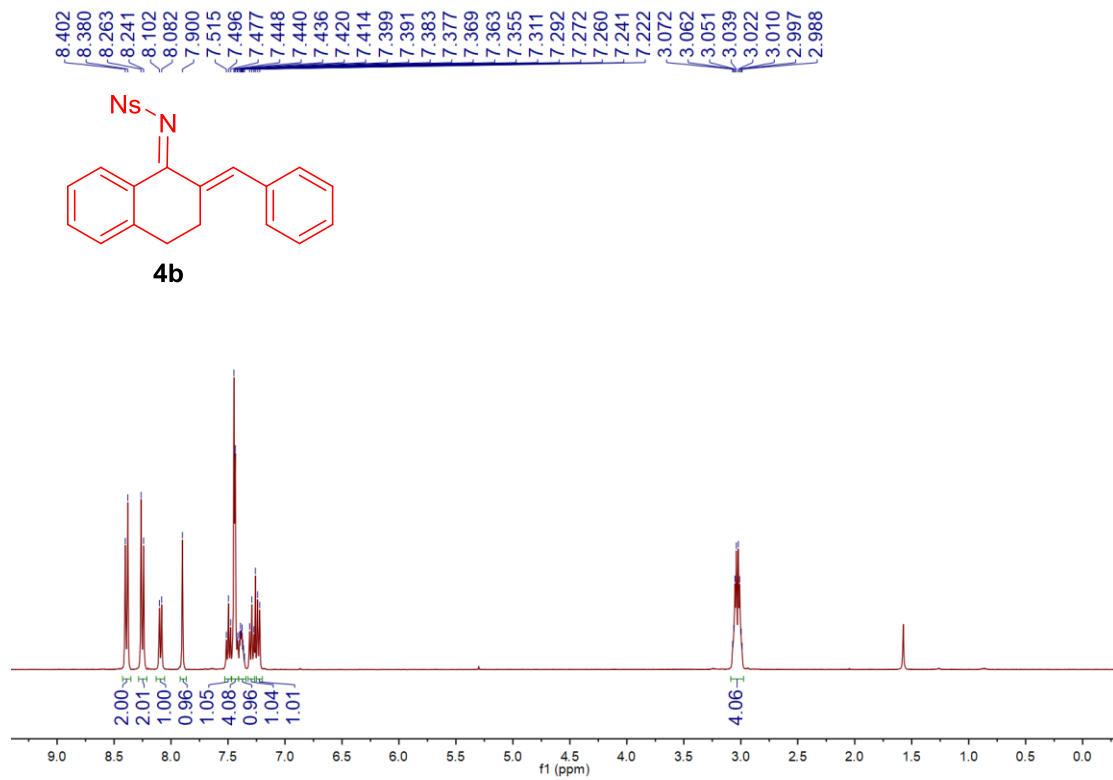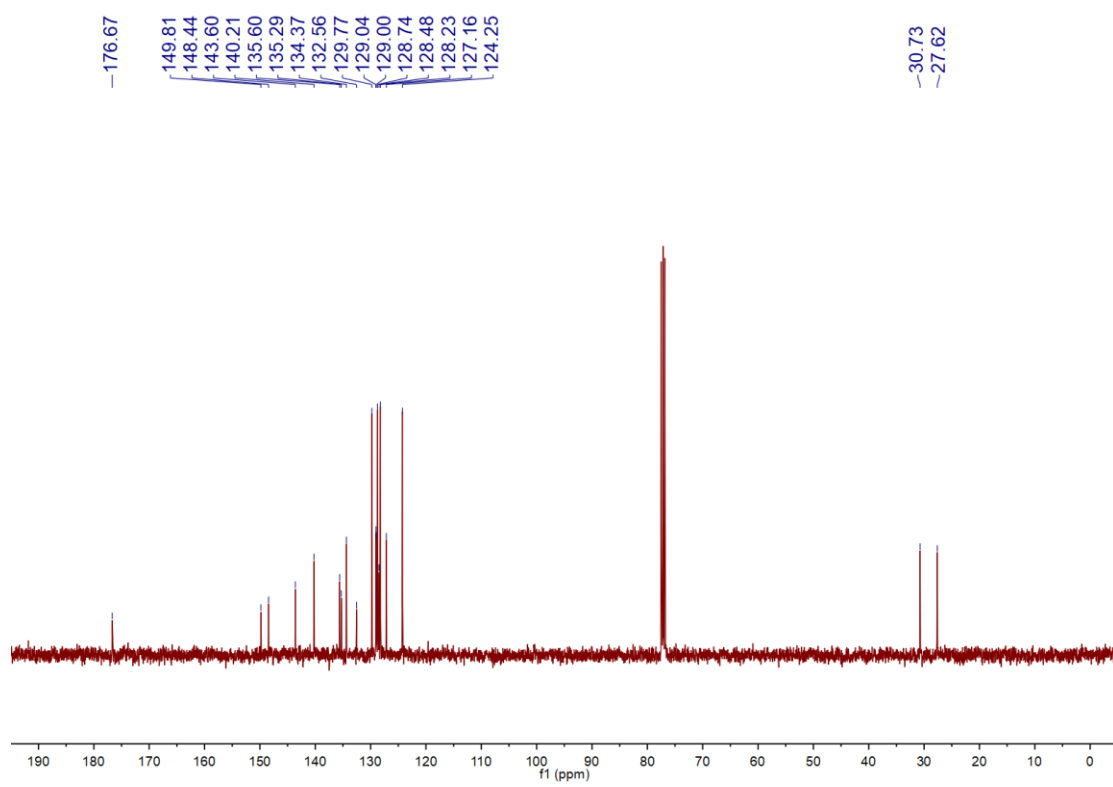

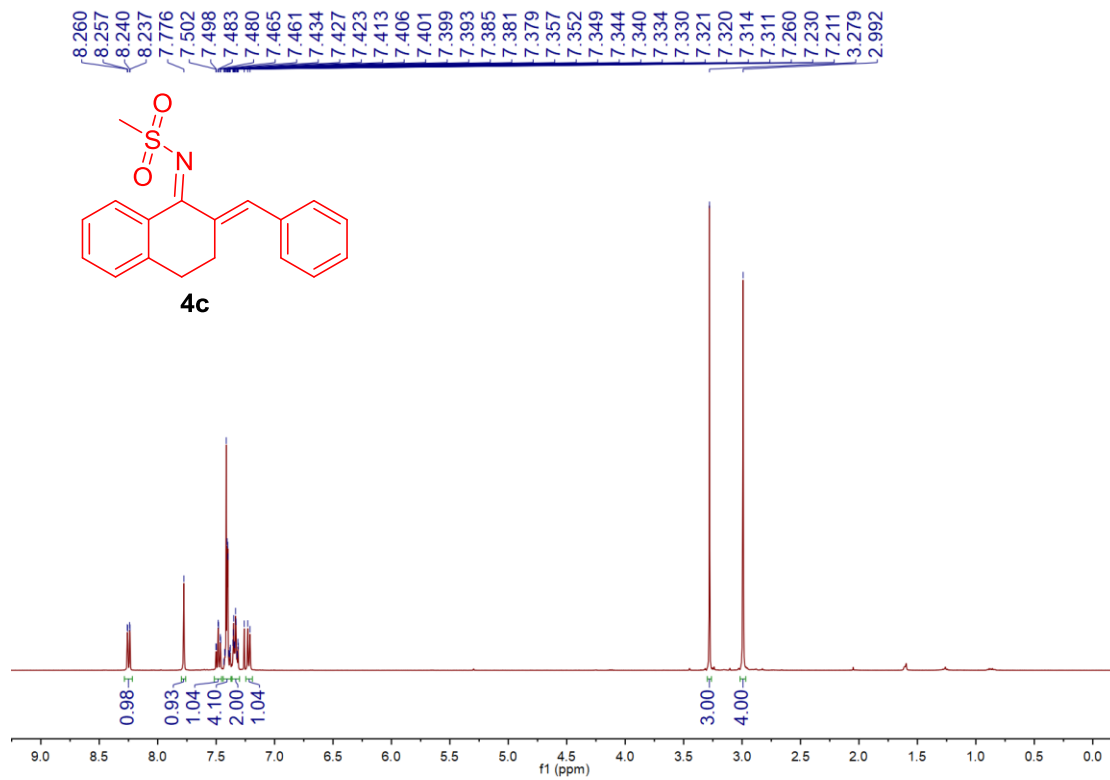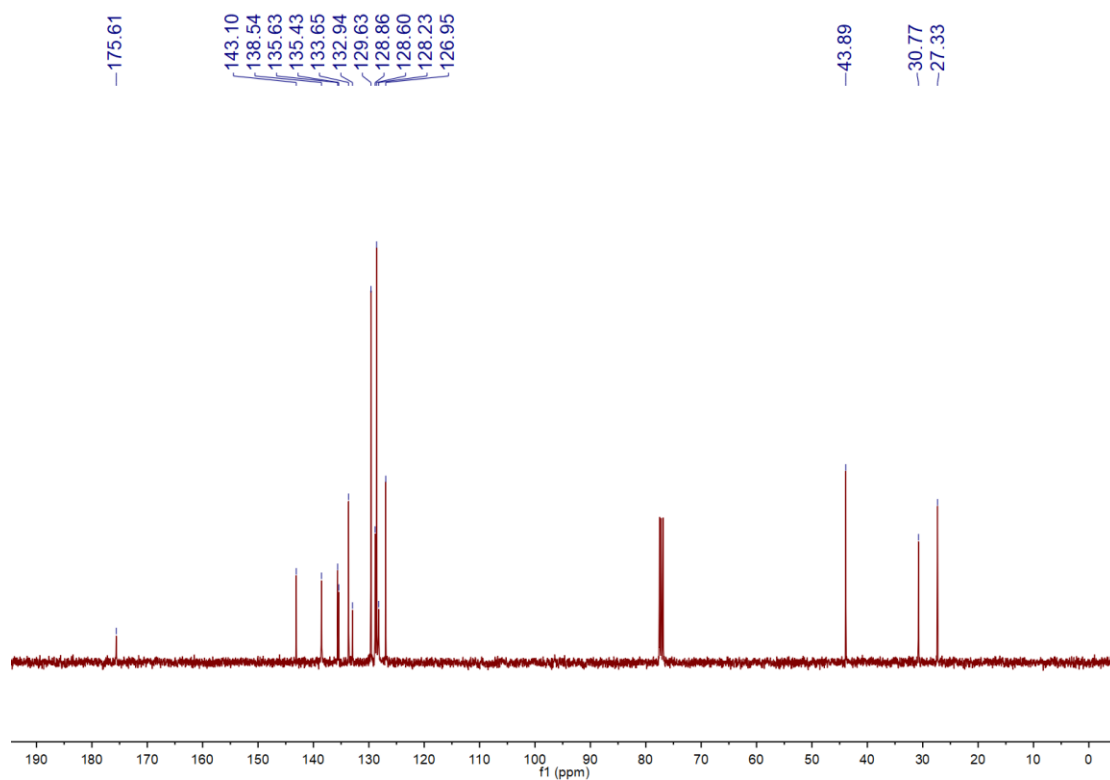

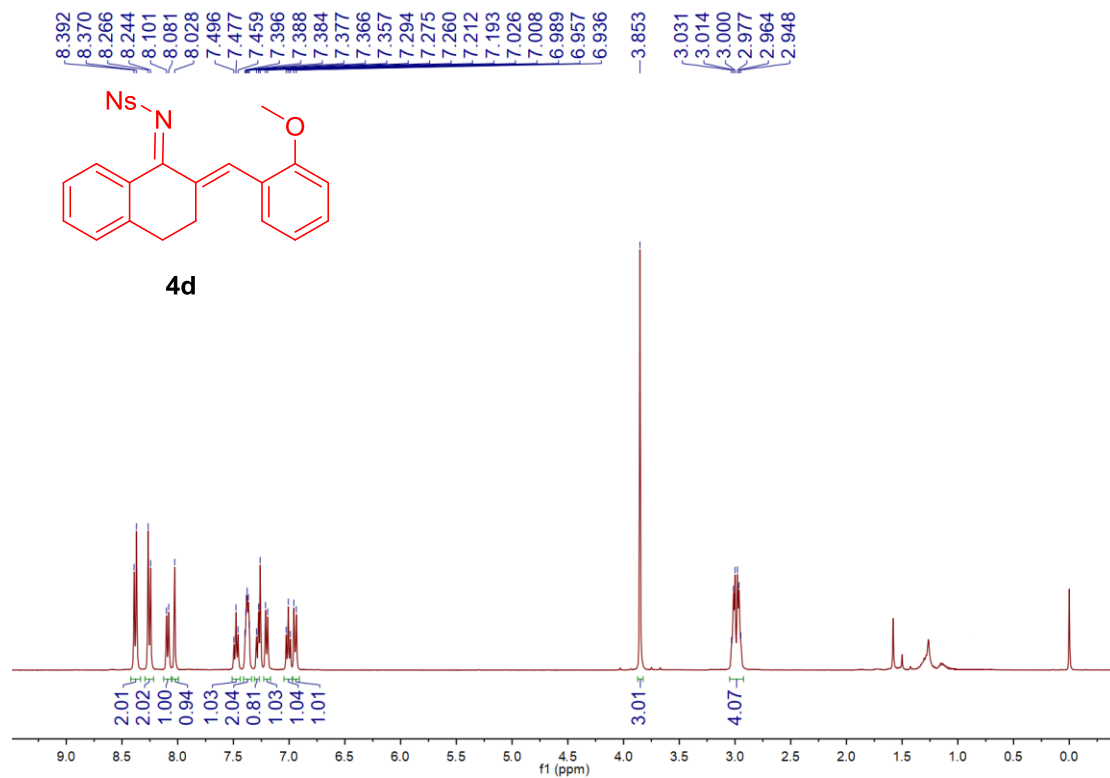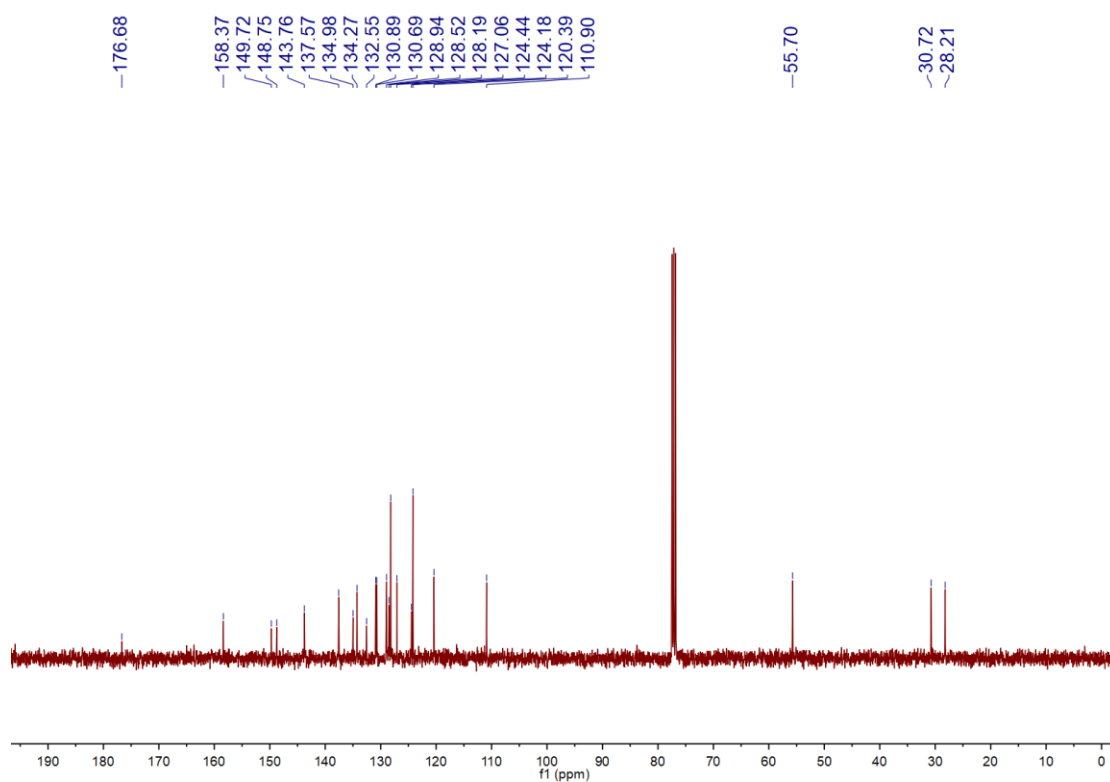



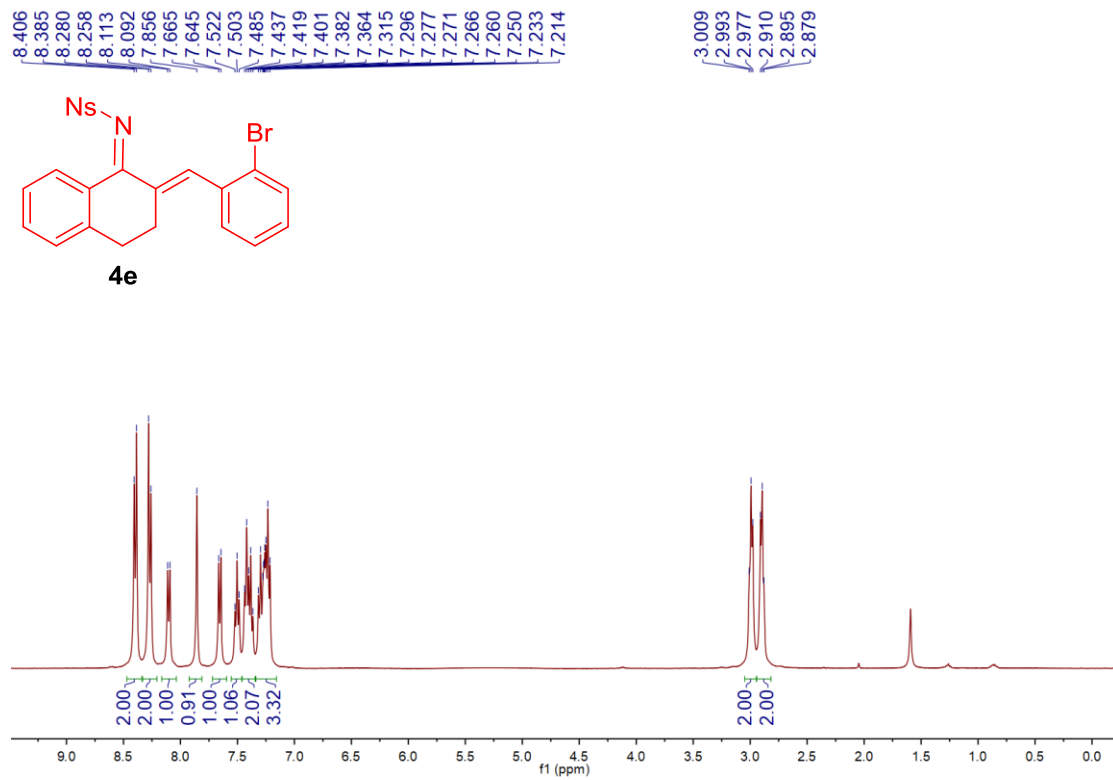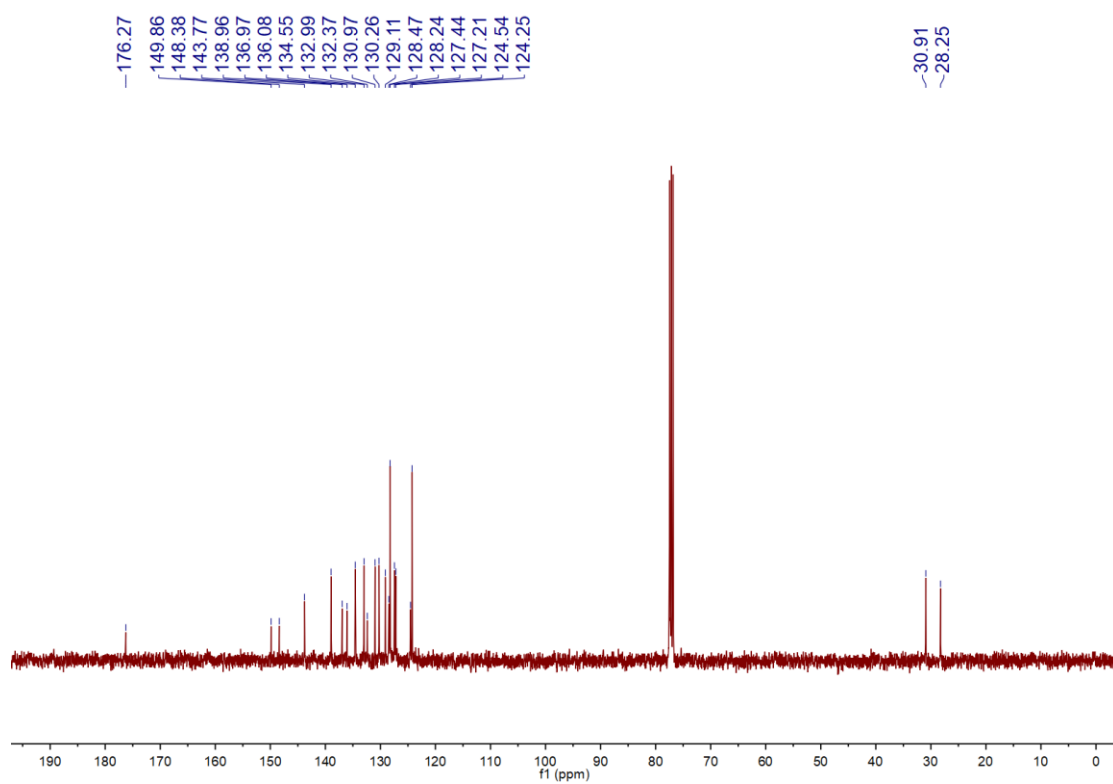

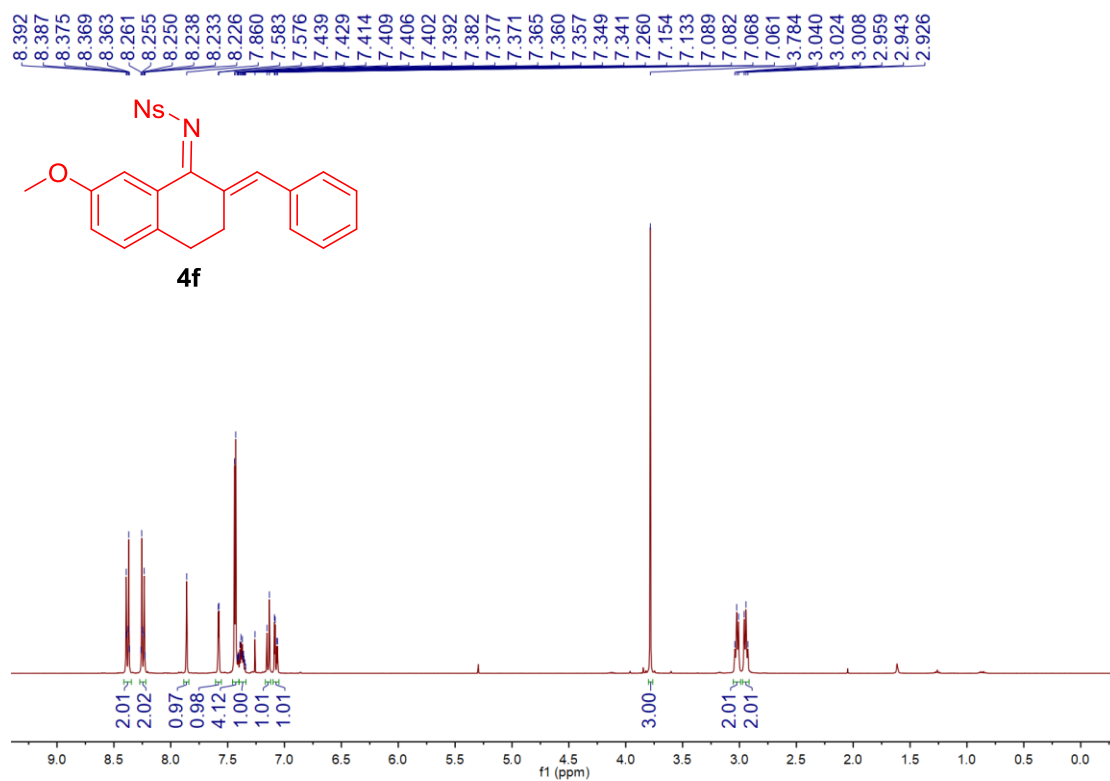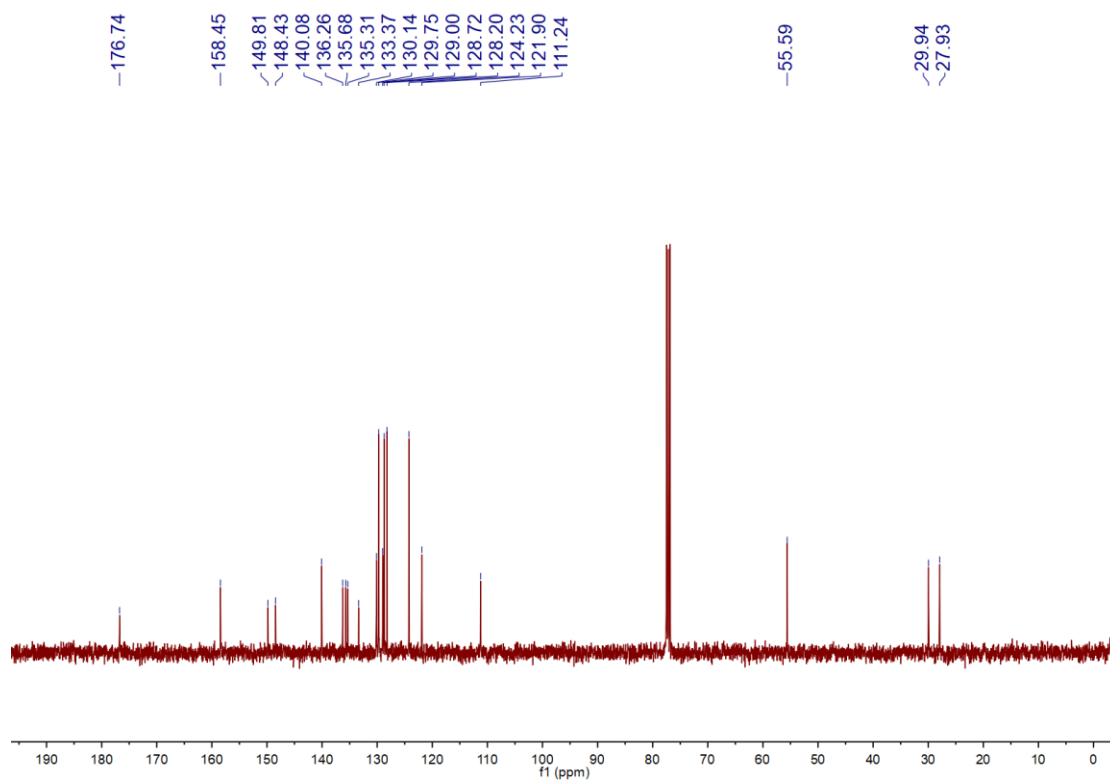

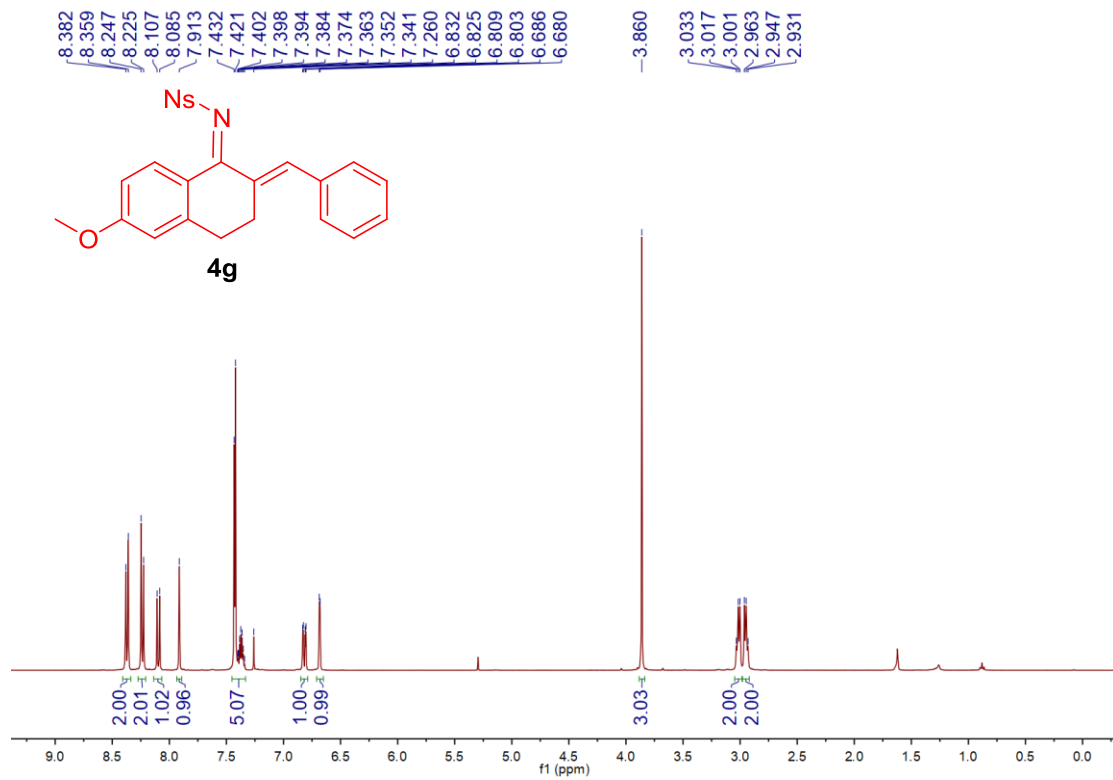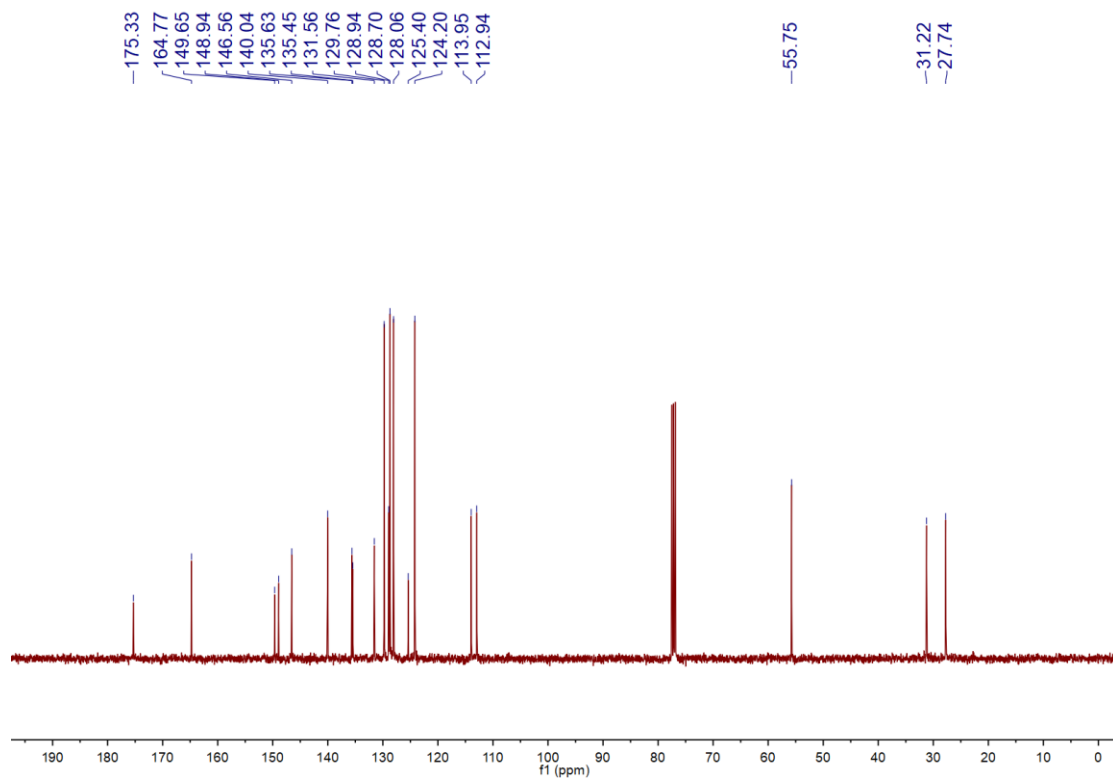

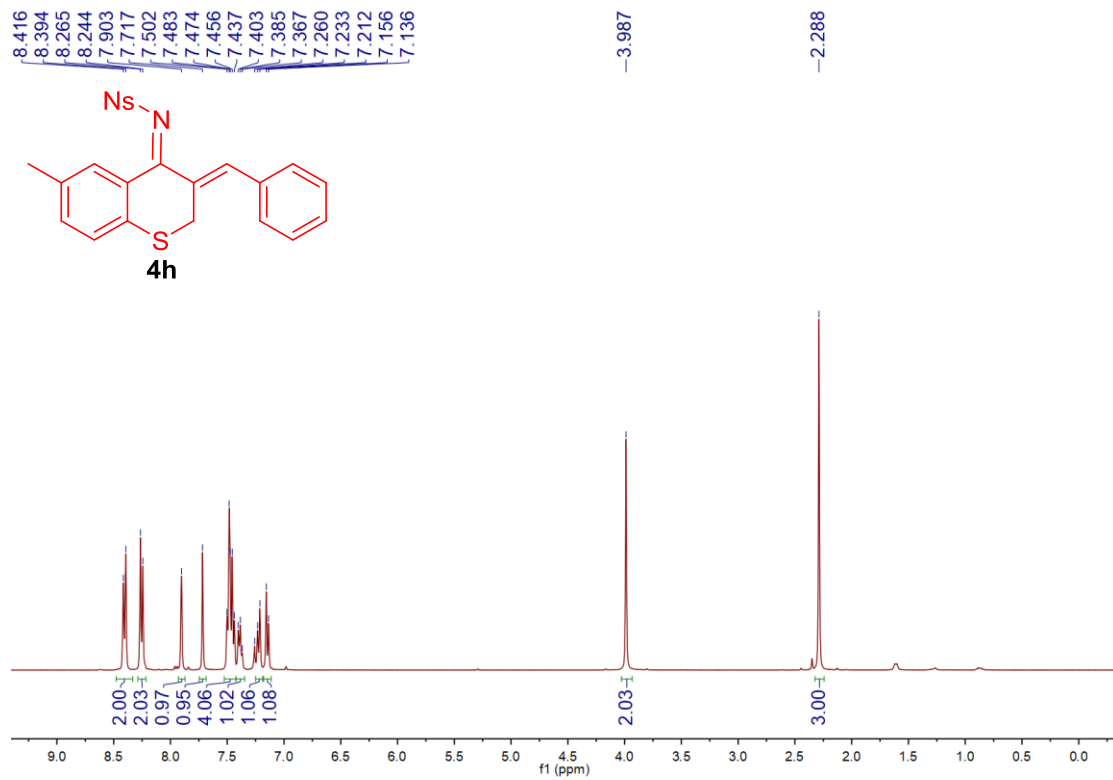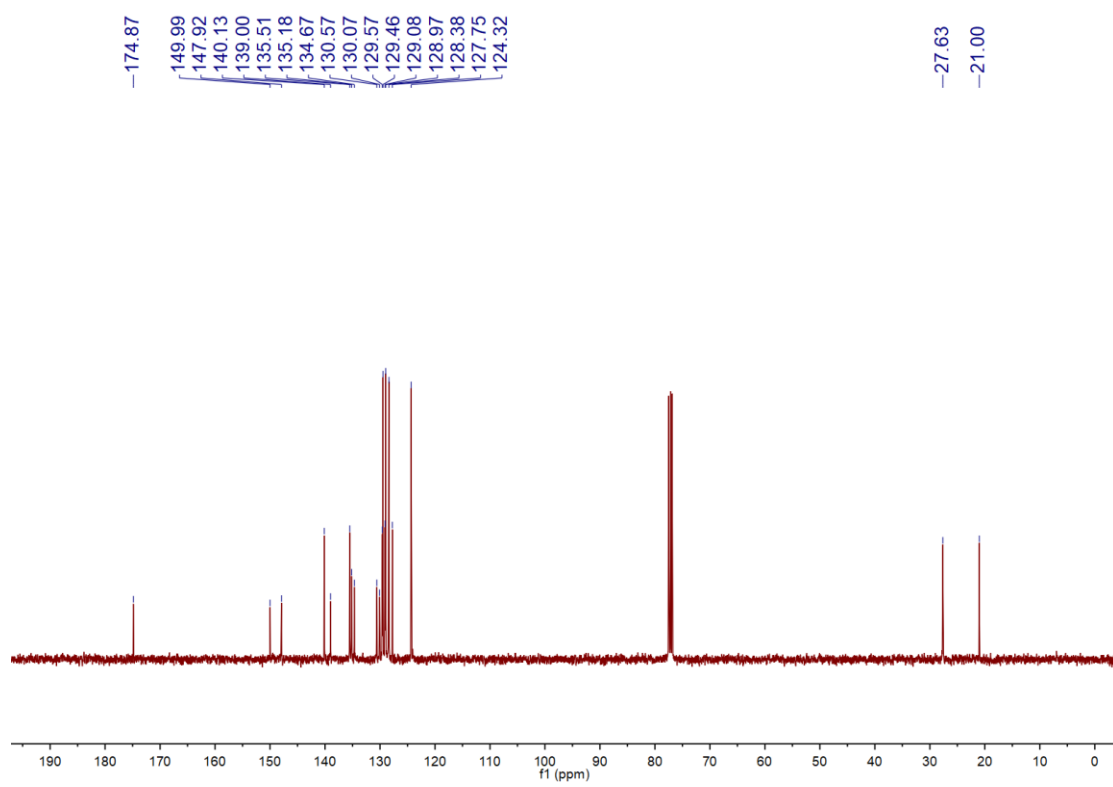

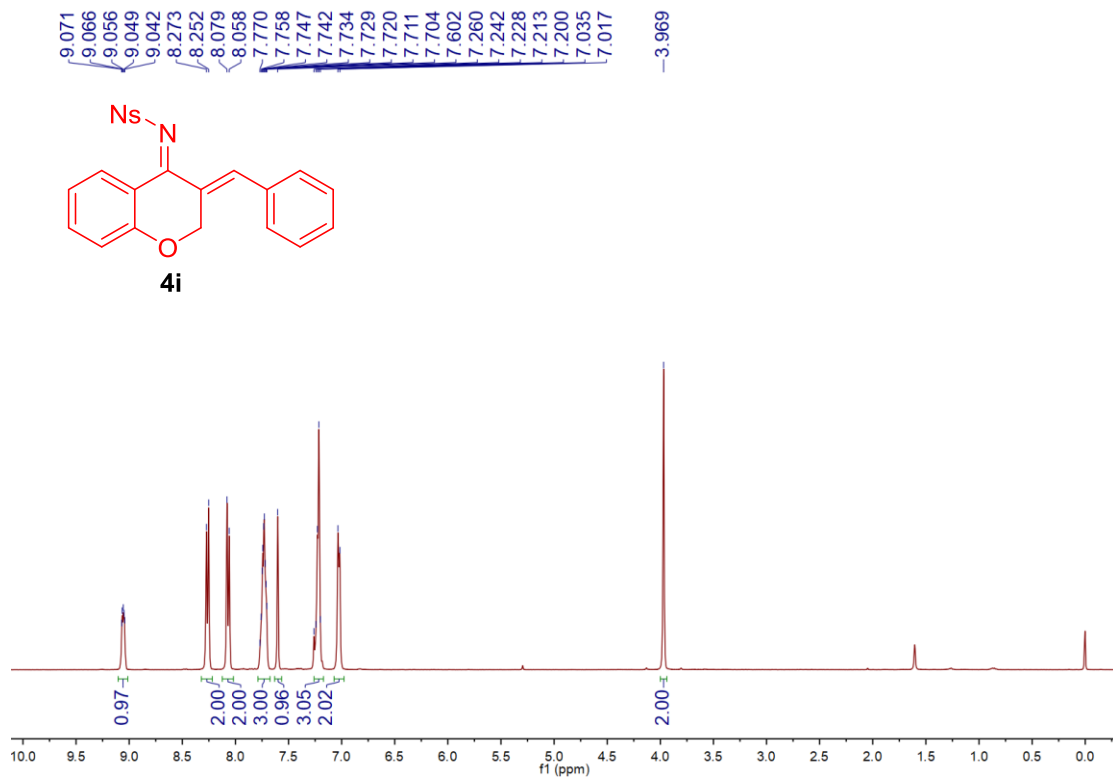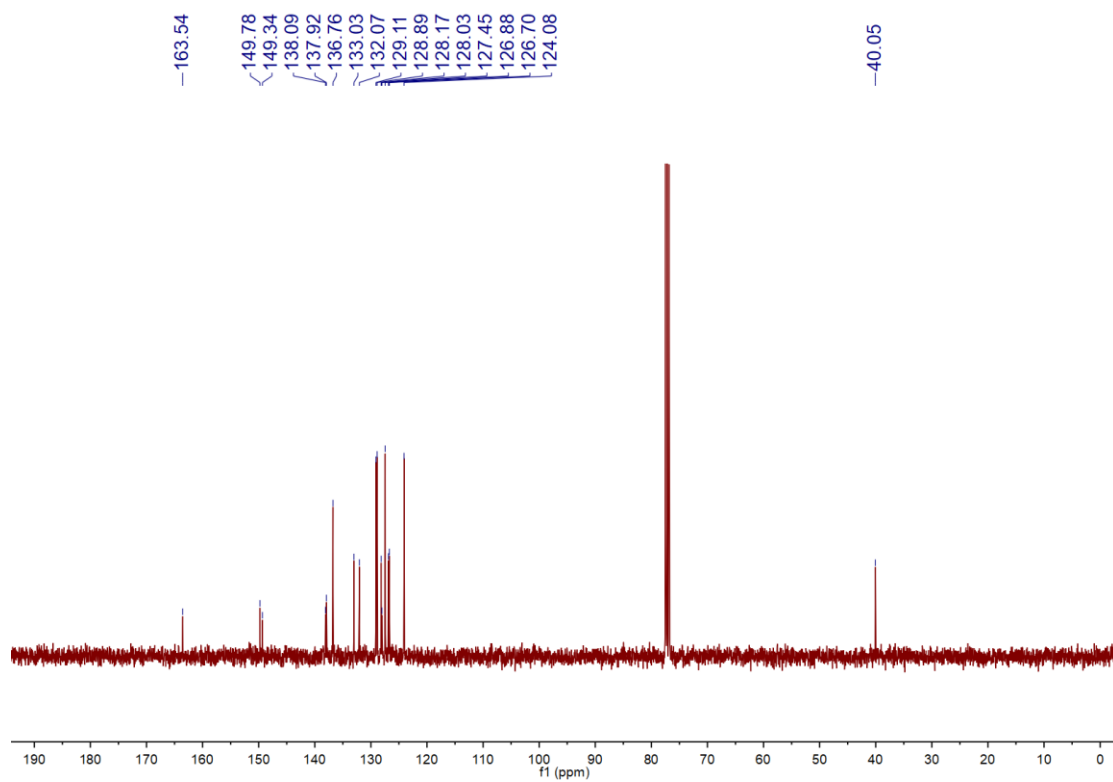

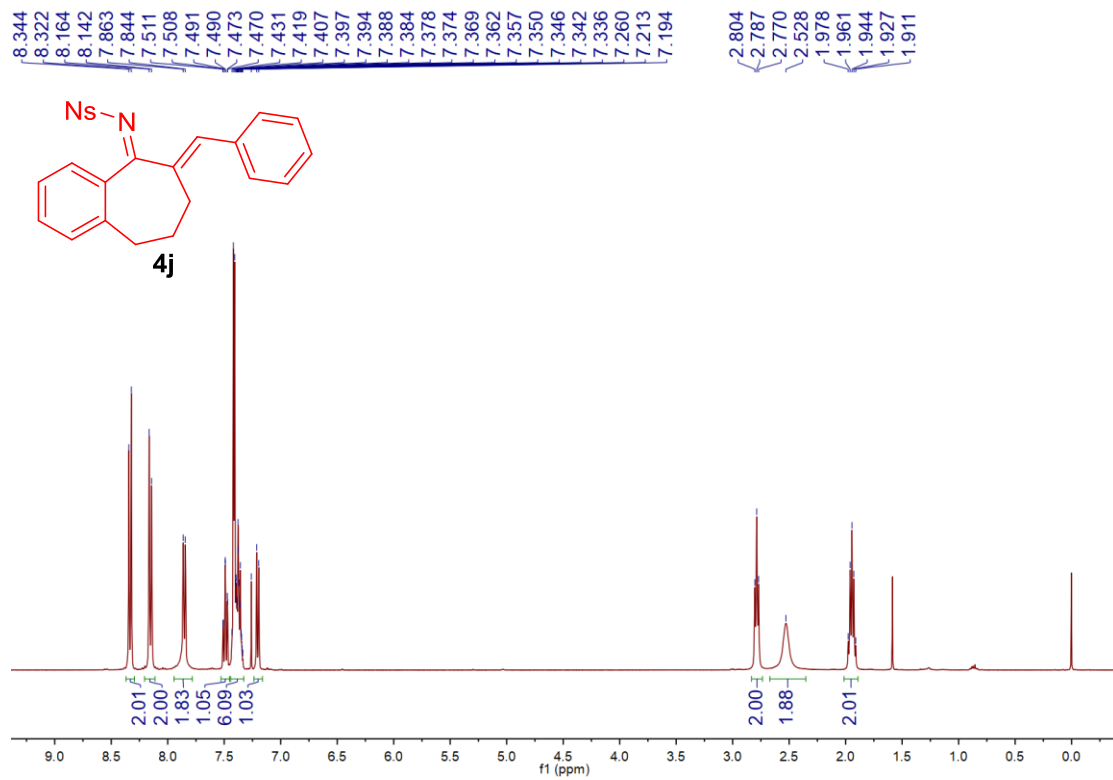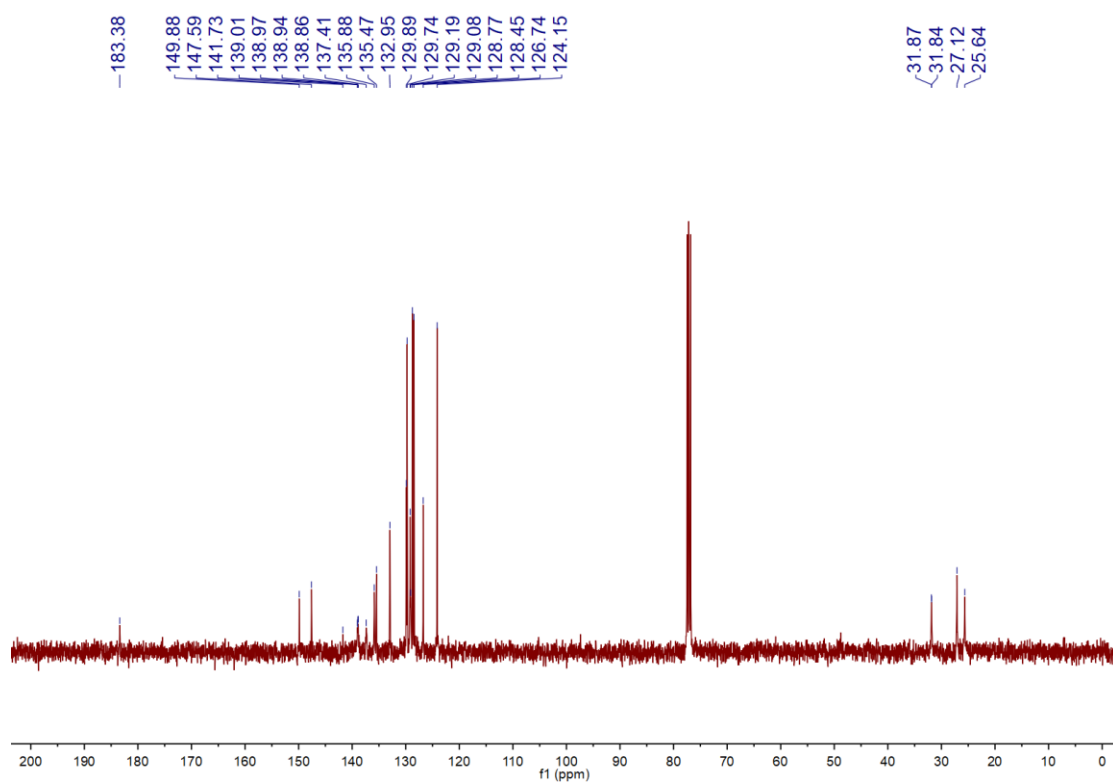

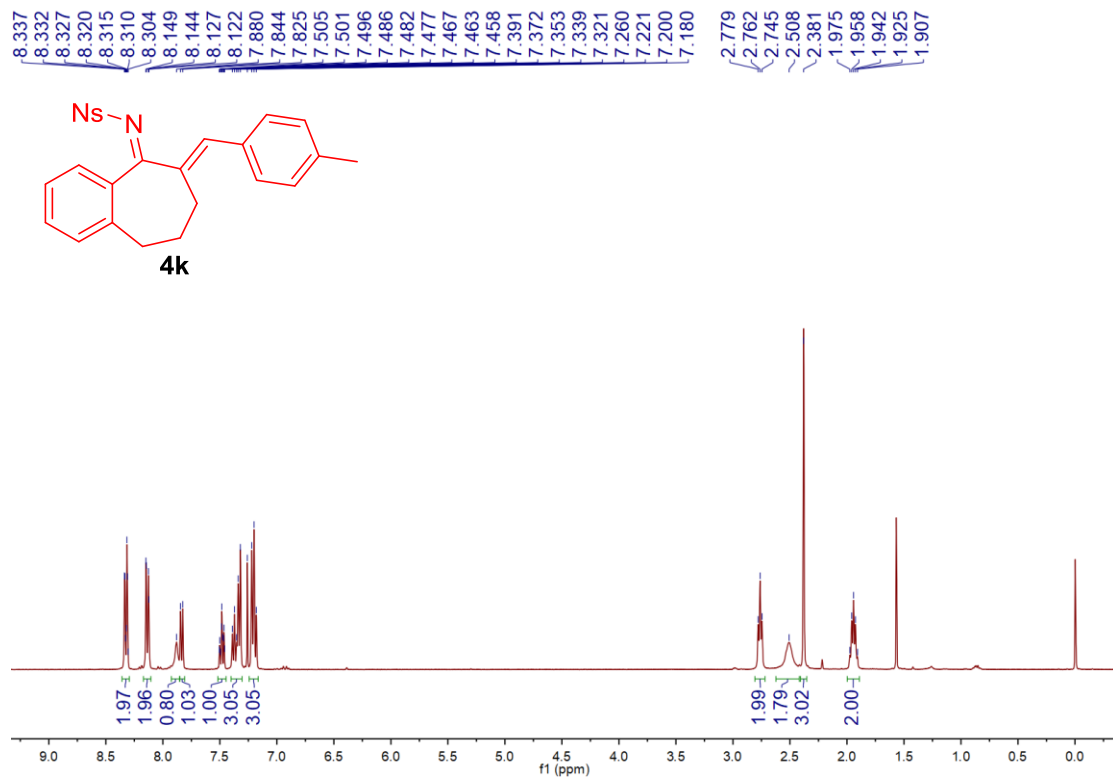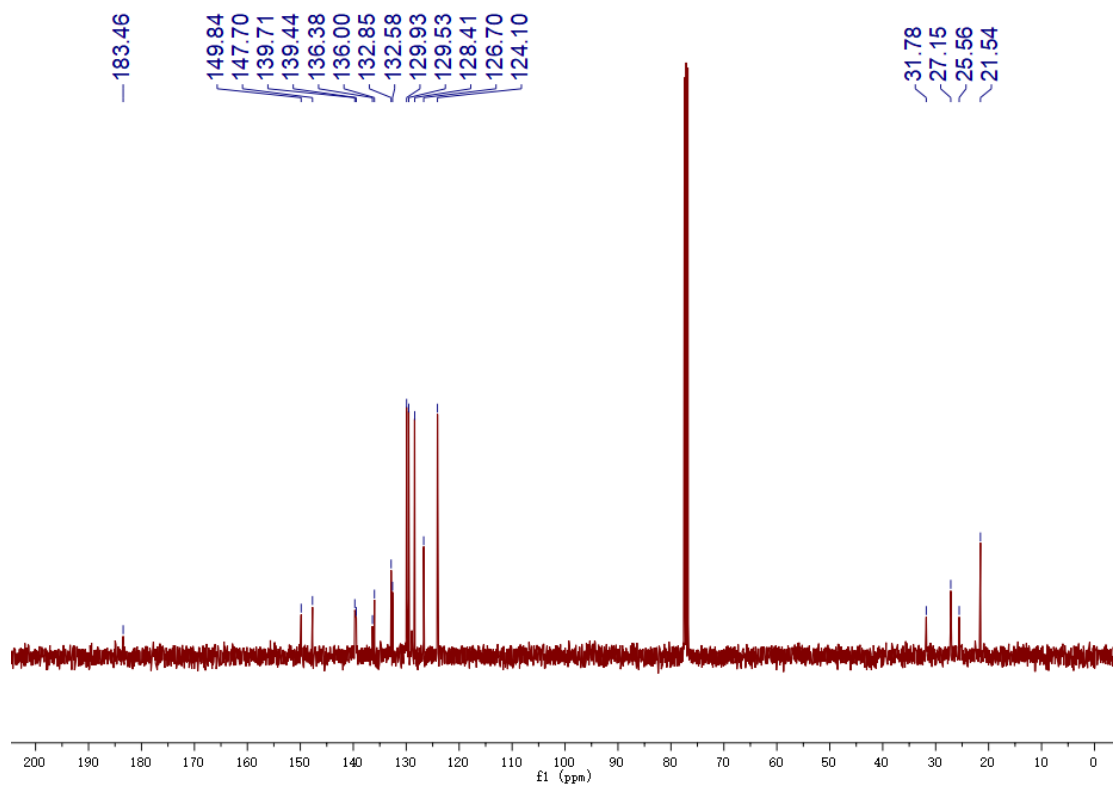

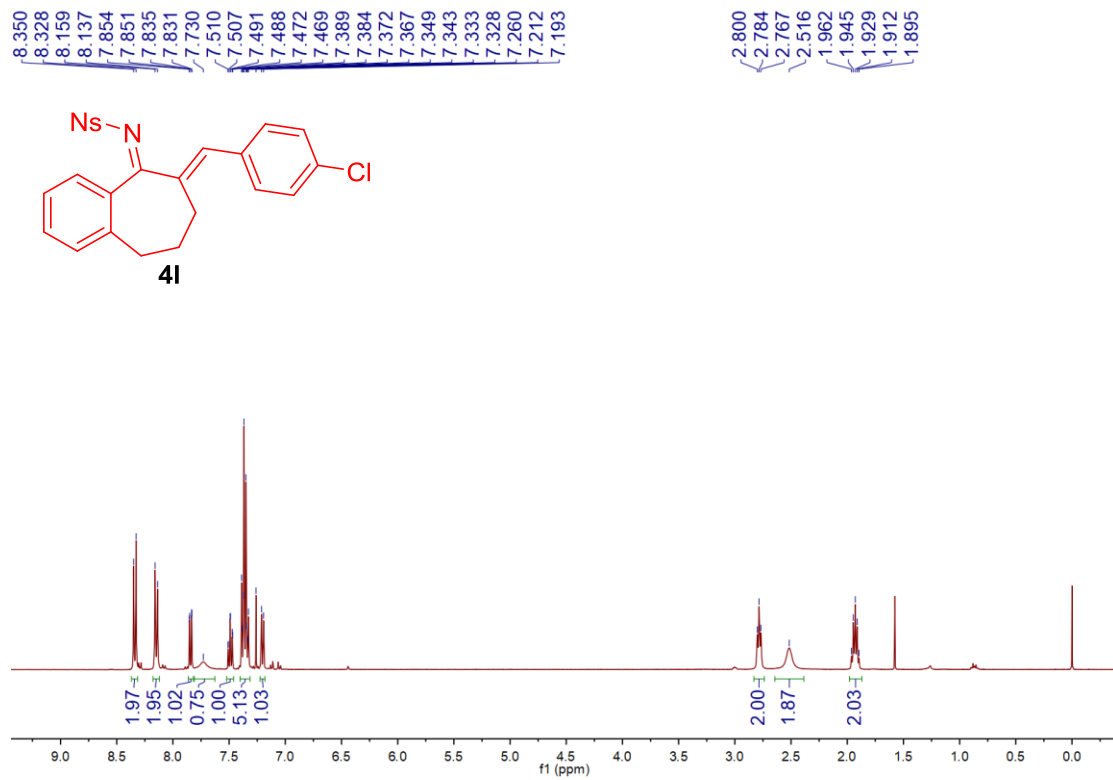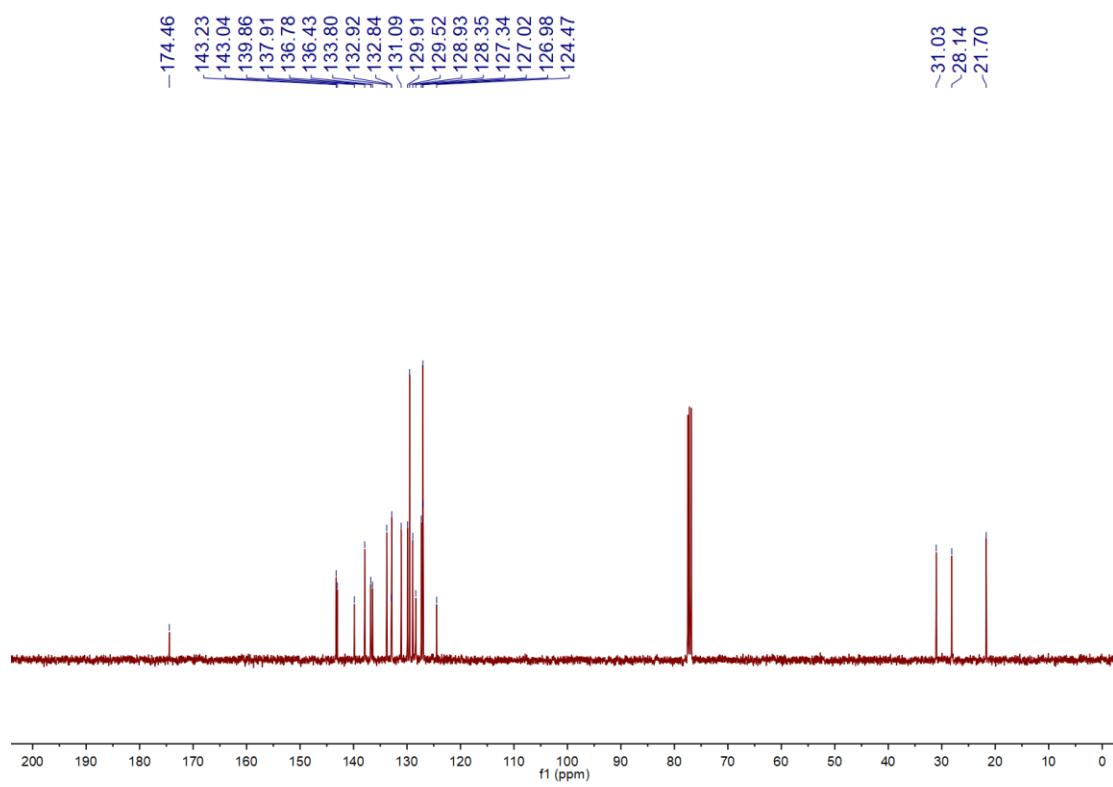



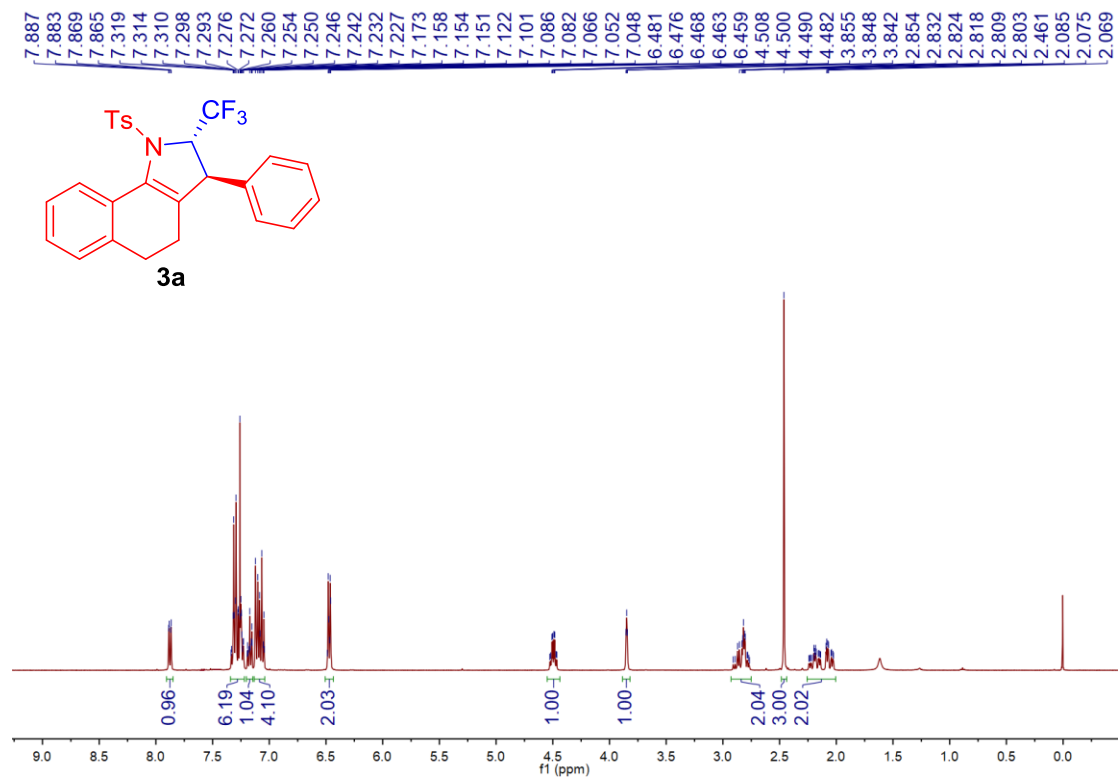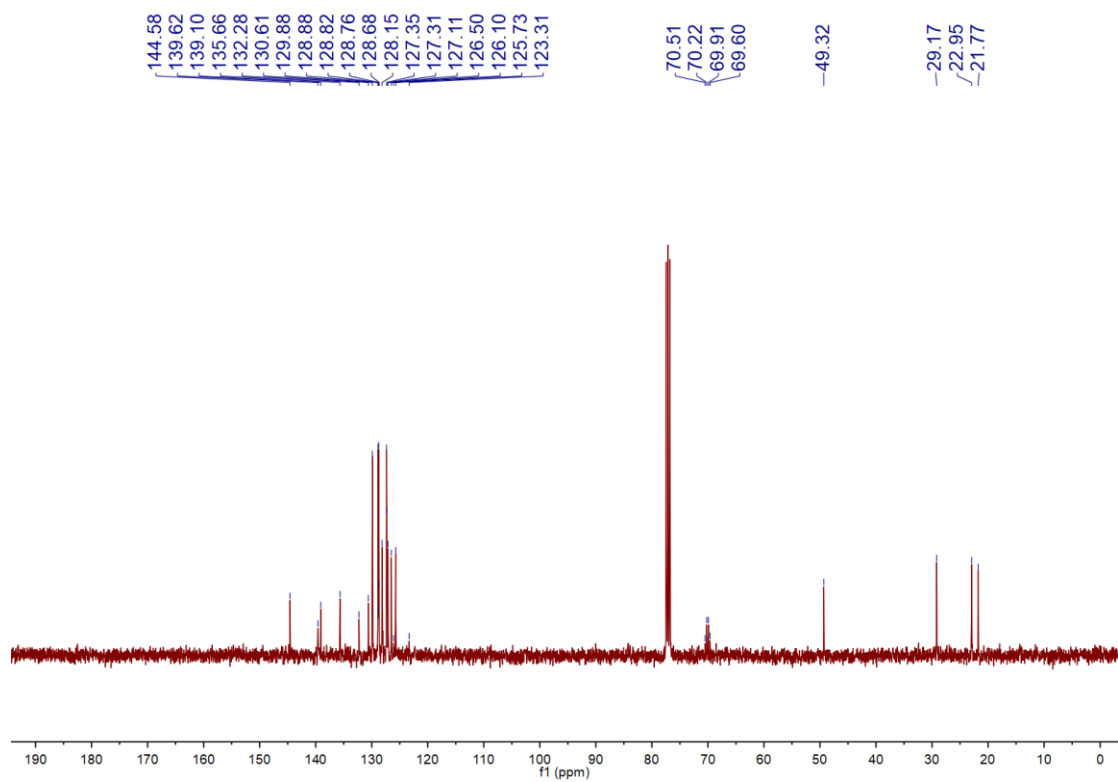

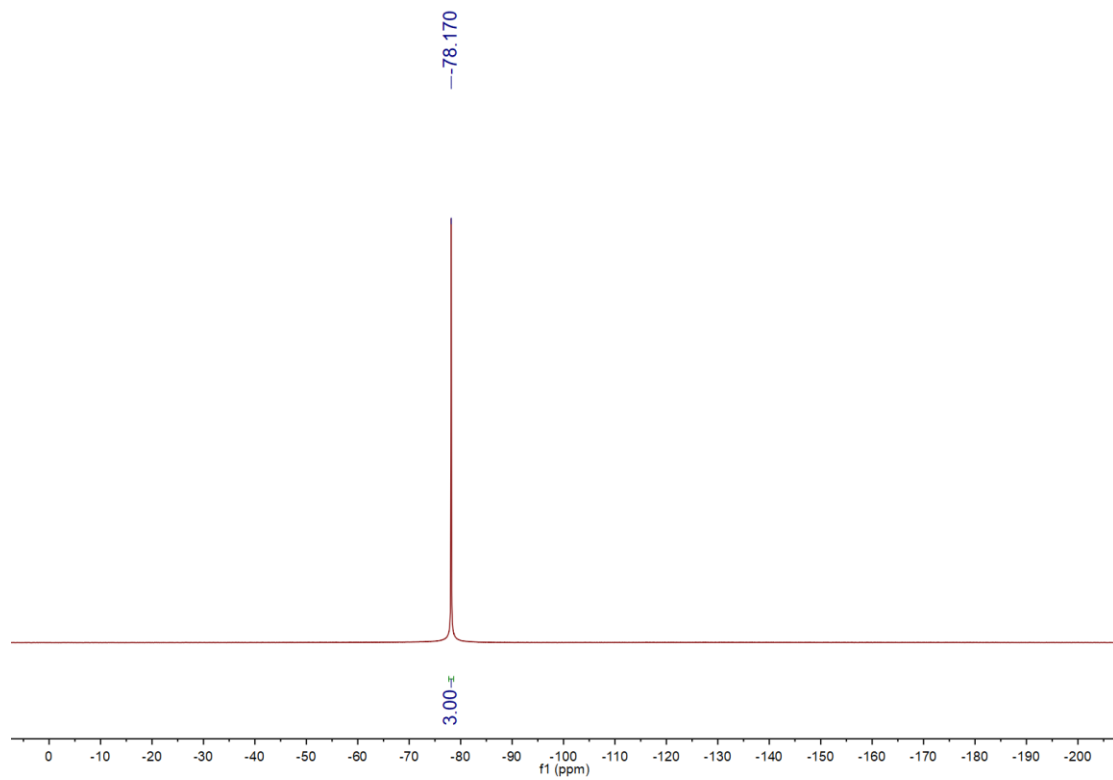

7.857  
7.853  
7.840  
7.835  
7.839  
7.834  
7.830  
7.826  
7.823  
7.818  
7.813  
7.808  
7.296  
7.291  
7.279  
7.275  
7.260  
7.257  
7.250  
7.246  
7.233  
7.161  
7.141  
6.785  
6.780  
6.769  
6.764  
6.758  
6.747  
6.742  
6.474  
6.469  
6.461  
6.453  
6.445  
6.440  
4.470  
4.463  
4.452  
4.444  
3.834  
3.828  
3.821  
2.848  
2.833  
2.827  
2.817  
2.810  
2.473  
2.052  
2.045

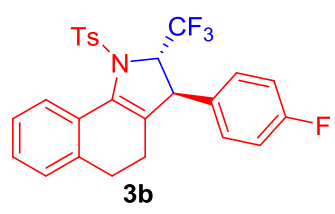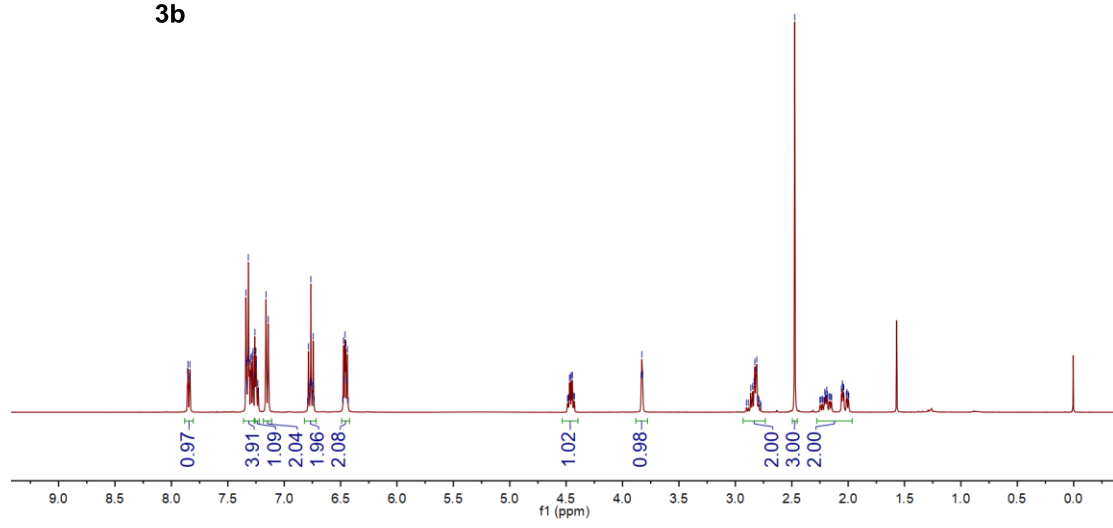

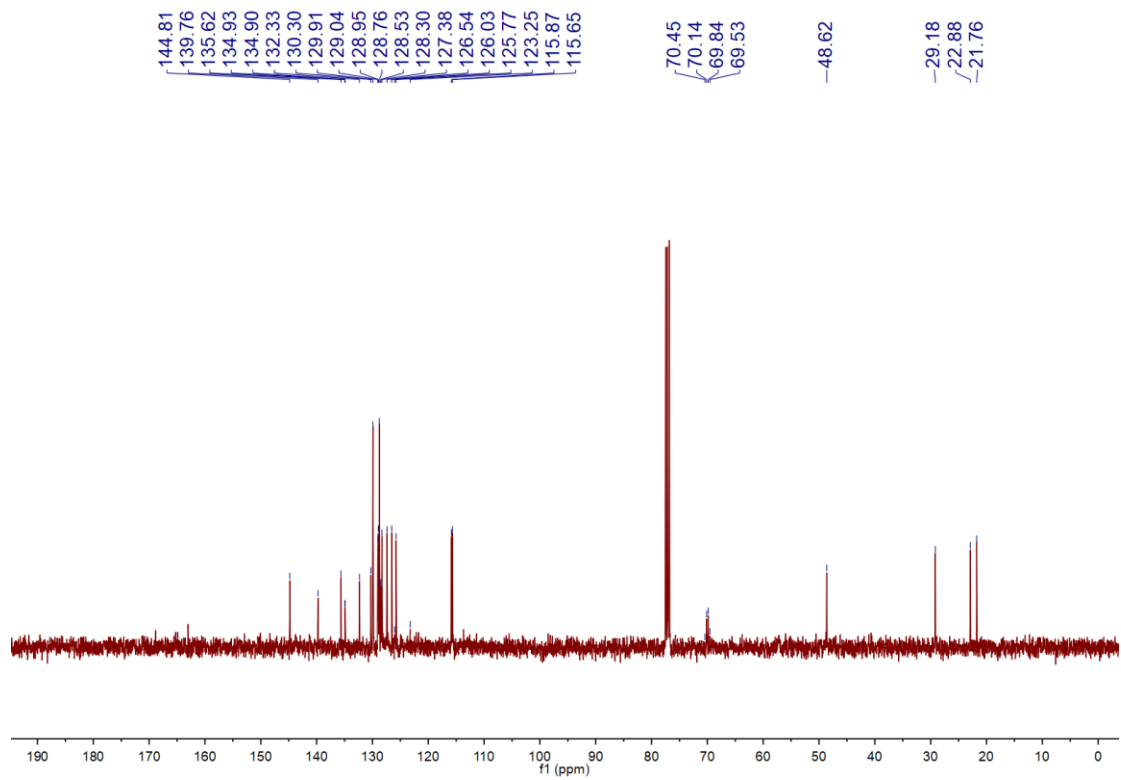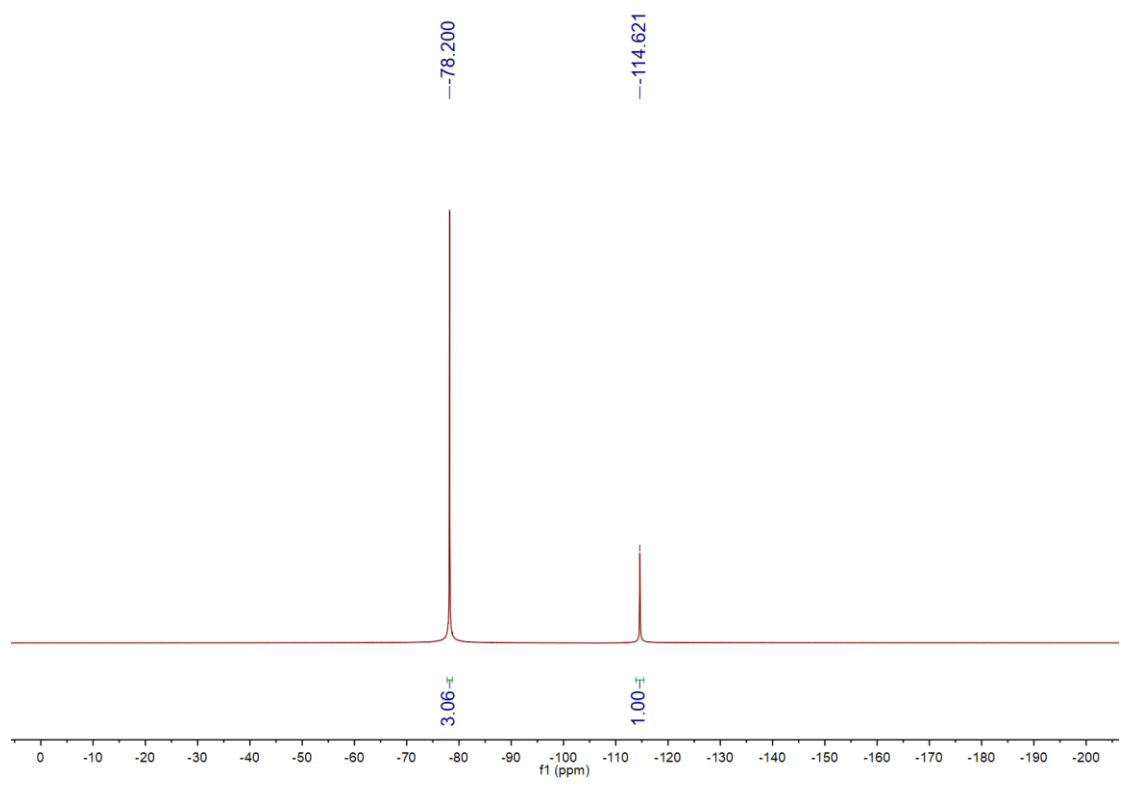

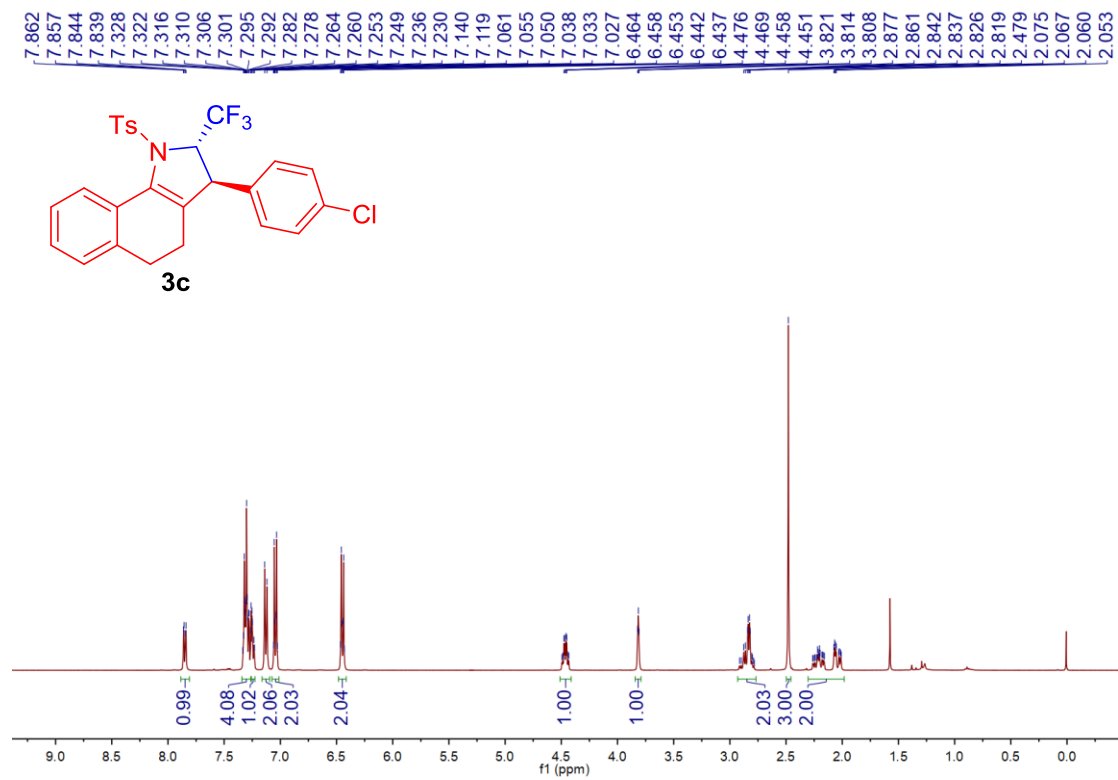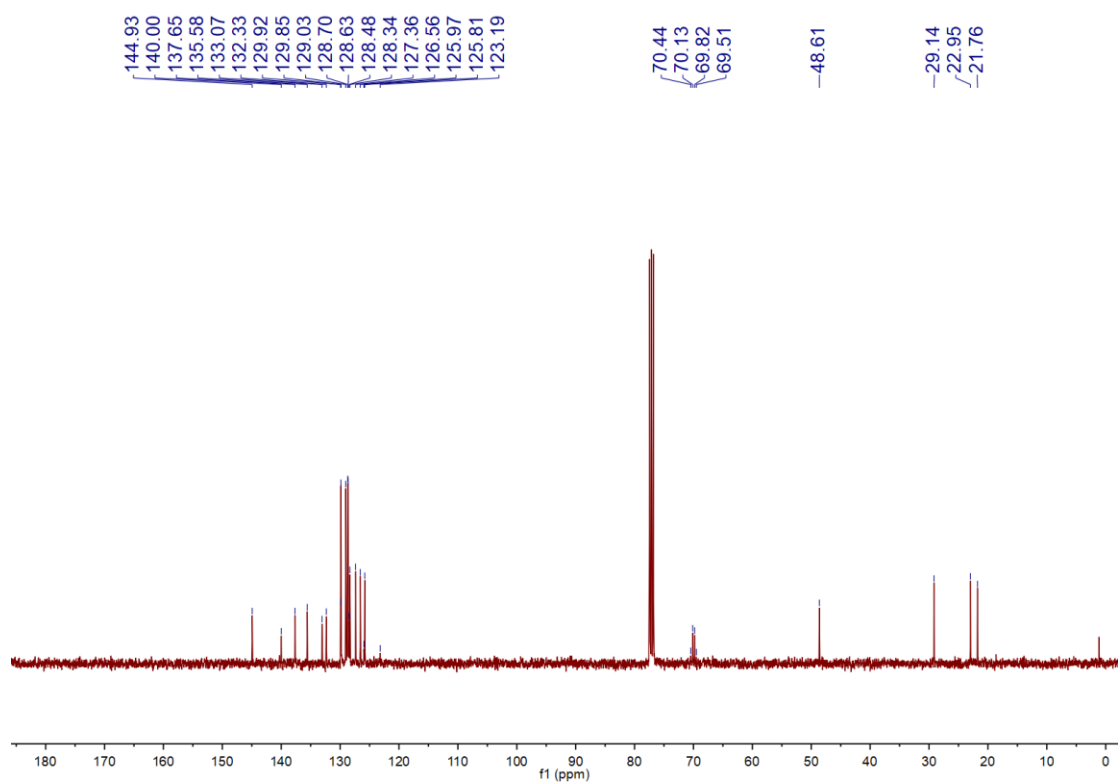

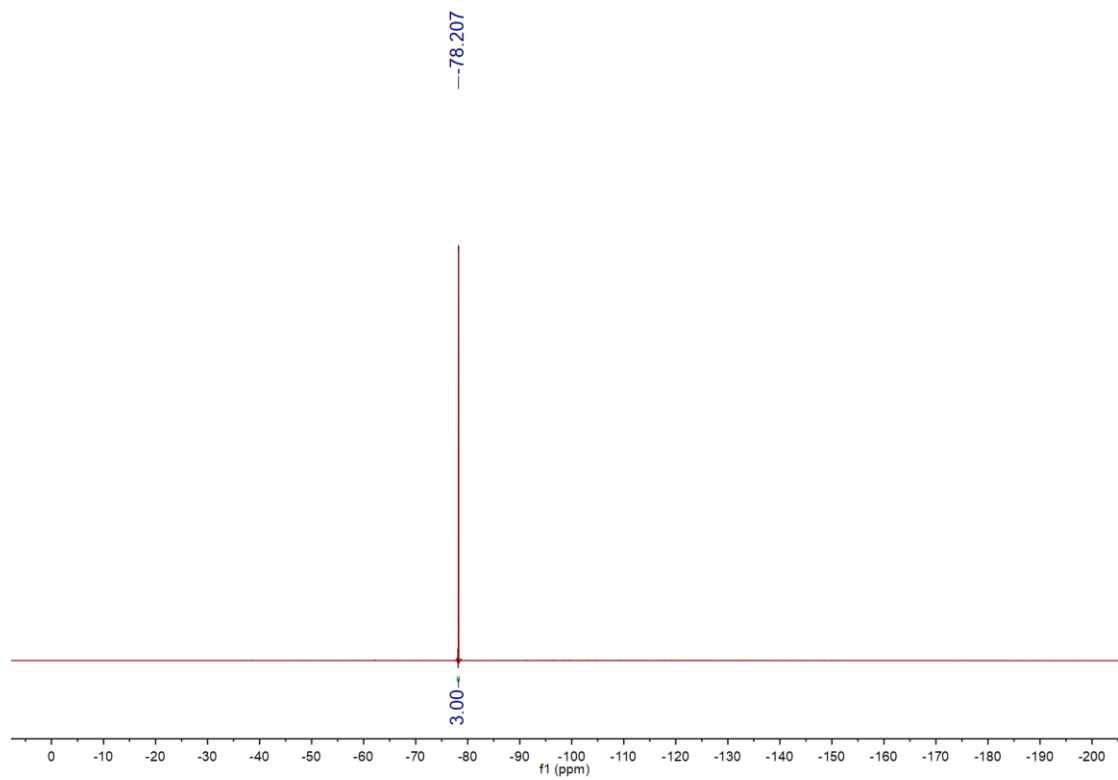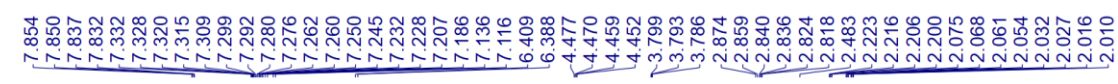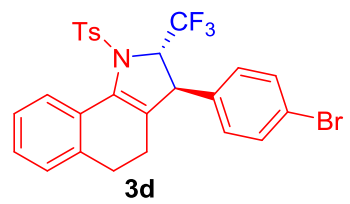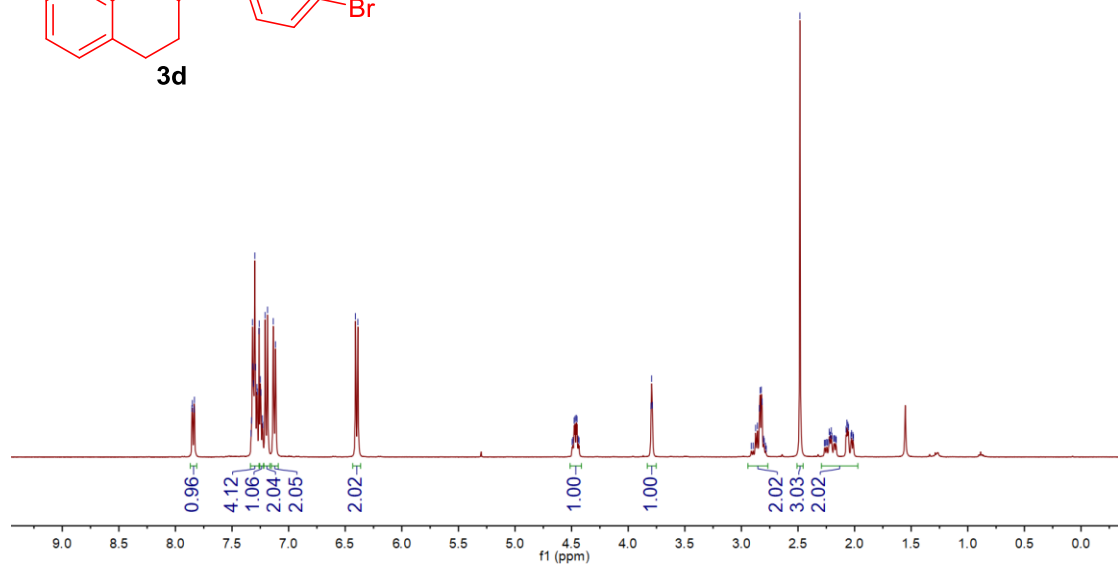

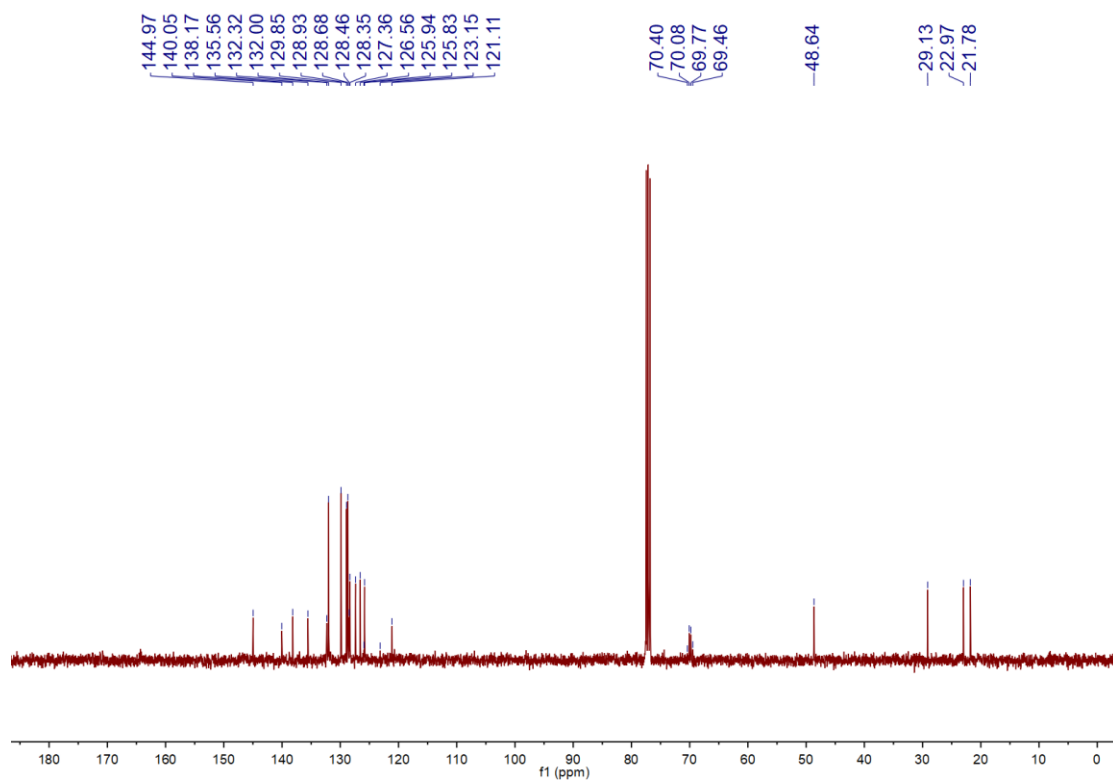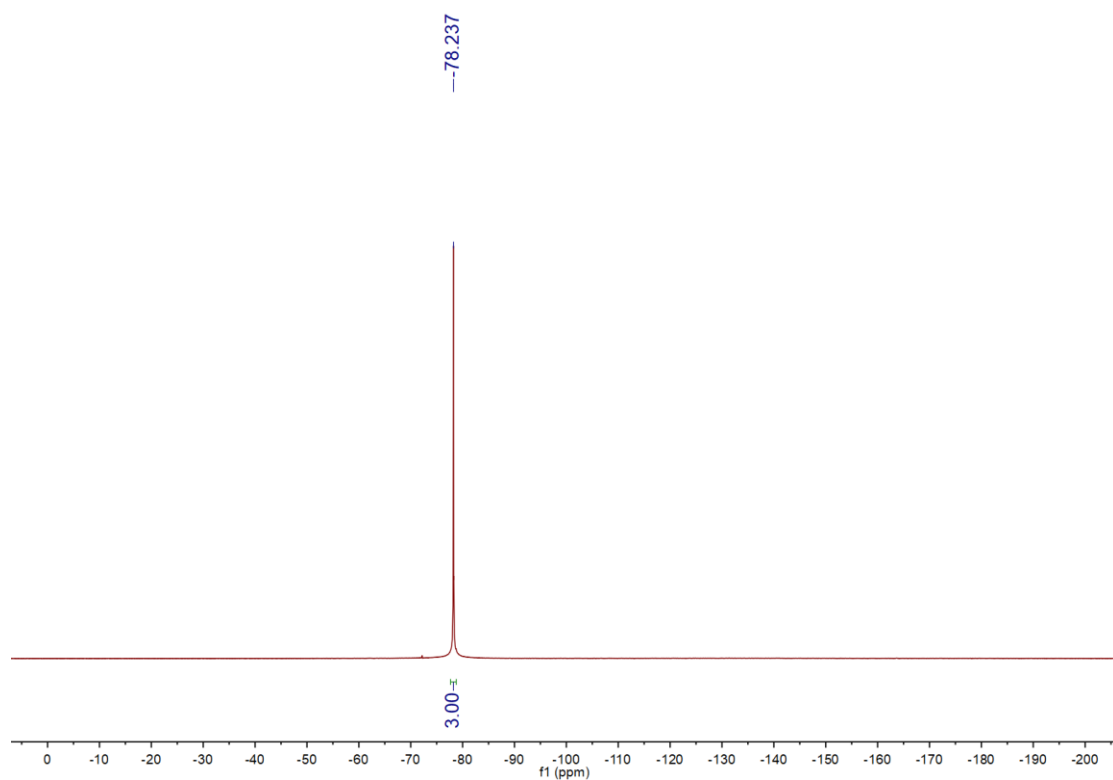

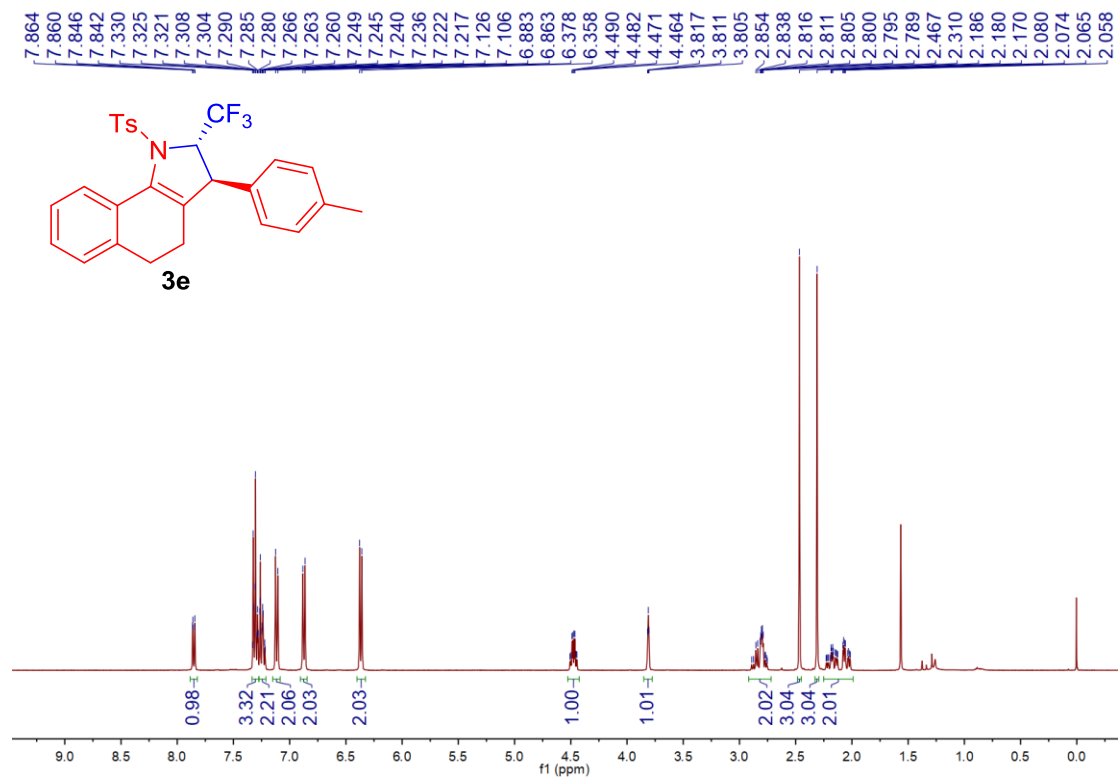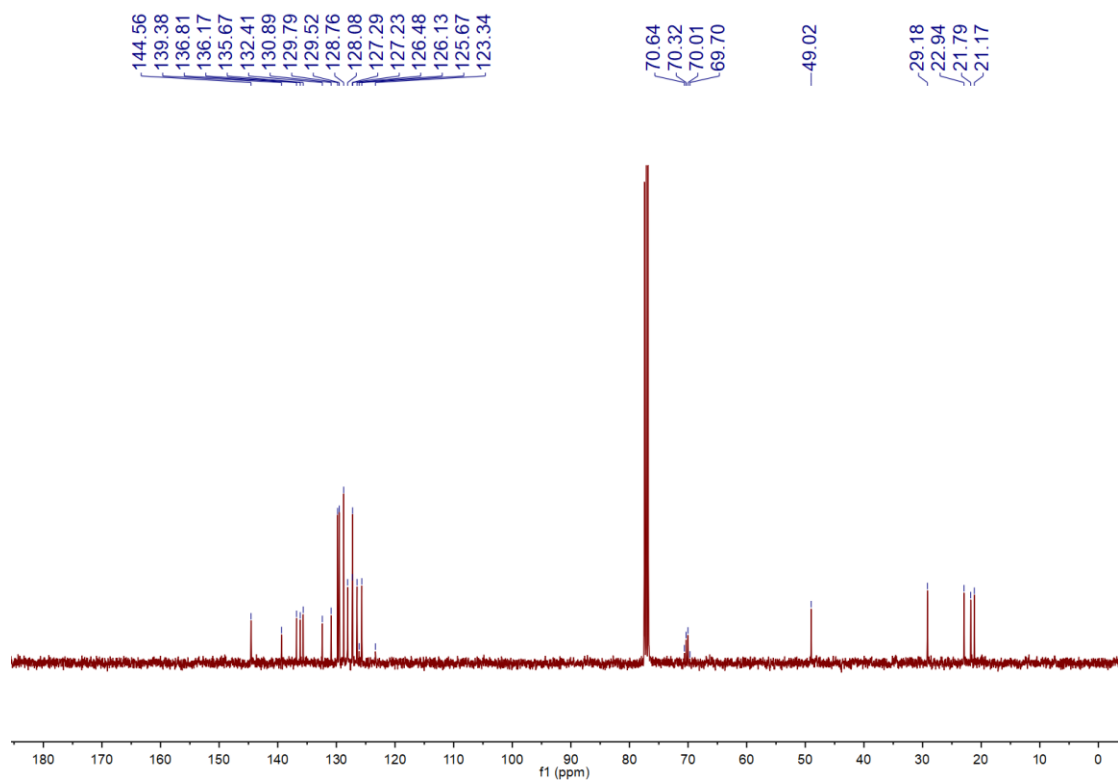

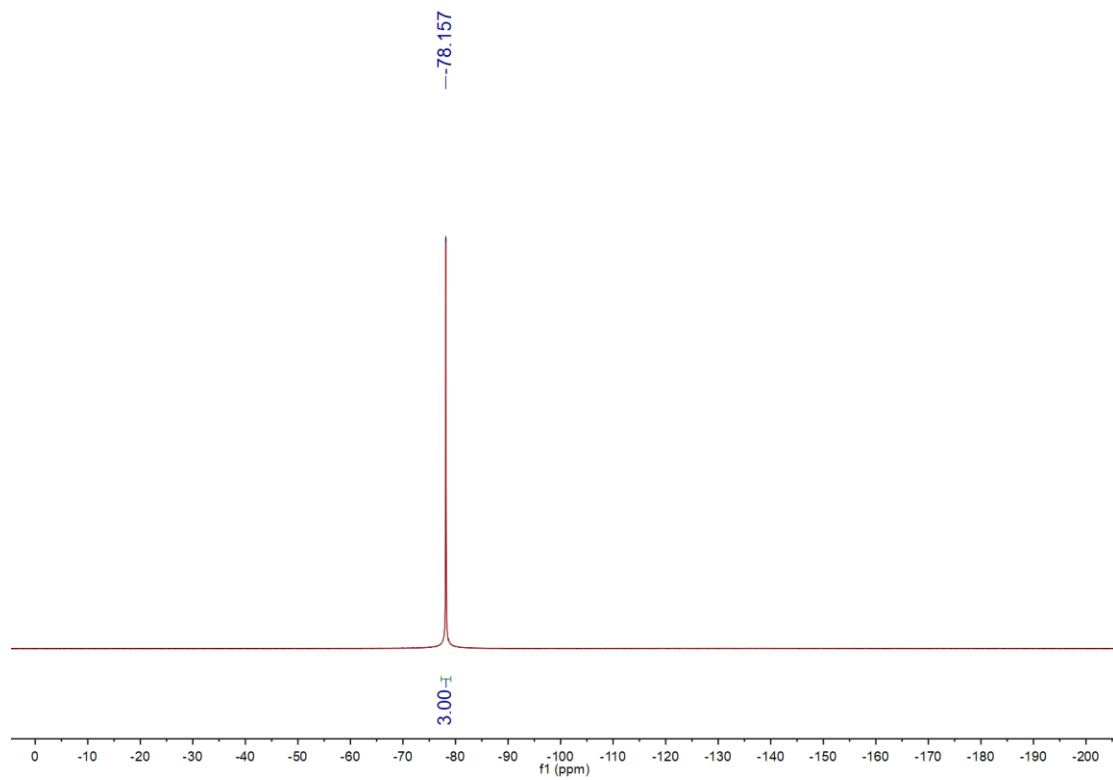

7.860  
7.841  
7.558  
7.341  
7.321  
7.306  
7.303  
7.289  
7.284  
7.280  
7.262  
7.260  
7.248  
7.240  
7.236  
7.222  
7.217  
7.162  
7.142  
6.607  
6.585  
6.387  
6.365  
4.486  
4.477  
4.467  
4.460  
4.449  
4.441  
3.830  
3.805  
3.797  
3.787  
2.845  
2.828  
2.810  
2.805  
2.794  
2.788  
2.475  
2.188  
2.181  
2.174  
2.164  
2.158  
2.062  
2.055  
2.047  
2.040  
2.019  
2.013

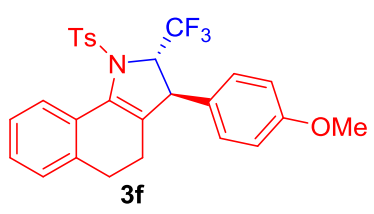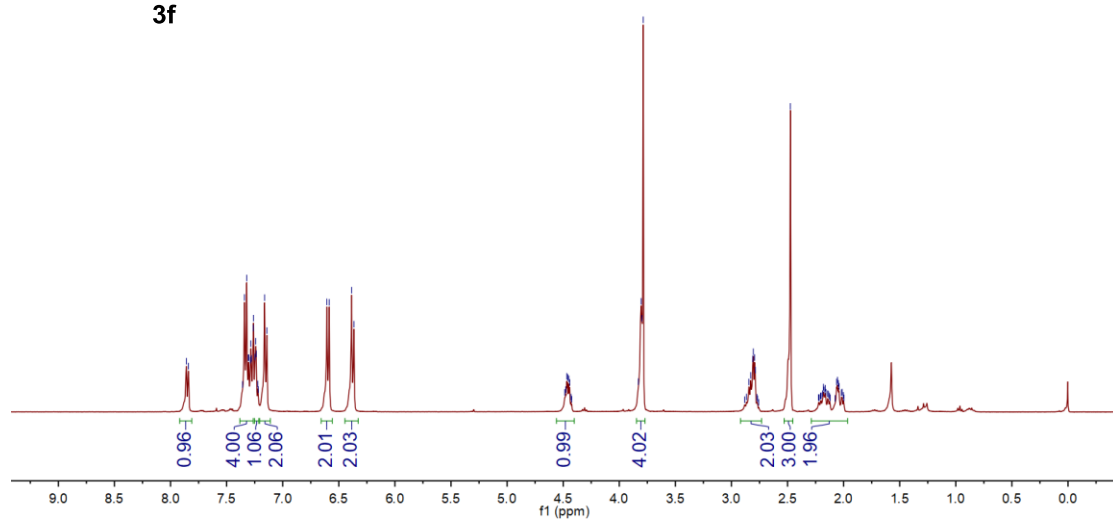



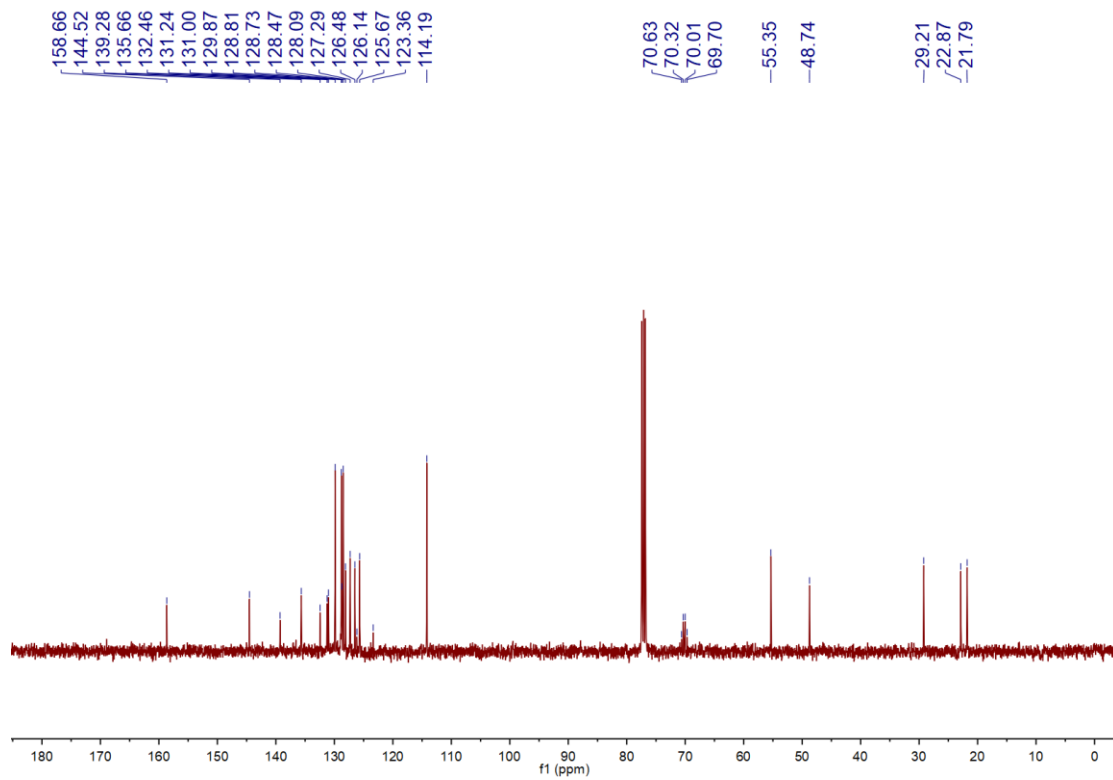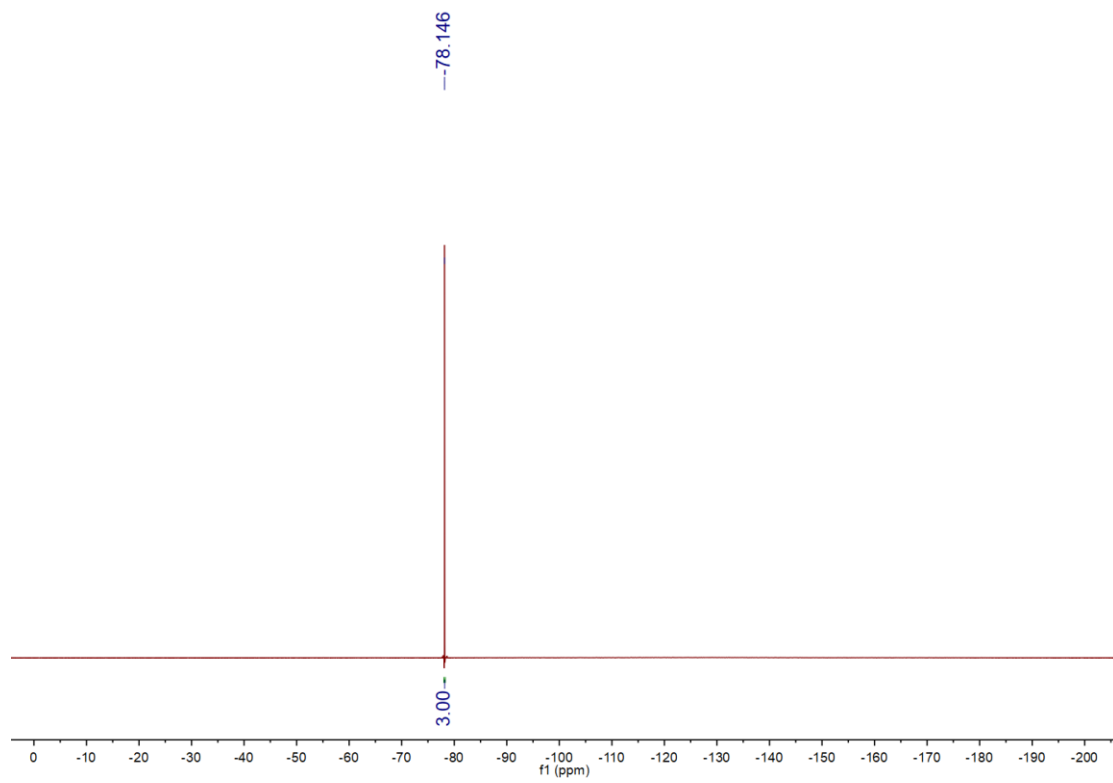

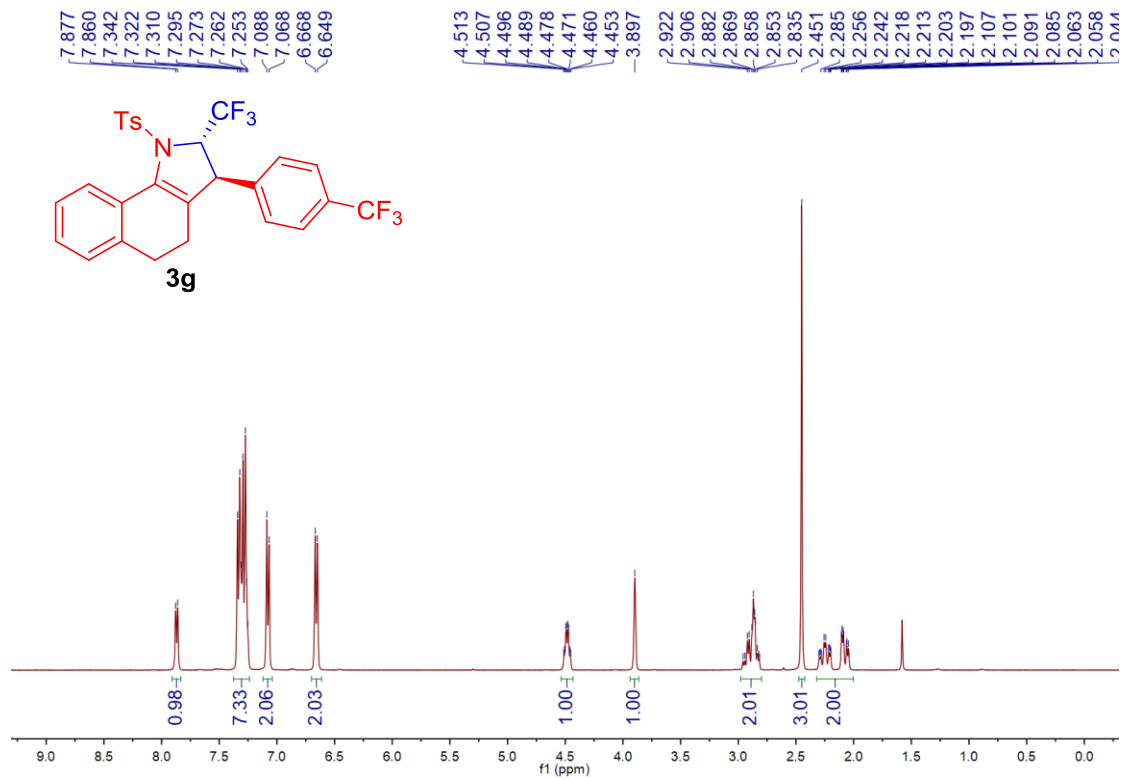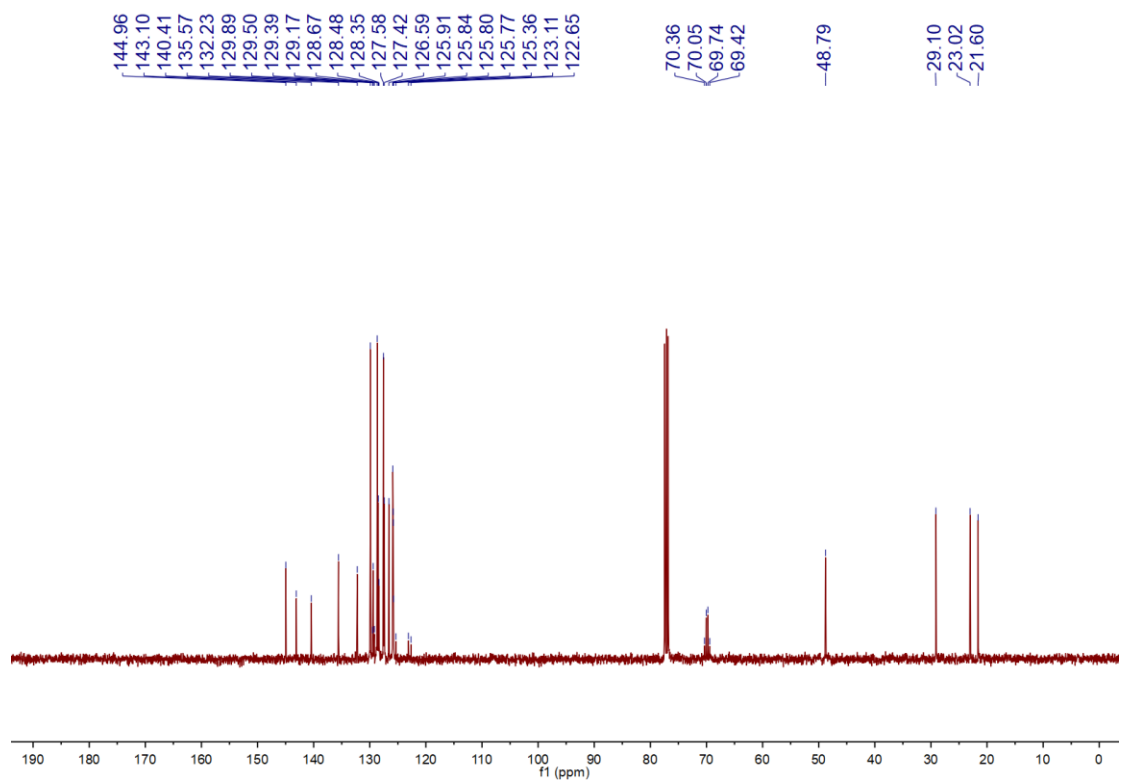

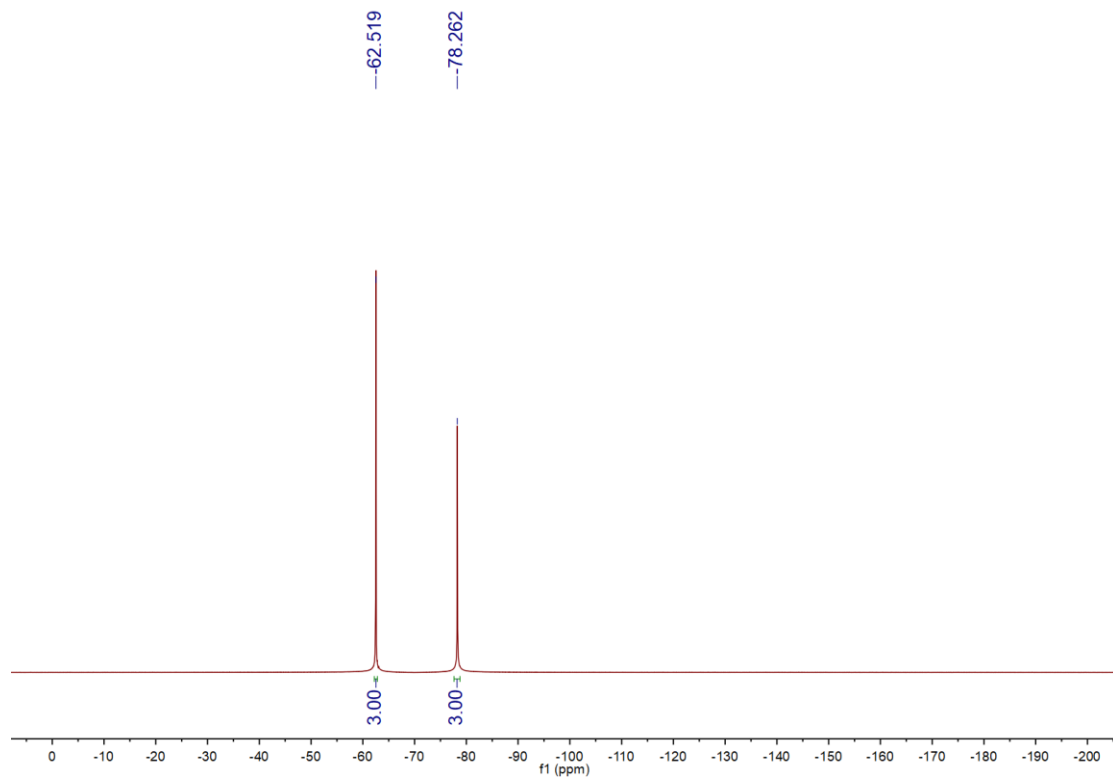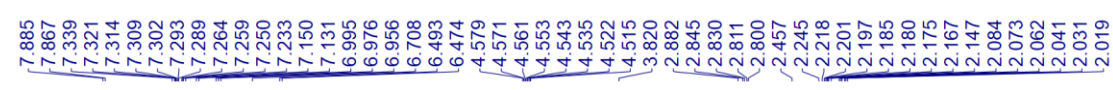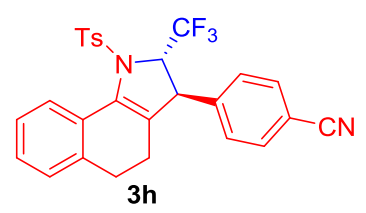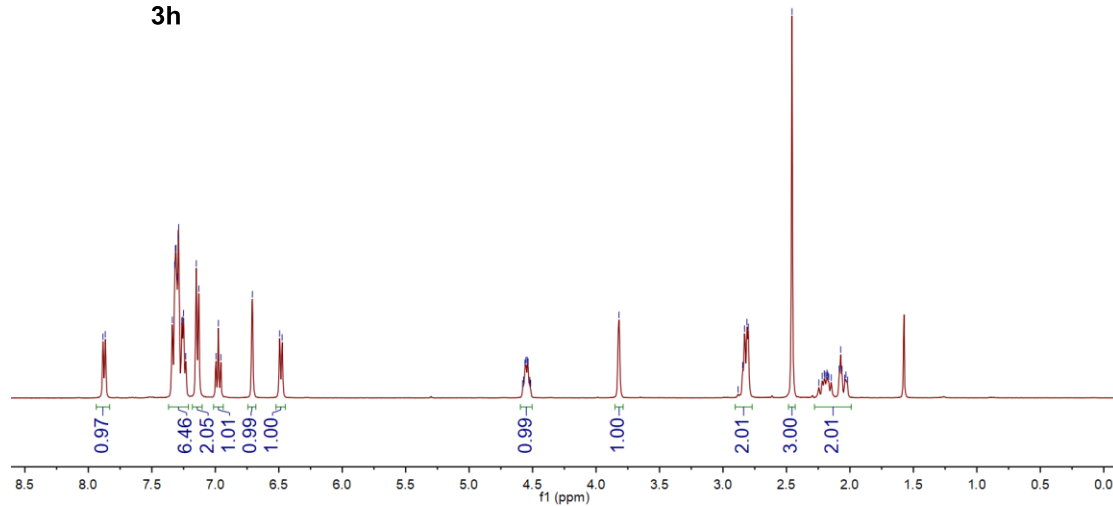

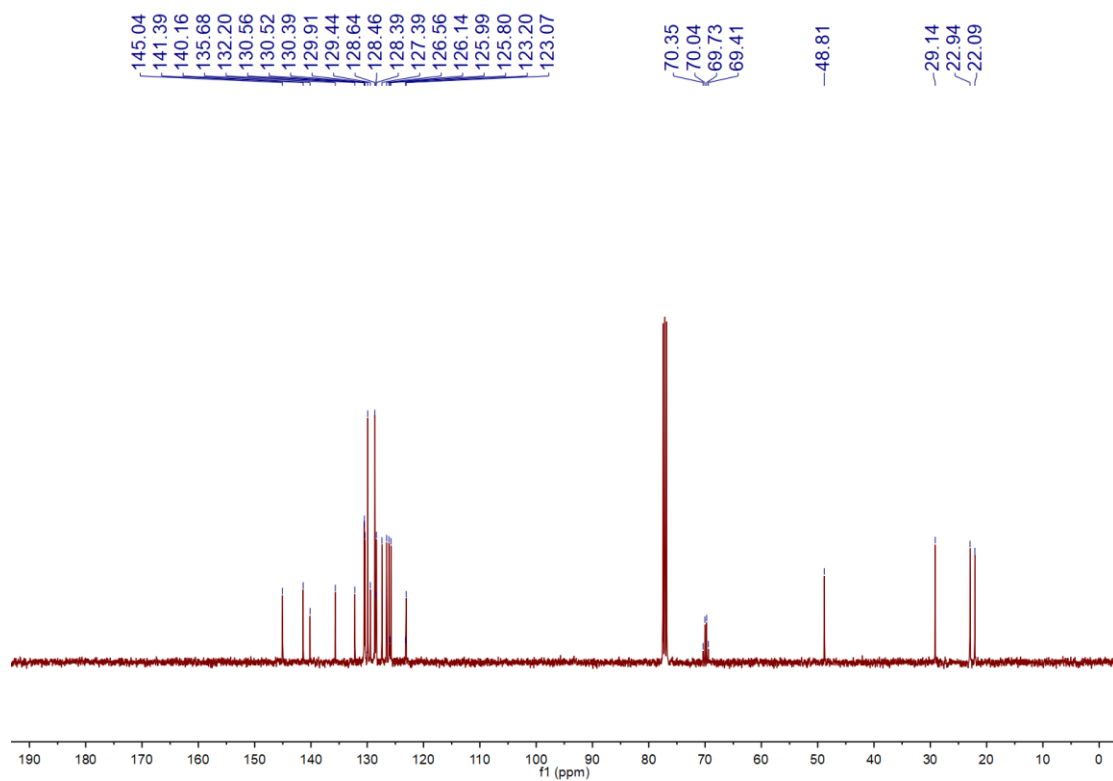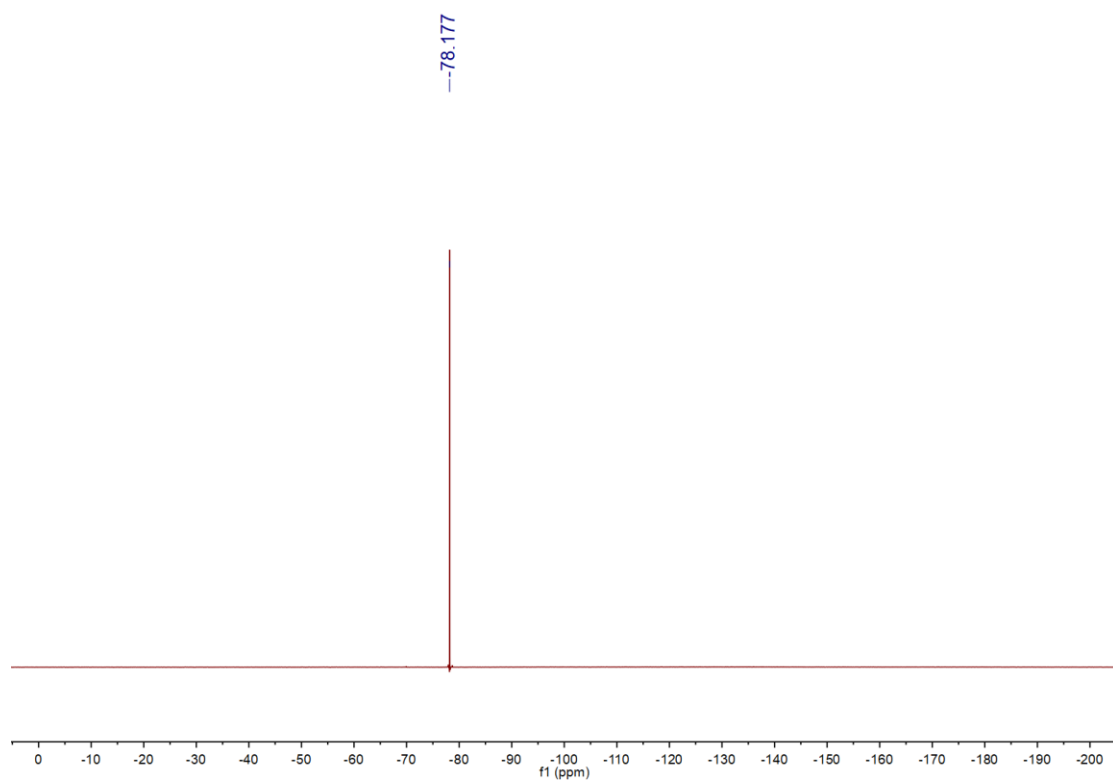

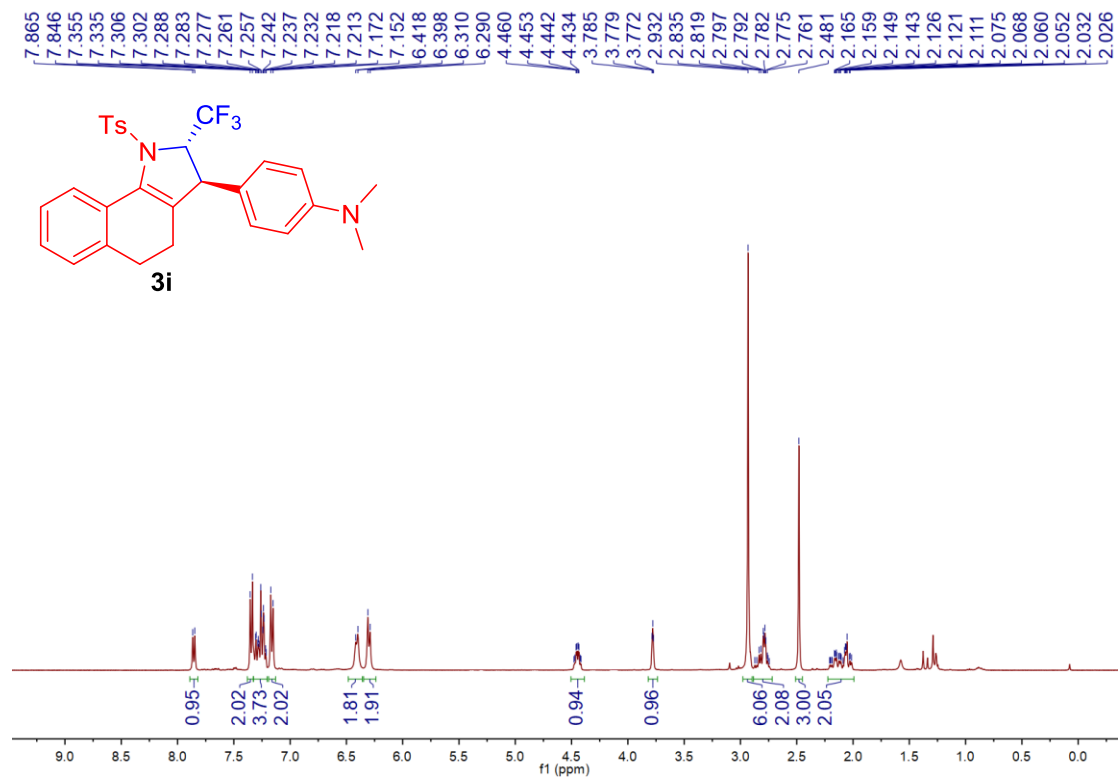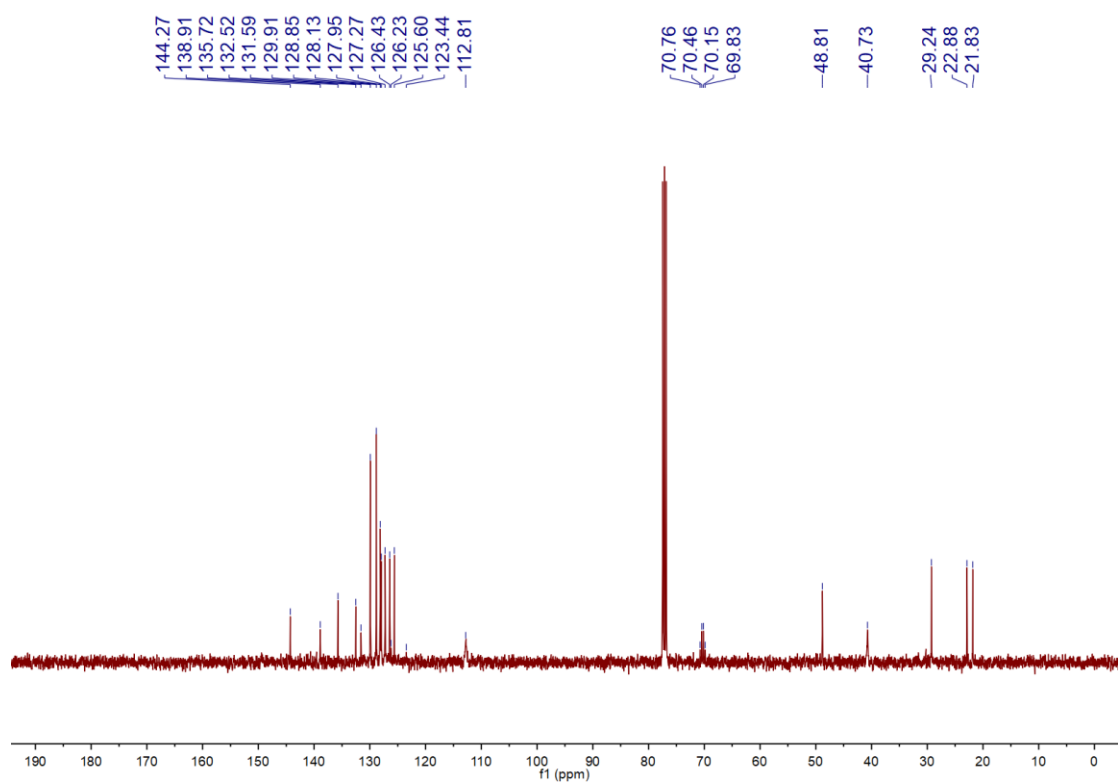

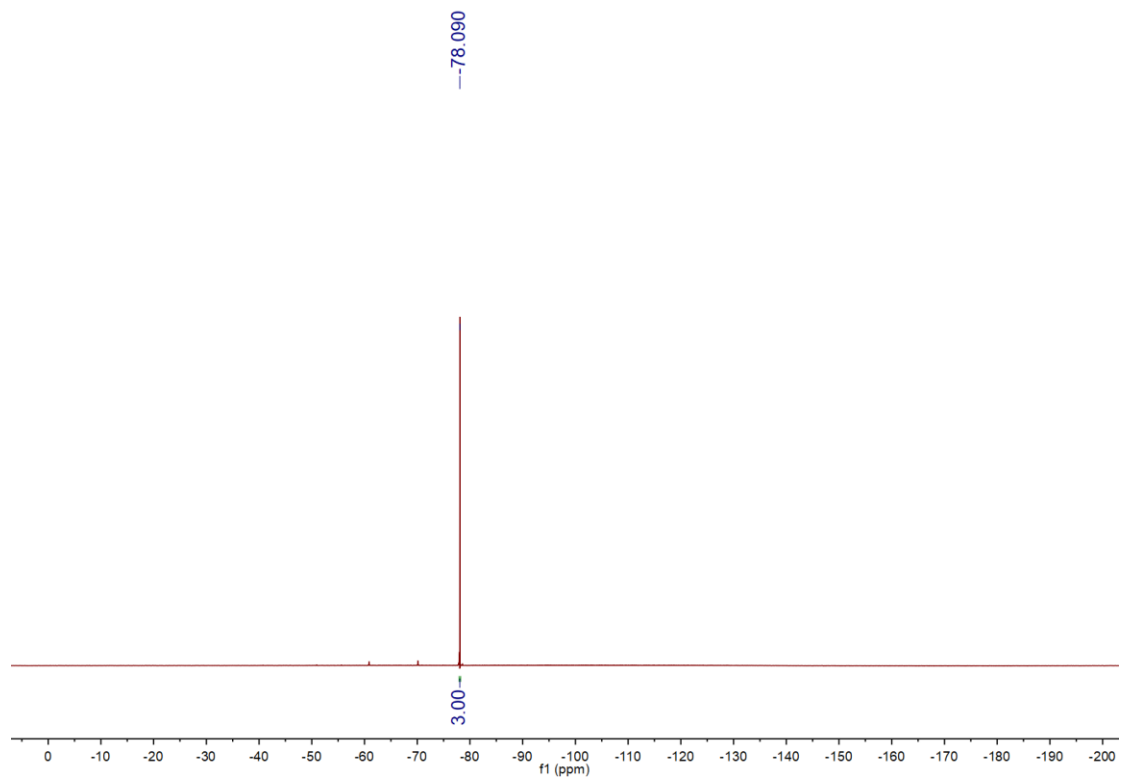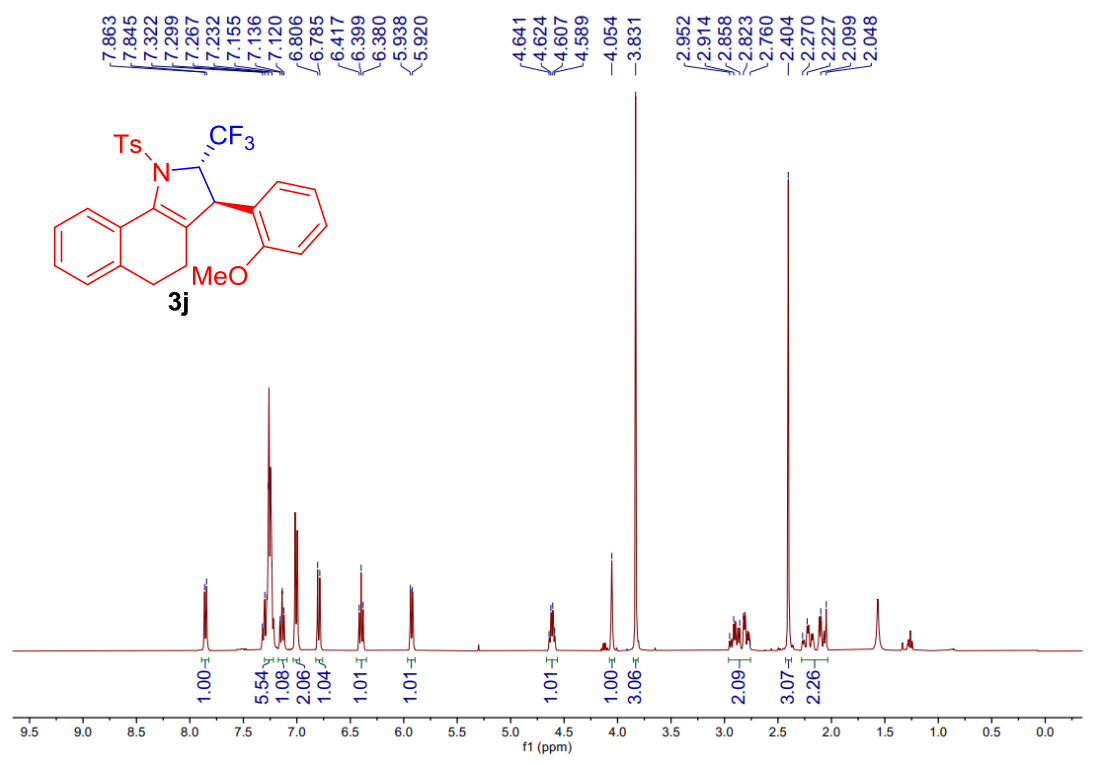

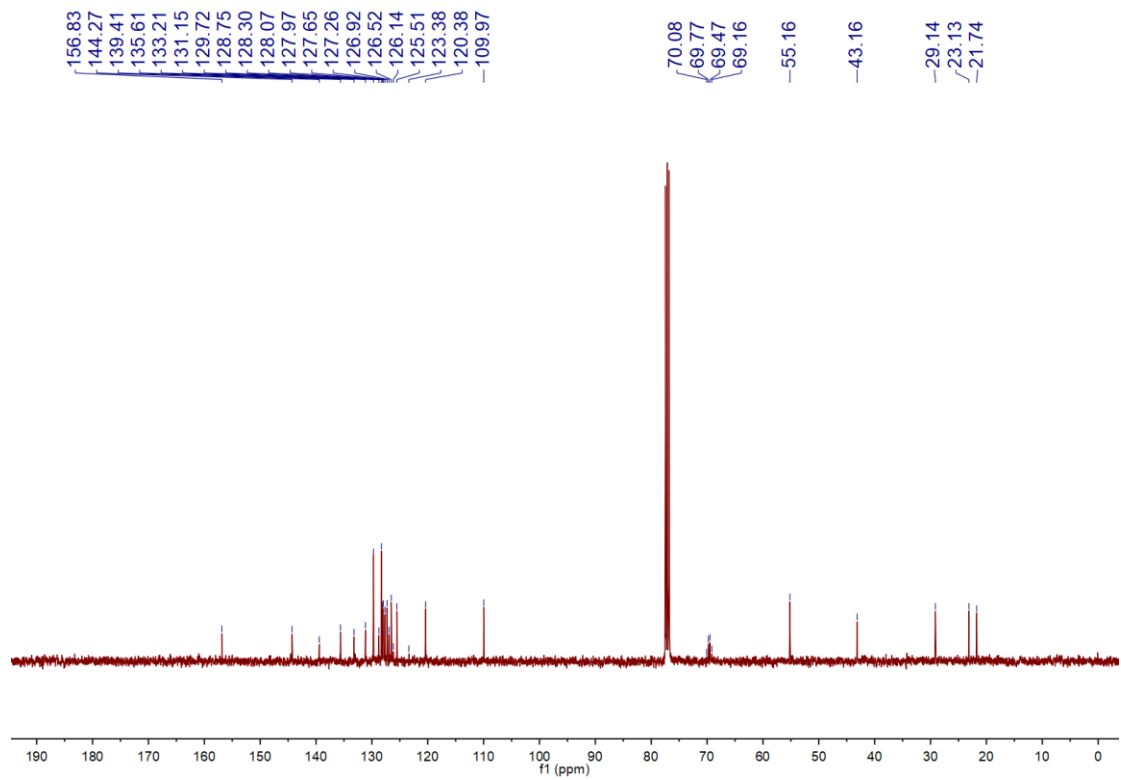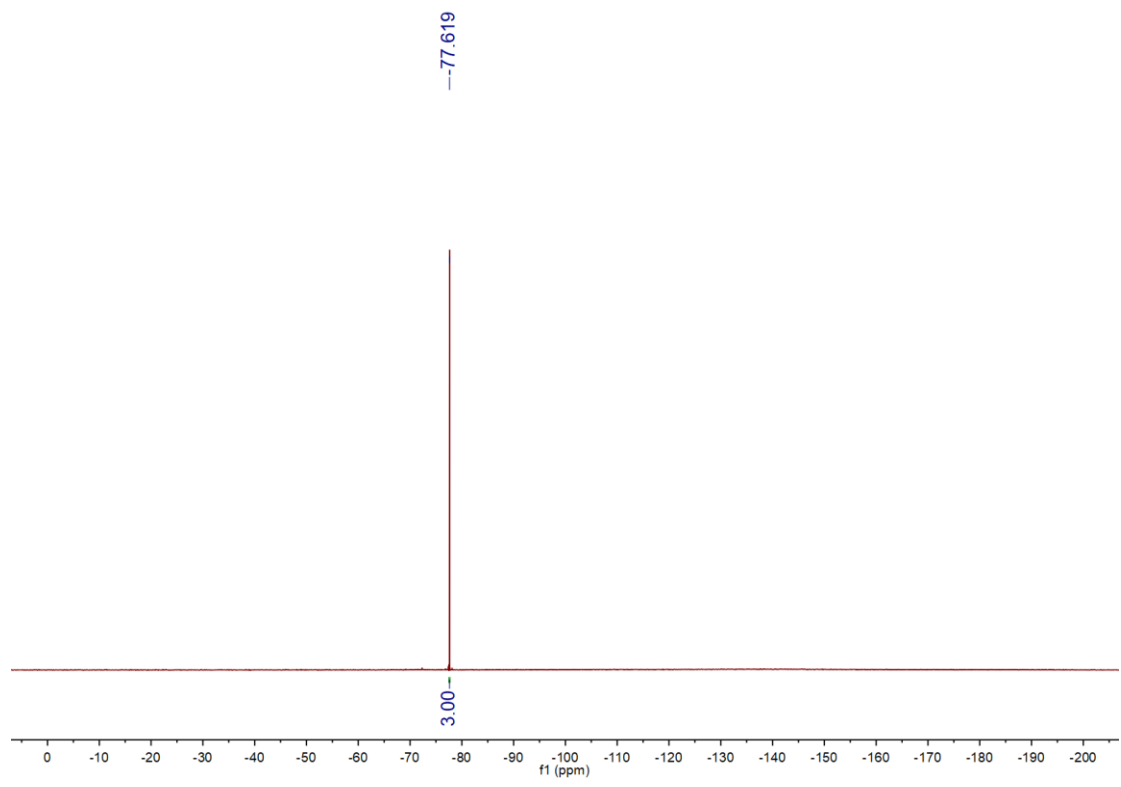

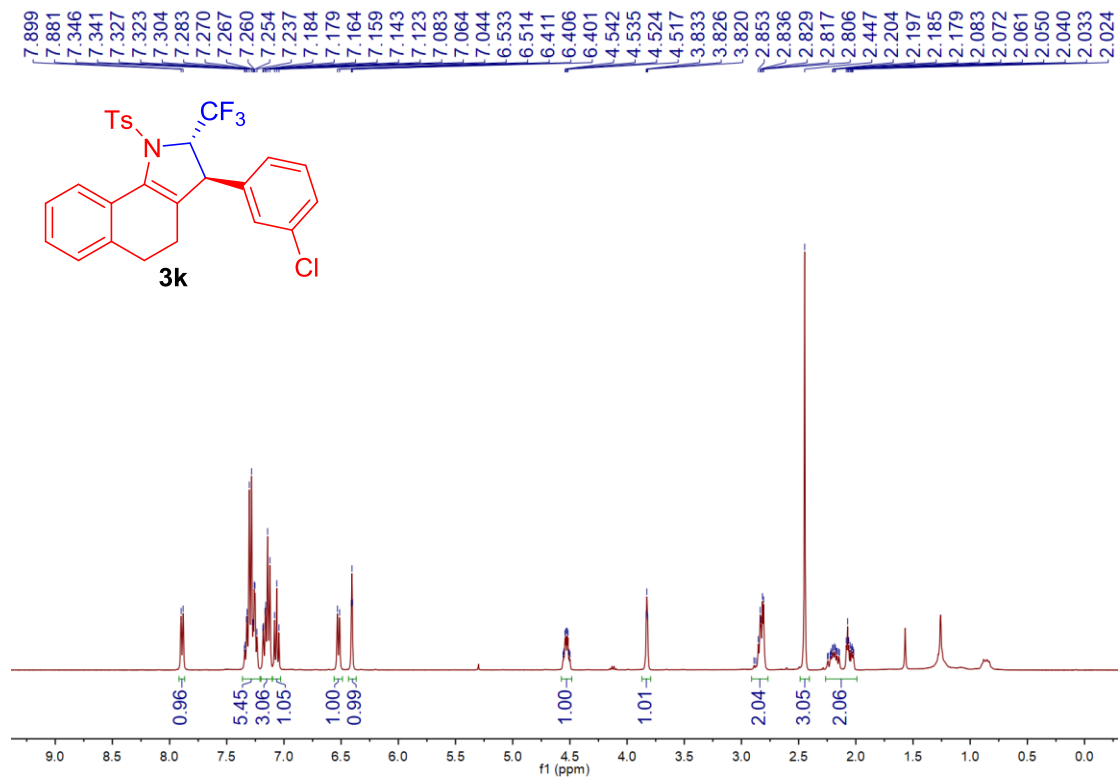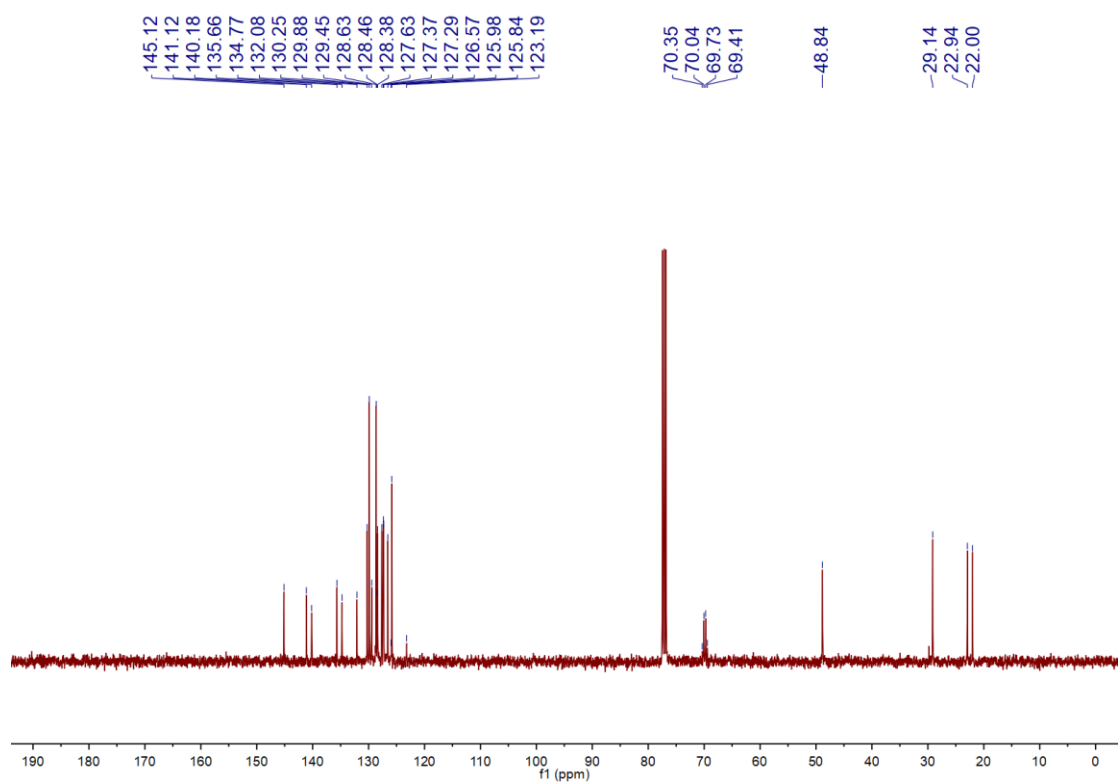



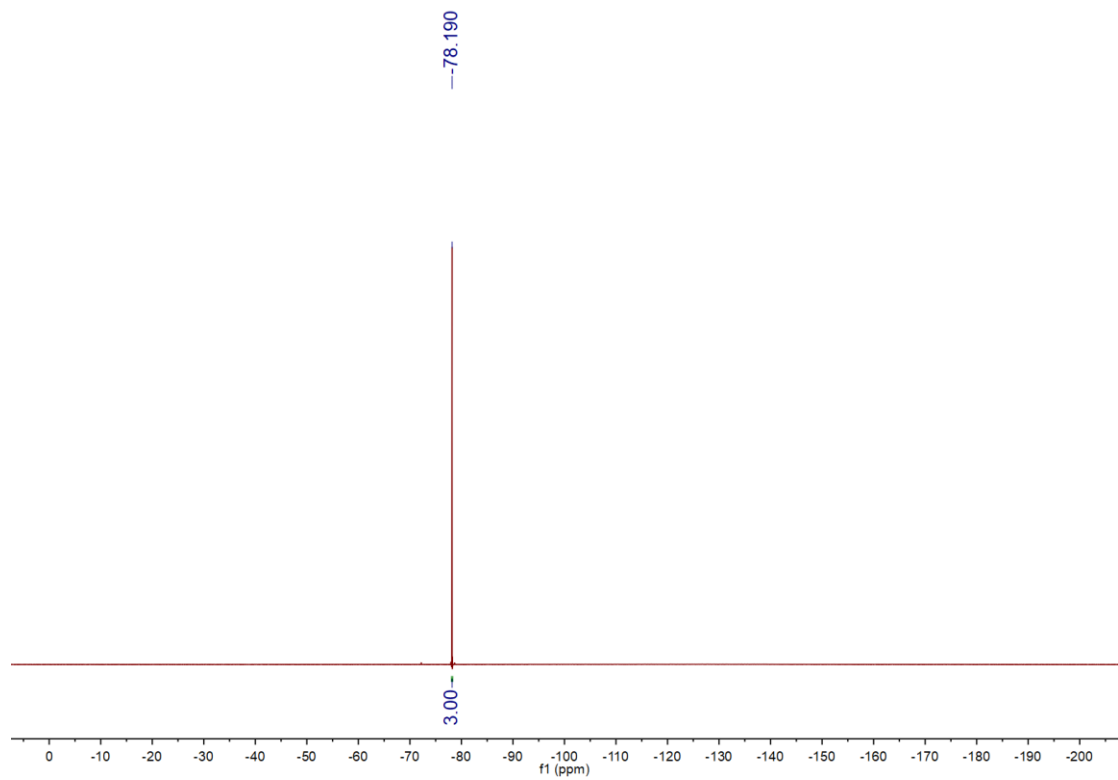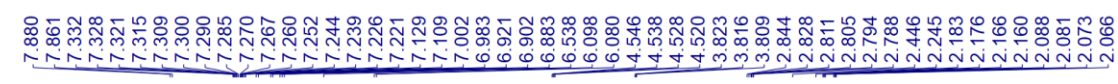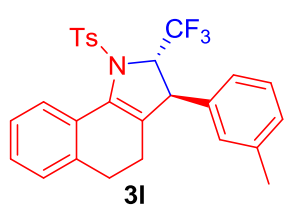

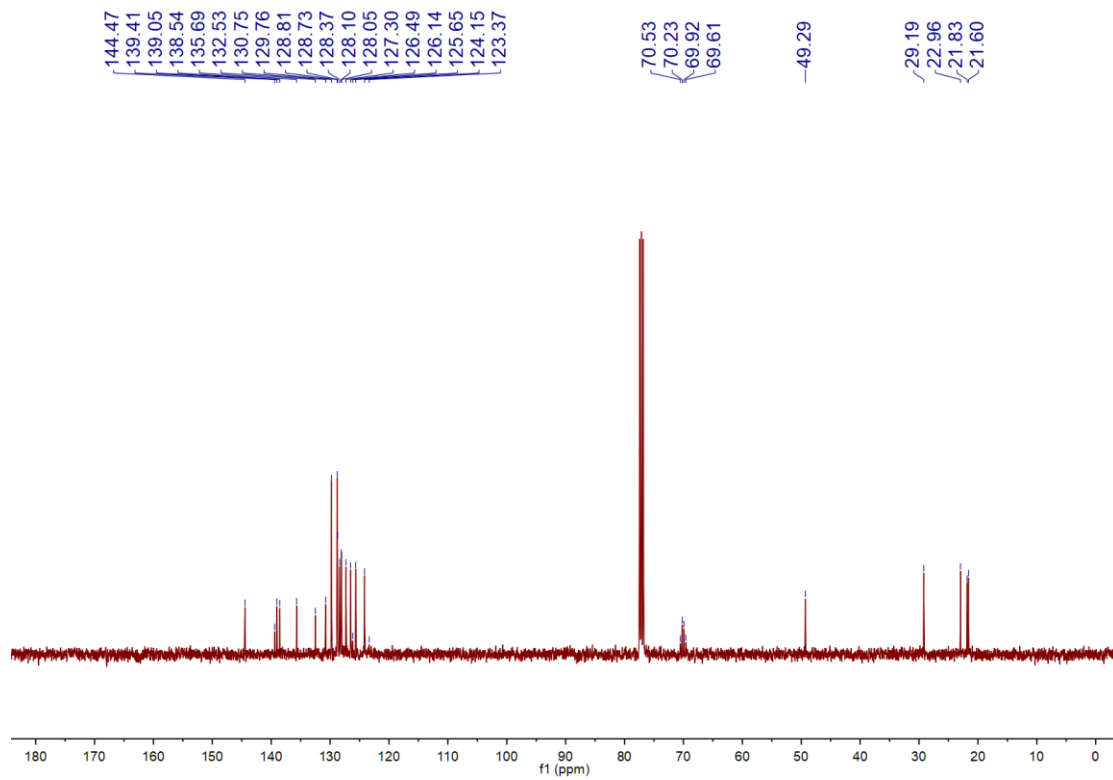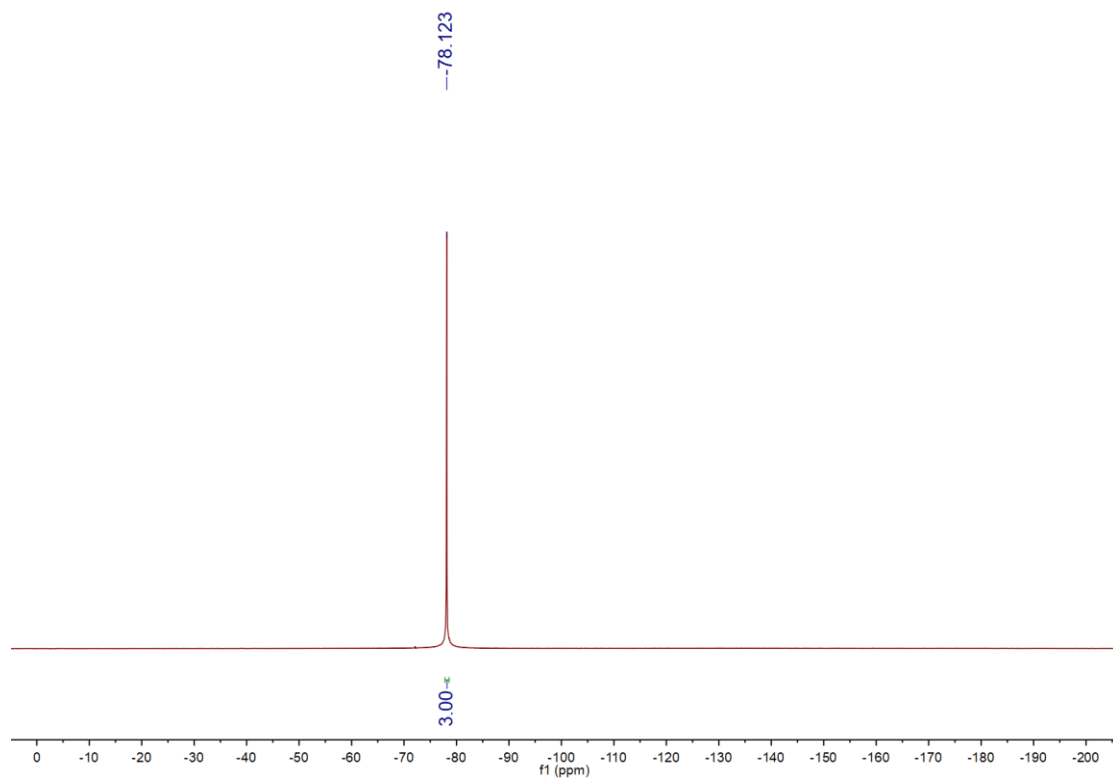

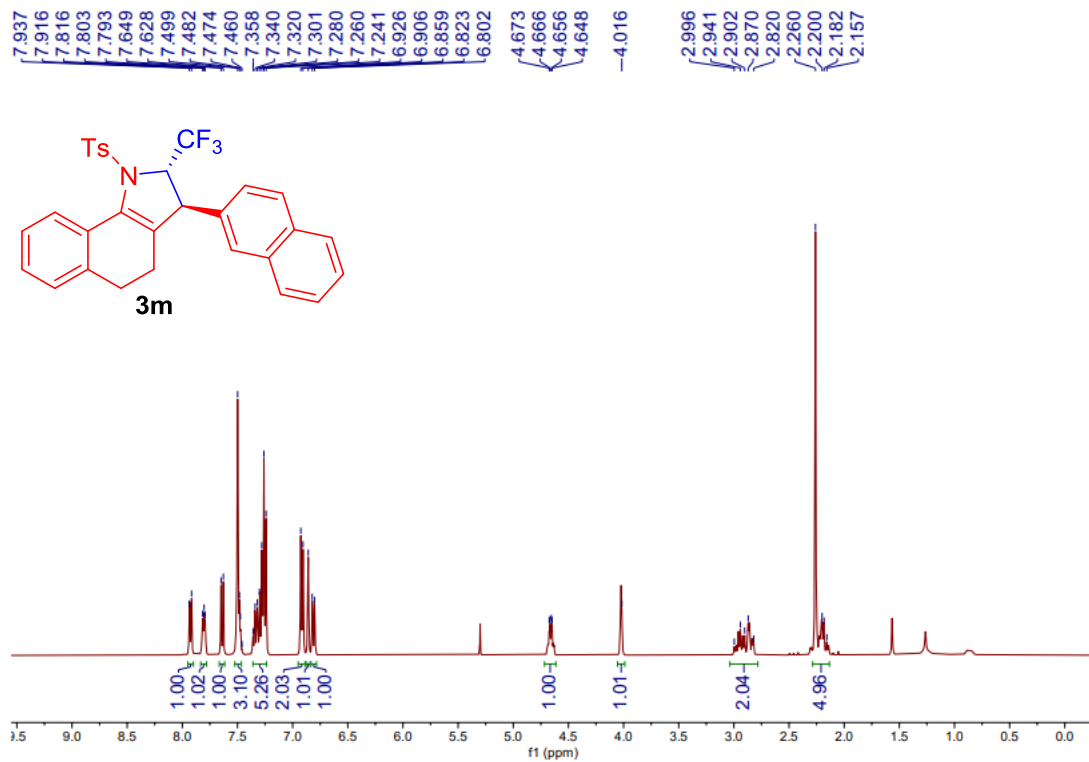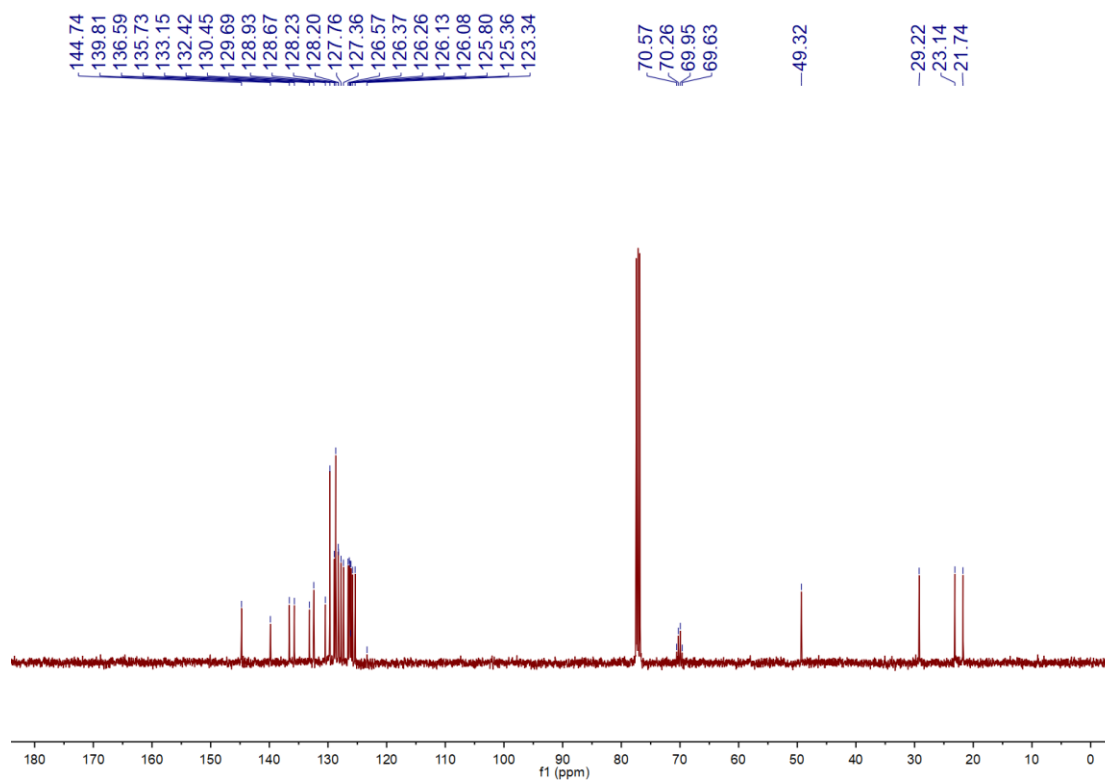

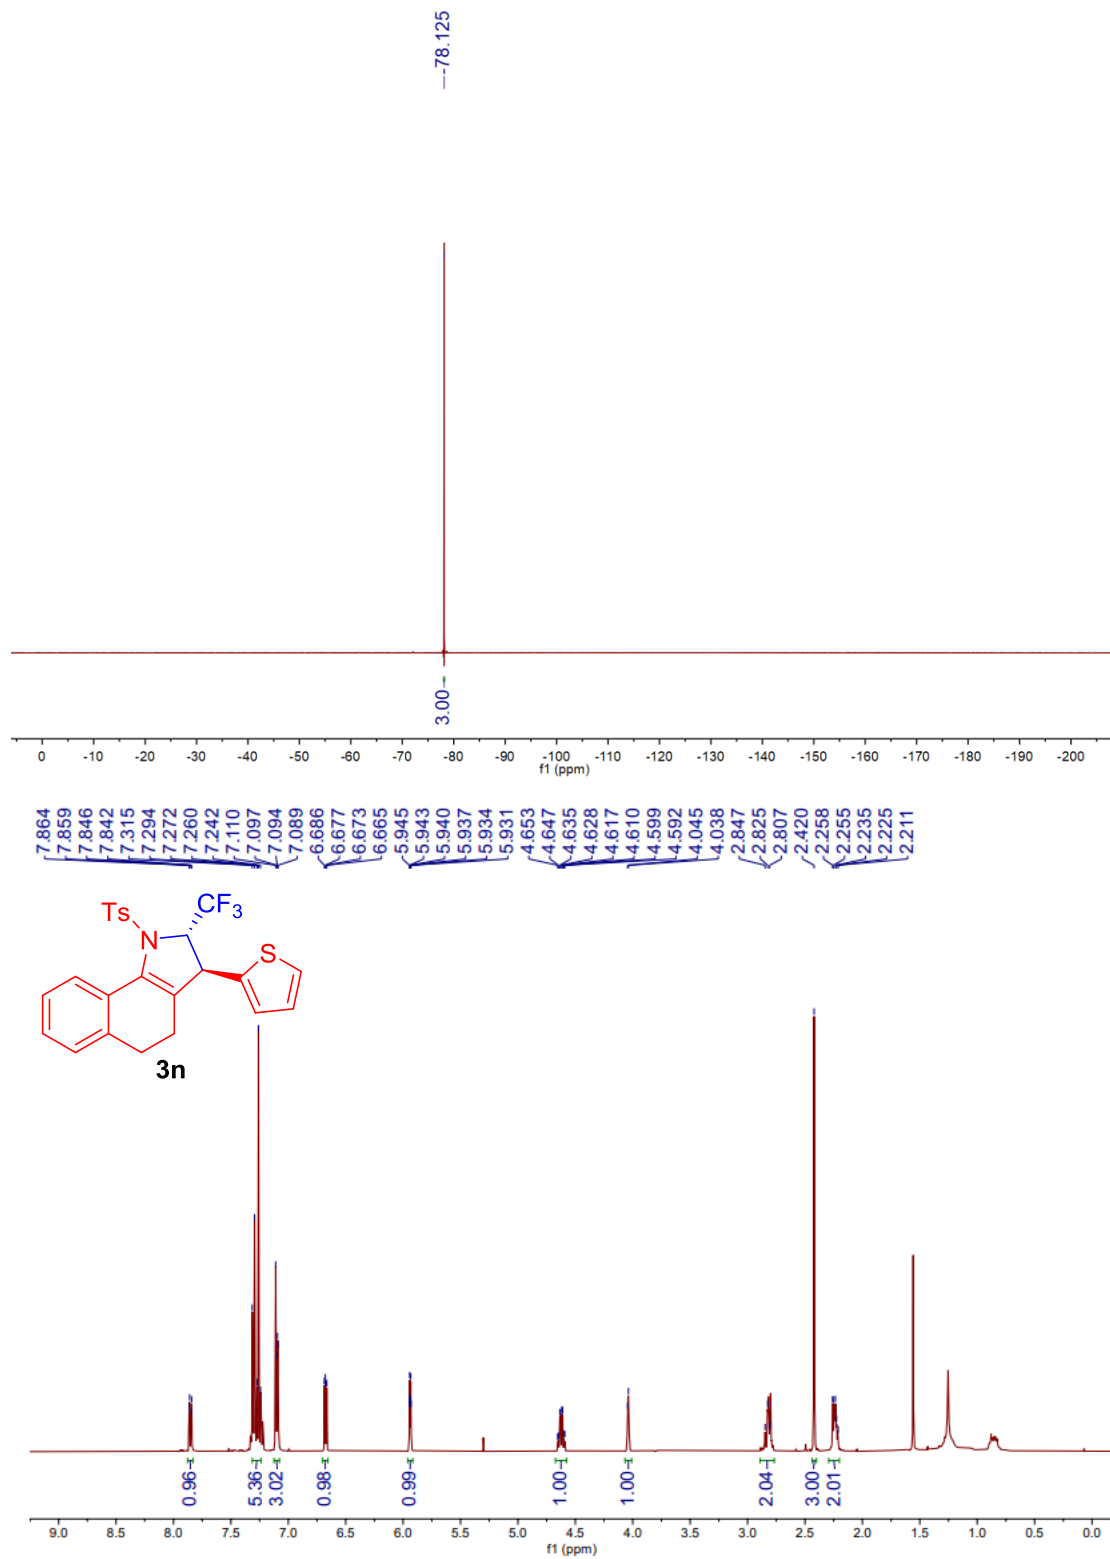

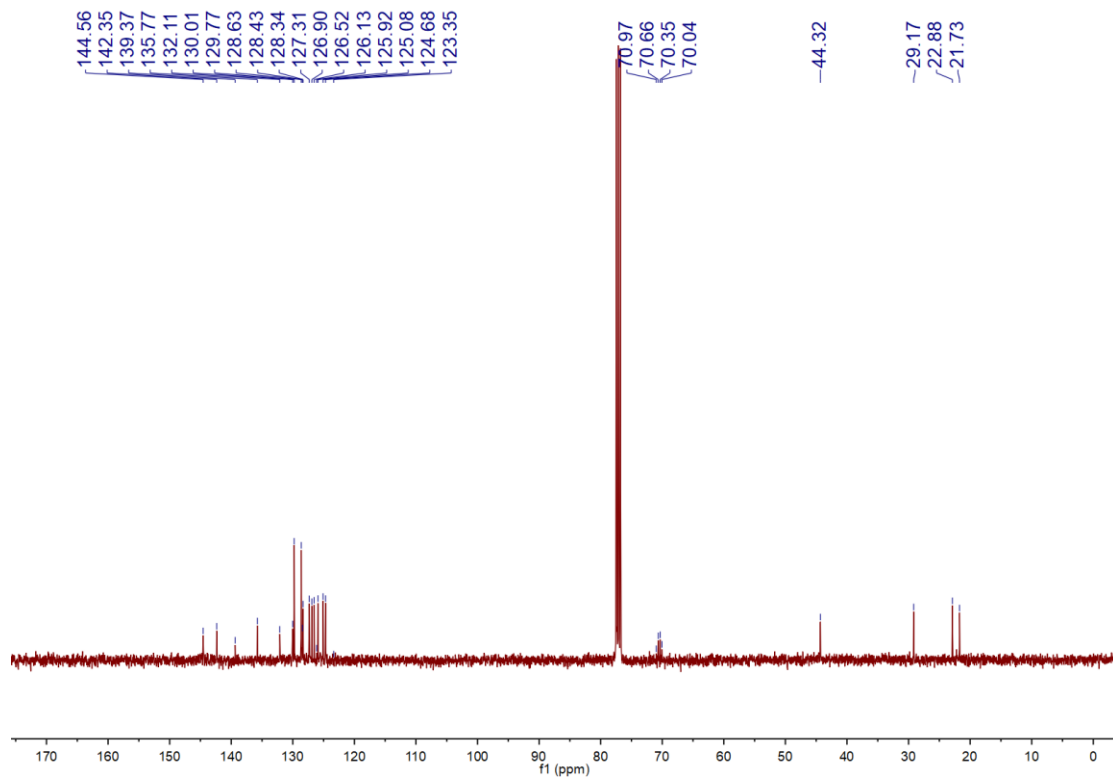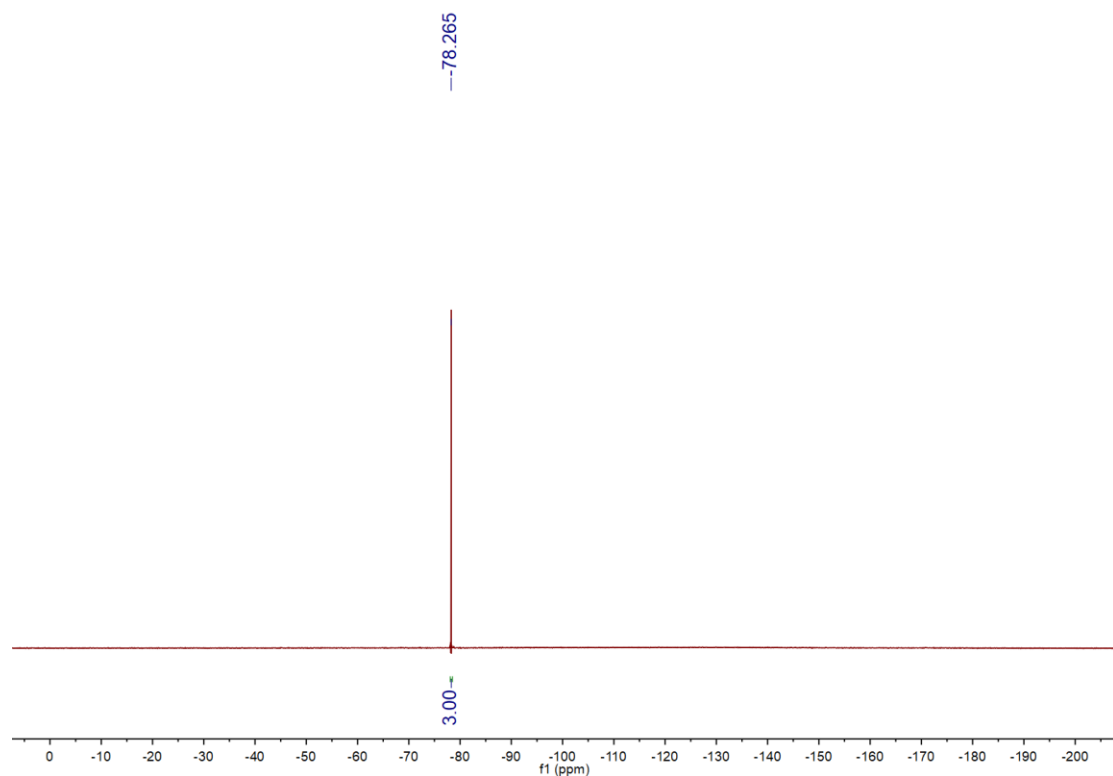

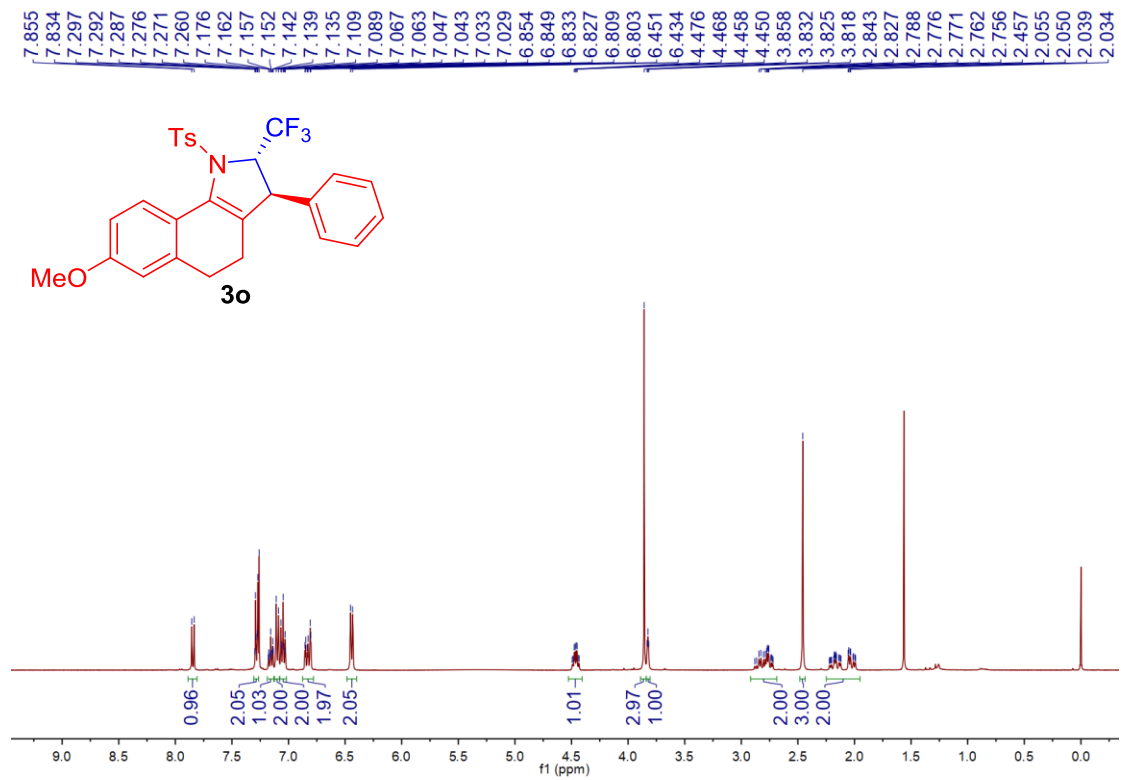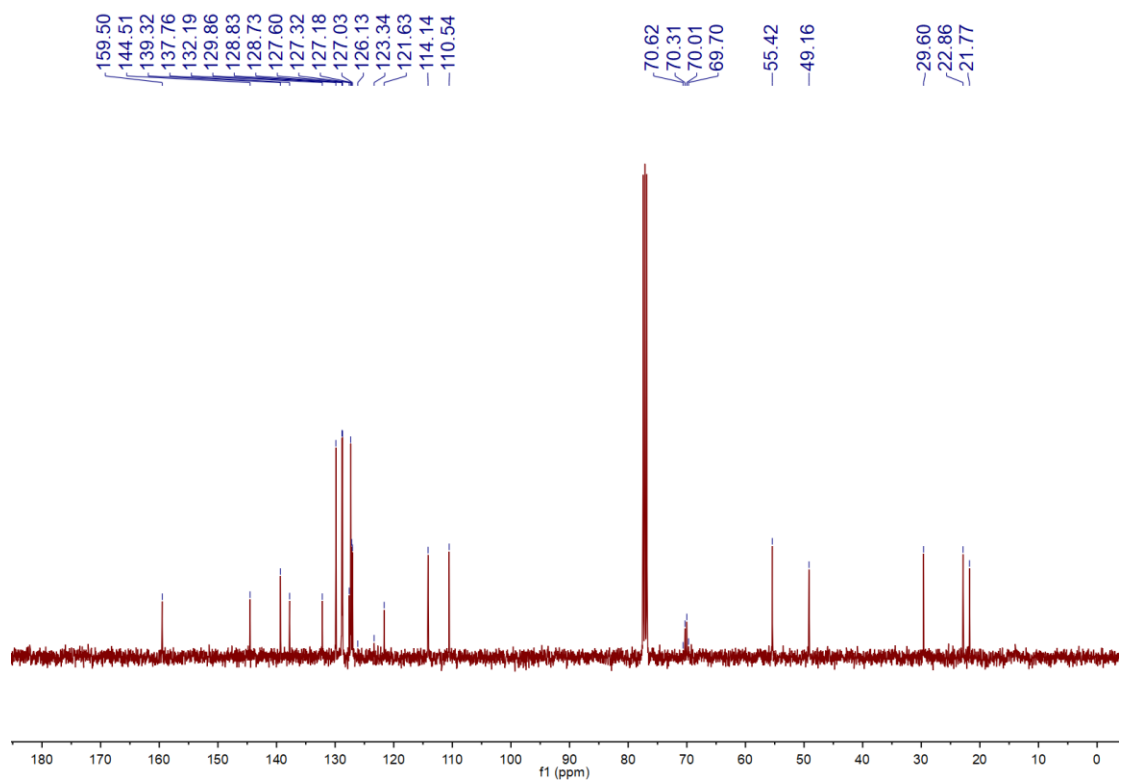

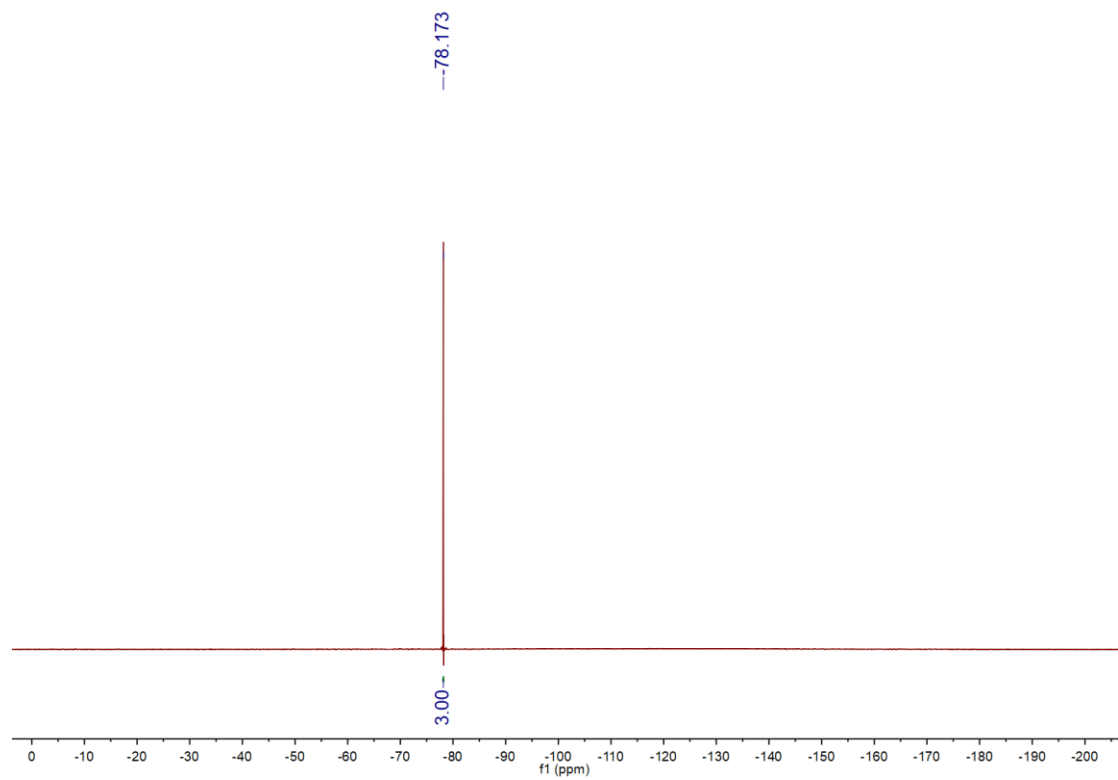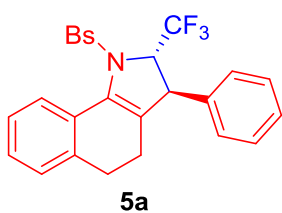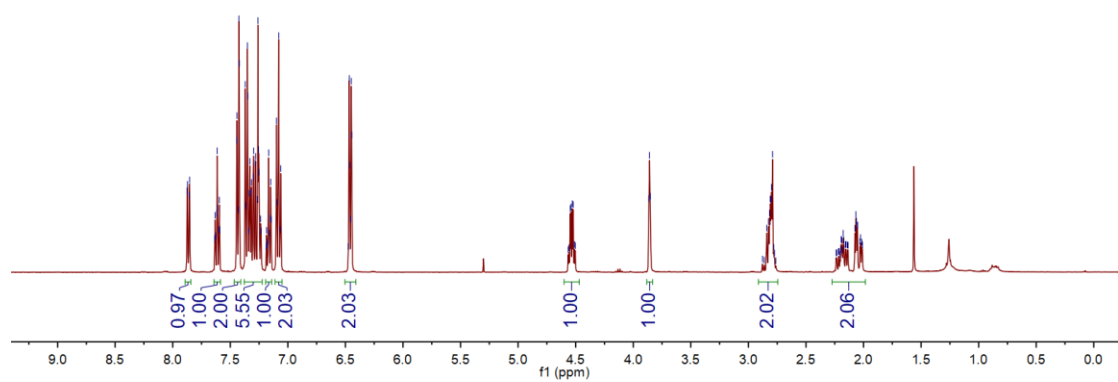

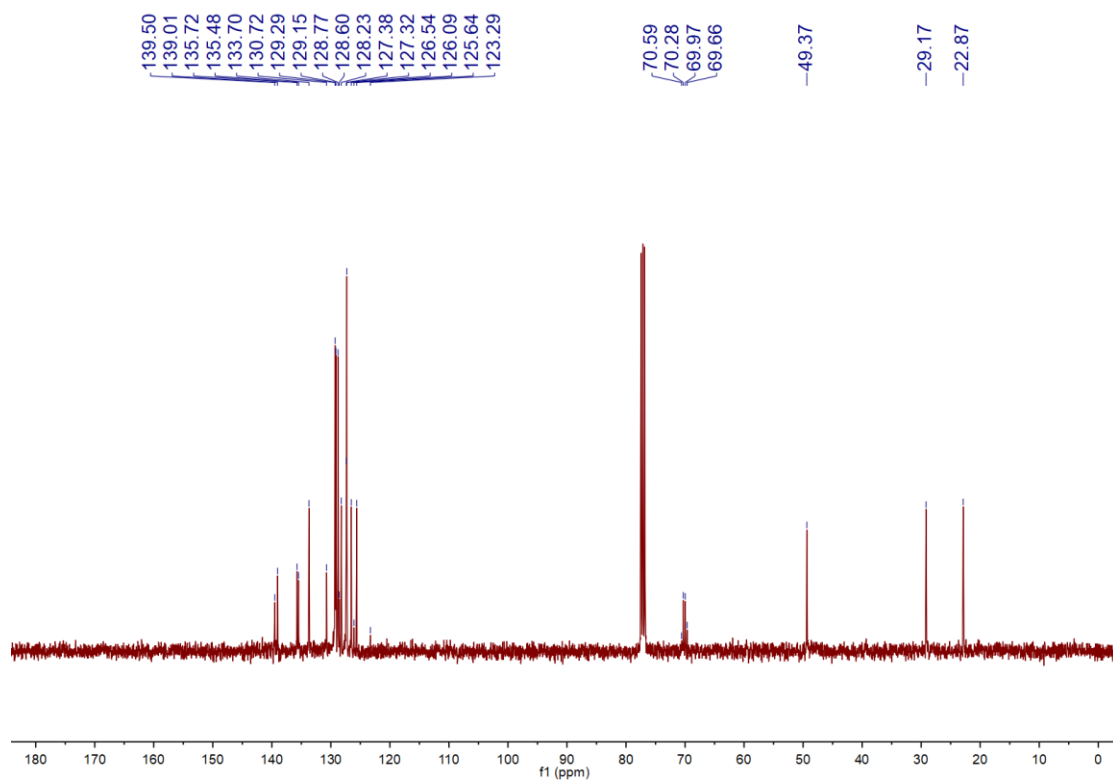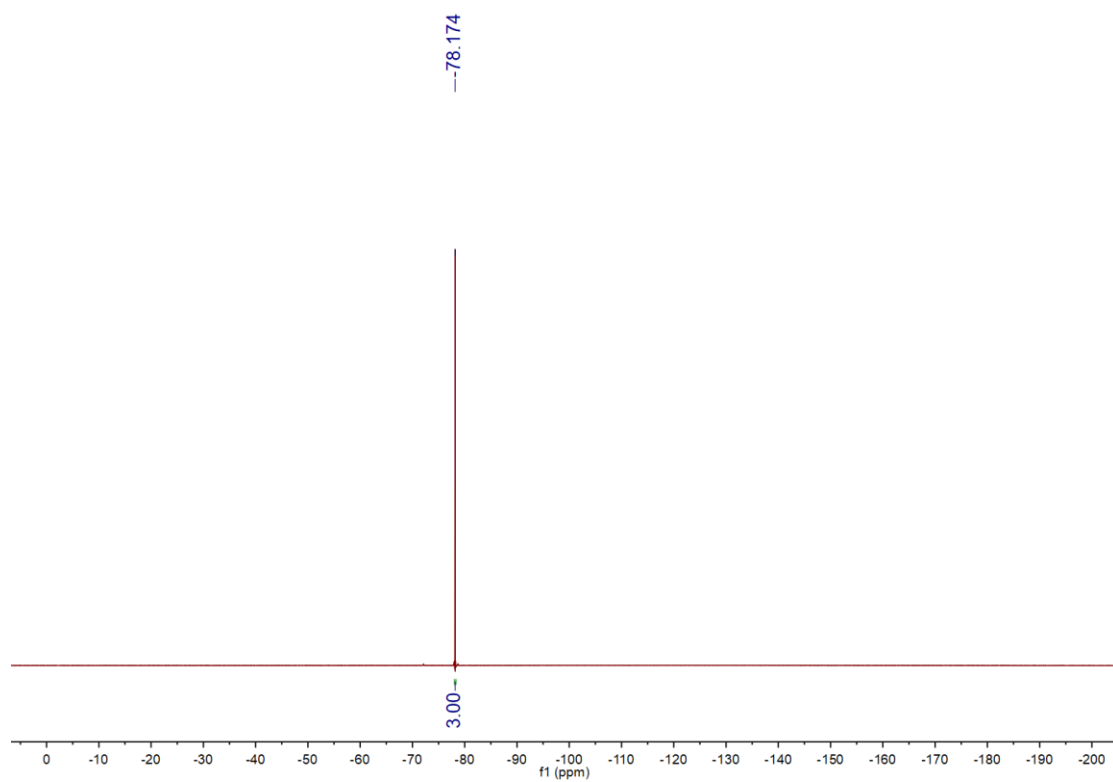



8.063  
8.058  
8.046  
8.041  
8.035  
7.842  
7.836  
7.828  
7.824  
7.820  
7.564  
7.558  
7.553  
7.541  
7.536  
7.344  
7.338  
7.329  
7.320  
7.315  
7.302  
7.296  
7.291  
7.286  
7.280  
7.260  
7.194  
7.176  
7.161  
7.157  
7.063  
7.059  
7.043  
7.029  
7.024  
6.548  
6.530  
4.572  
4.561  
4.555  
3.907  
3.901  
2.901  
2.894  
2.882  
2.870  
2.222  
2.210  
2.198

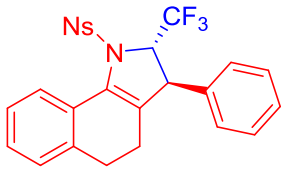

**5b**

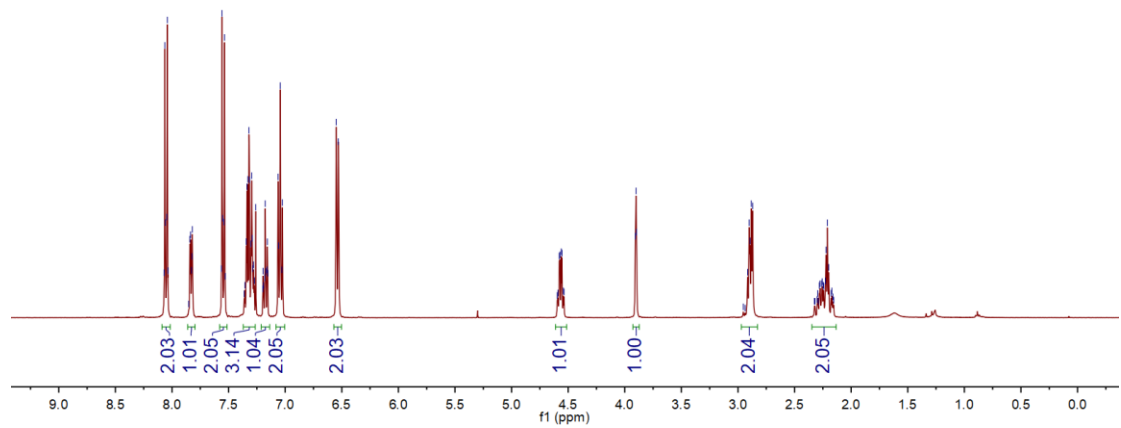

150.79  
140.56  
139.26  
138.77  
135.60  
131.40  
129.72  
129.09  
128.71  
127.88  
127.66  
127.54  
126.74  
125.70  
125.58  
124.20  
122.92  
71.28  
70.96  
70.65  
70.34  
48.57  
29.07  
23.27

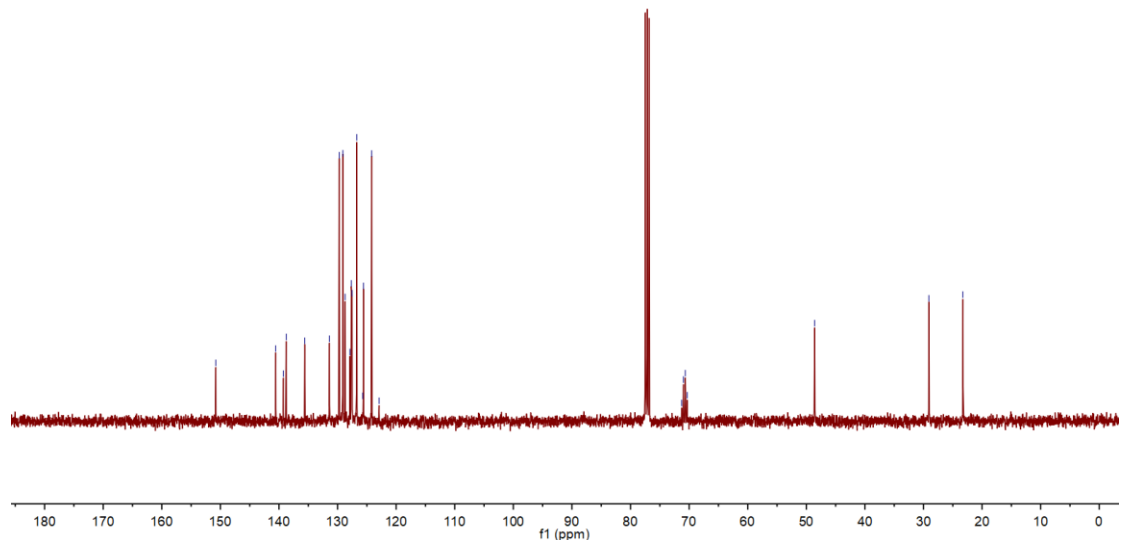

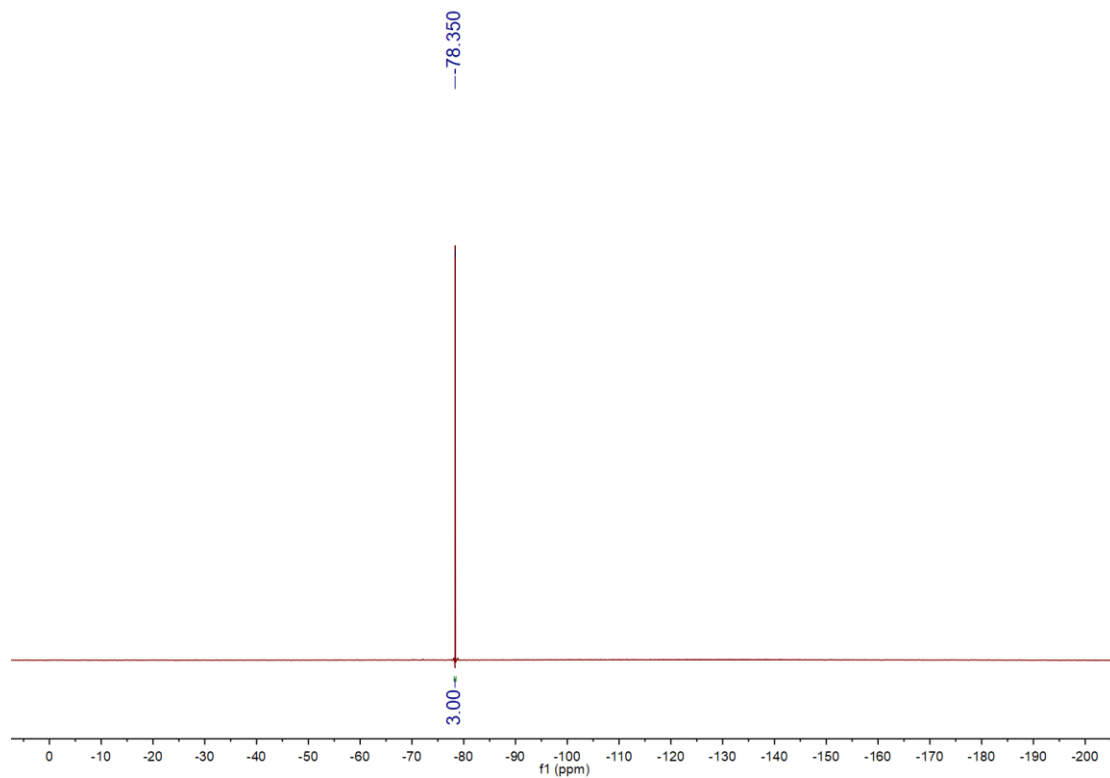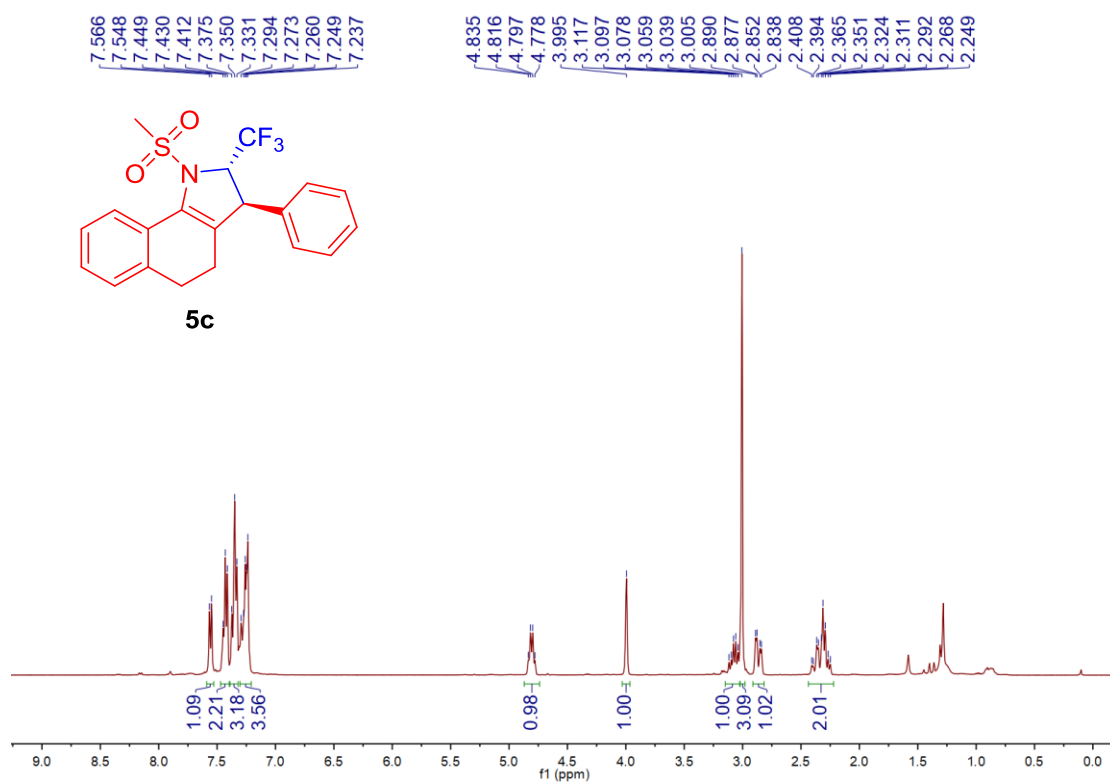

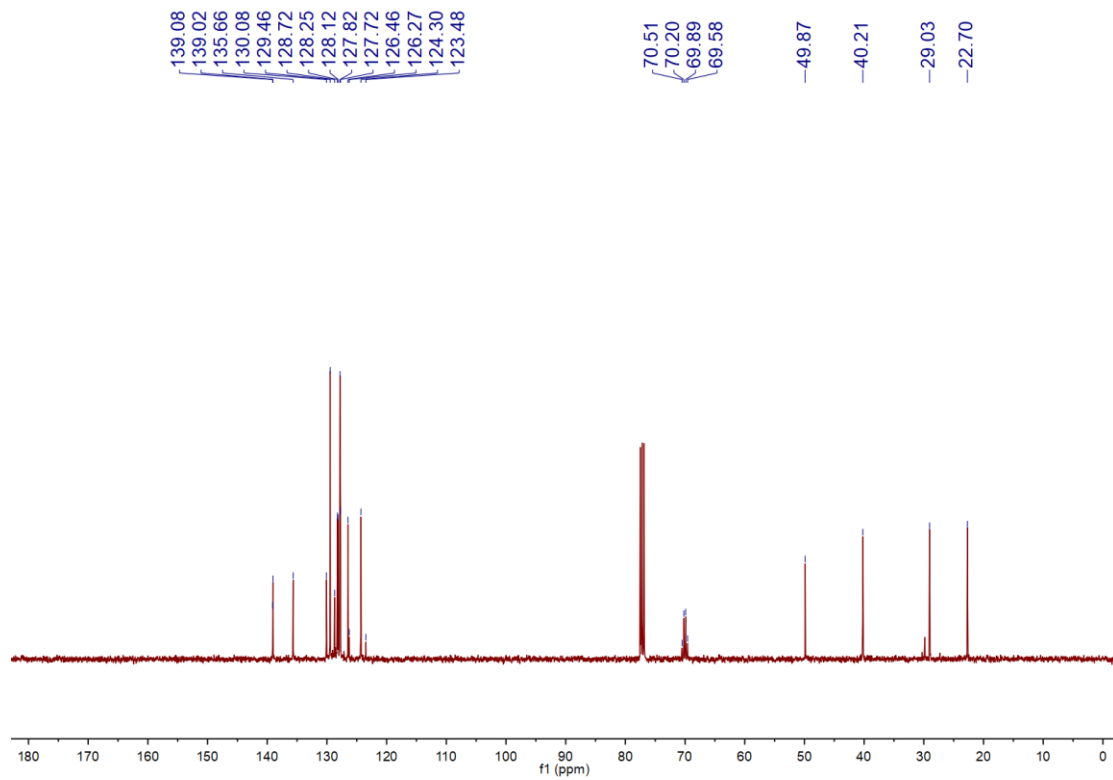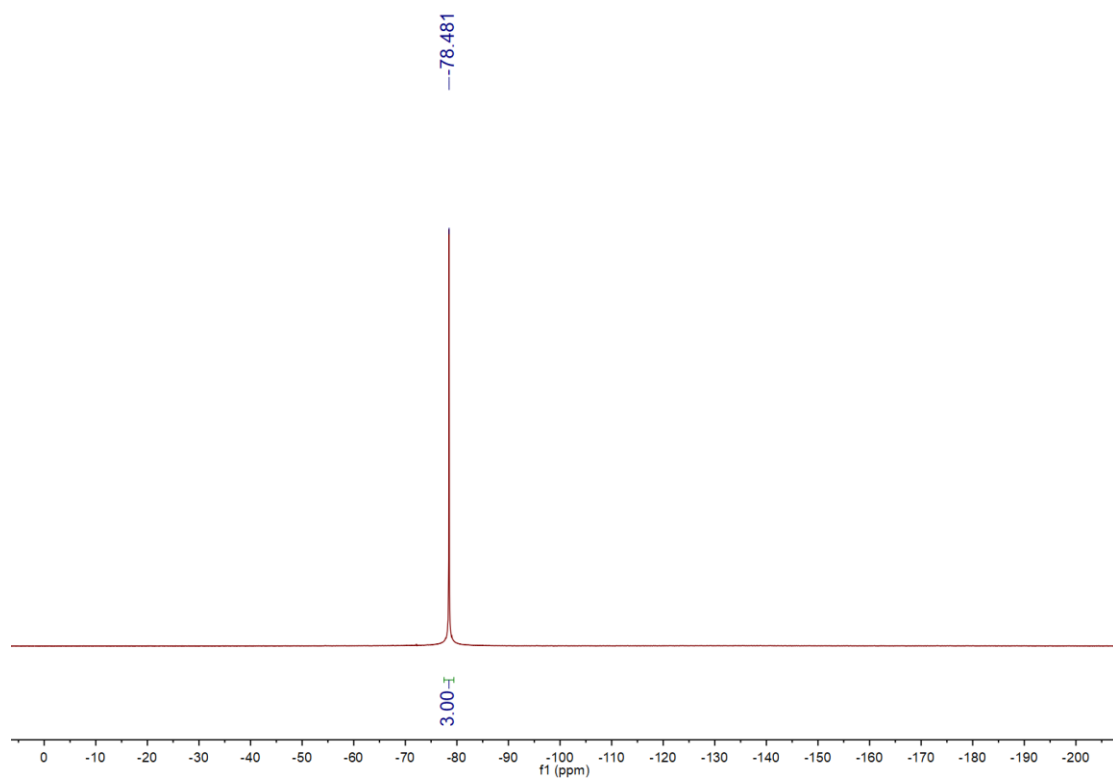

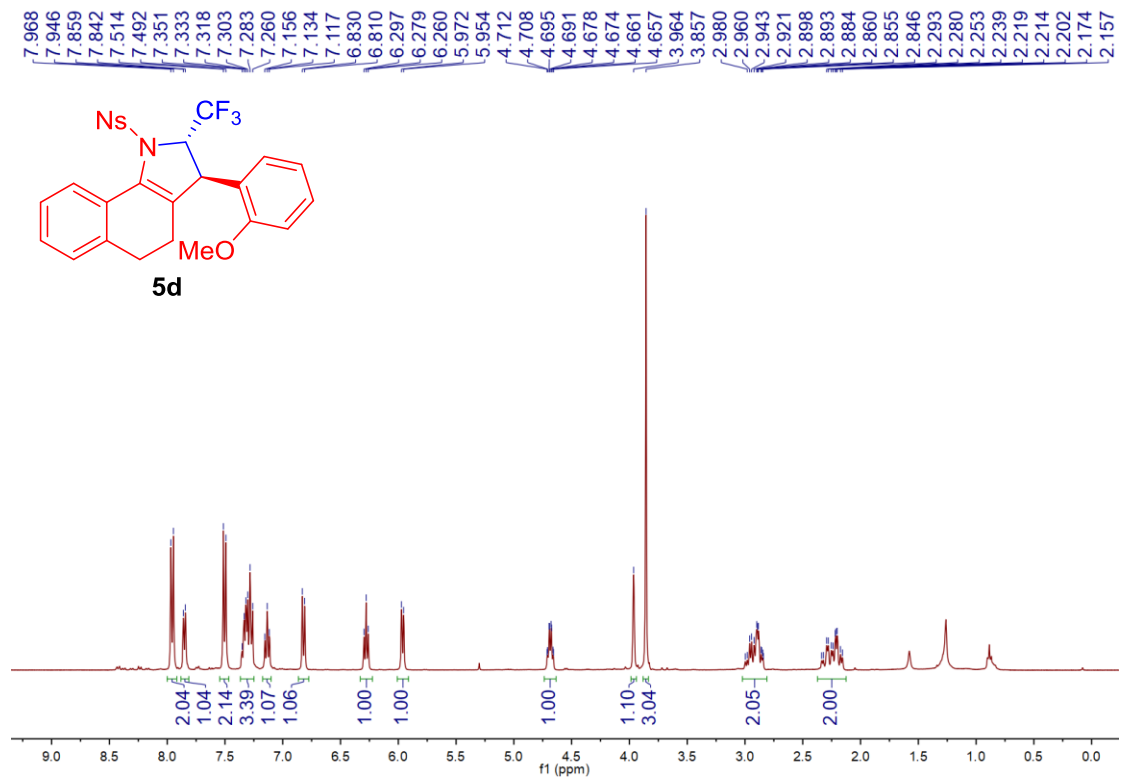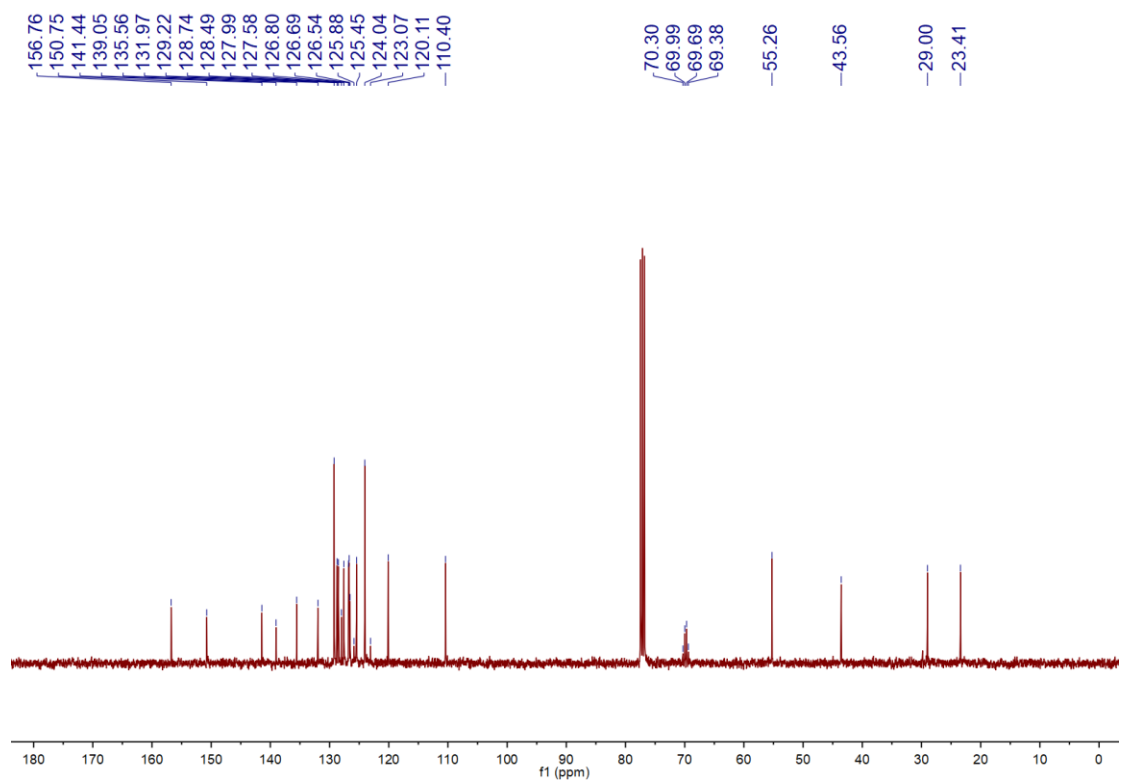

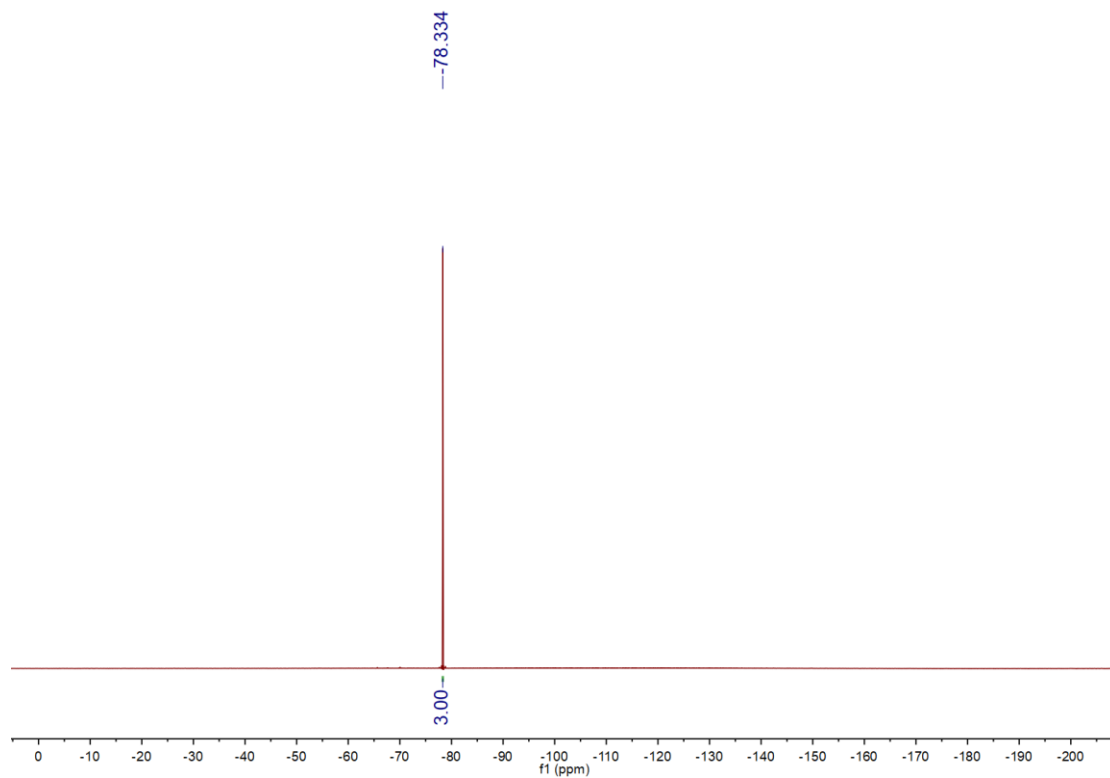

8.217  
8.198  
7.808  
7.789  
7.616  
7.596  
7.431  
7.412  
7.283  
7.263  
7.260  
7.237  
7.217  
7.199  
7.120  
7.101  
7.082  
6.897  
6.878  
6.860  
6.507  
6.488  
4.877  
4.860  
4.843  
4.273  
2.966  
2.952  
2.931  
2.914  
2.891  
2.875  
2.858  
2.843  
2.821  
2.806  
2.368  
2.353  
2.325  
2.310  
2.284  
2.269  
2.075  
2.059  
2.032  
2.015

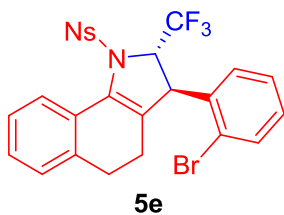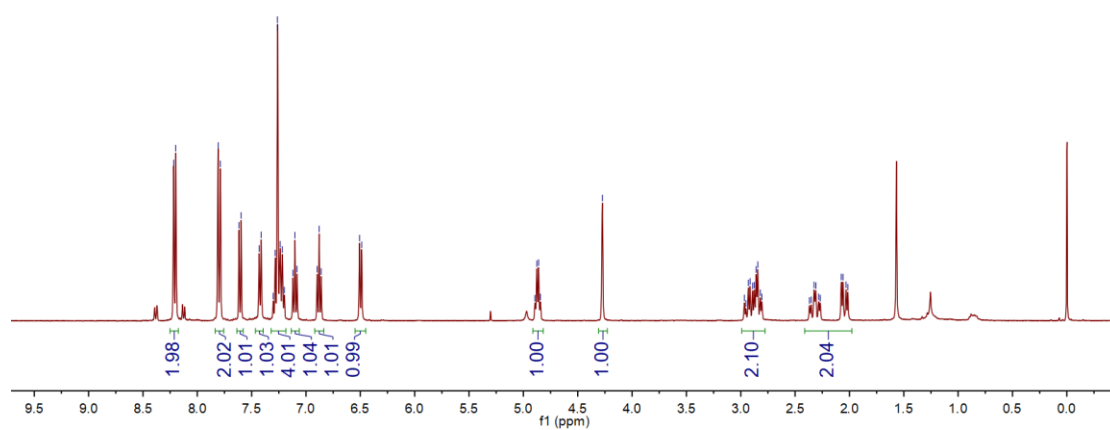

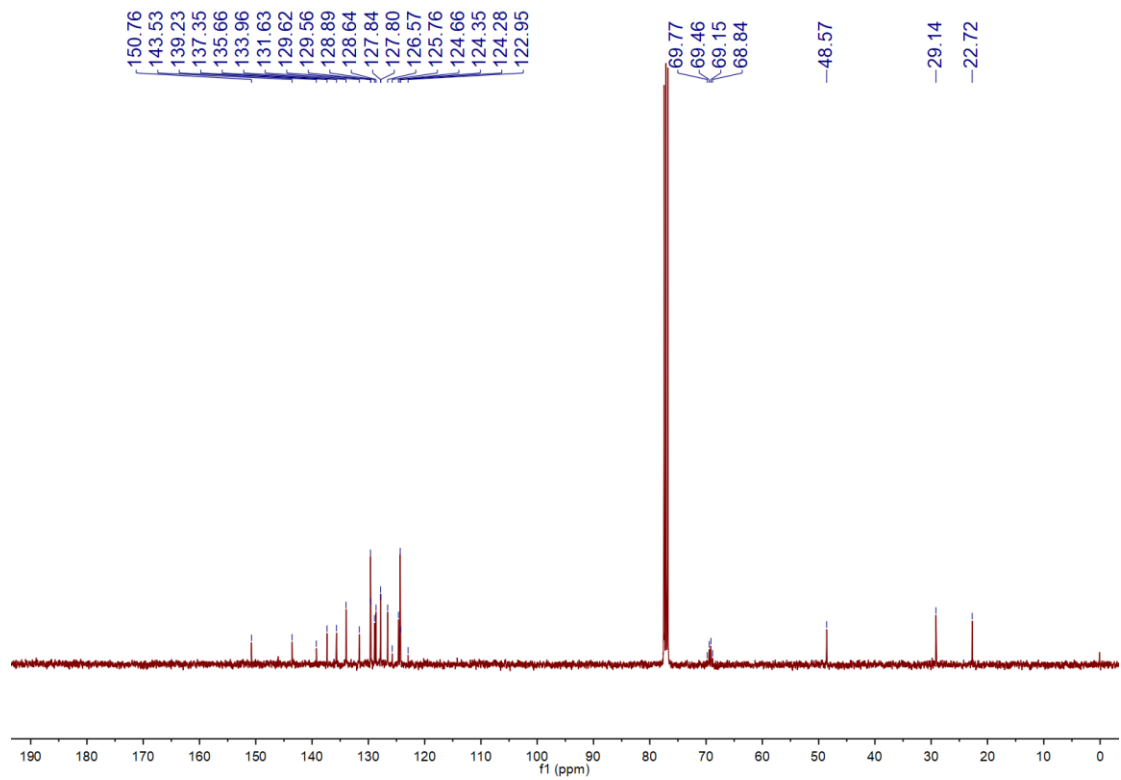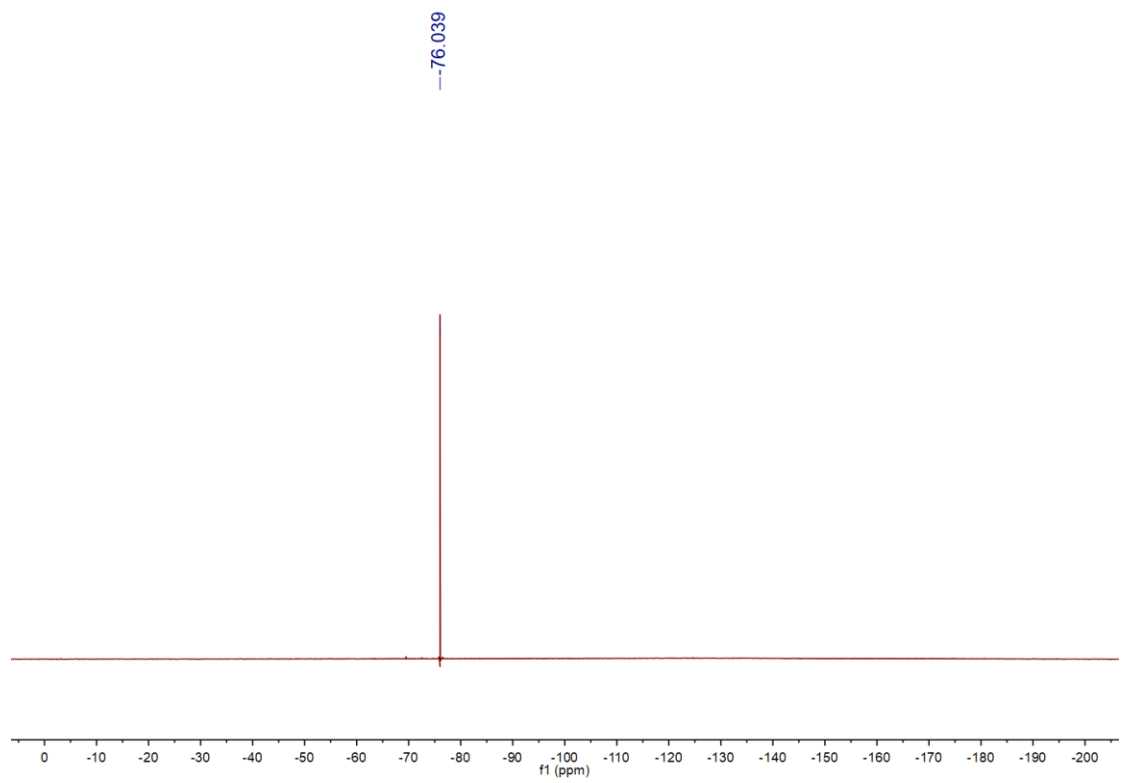

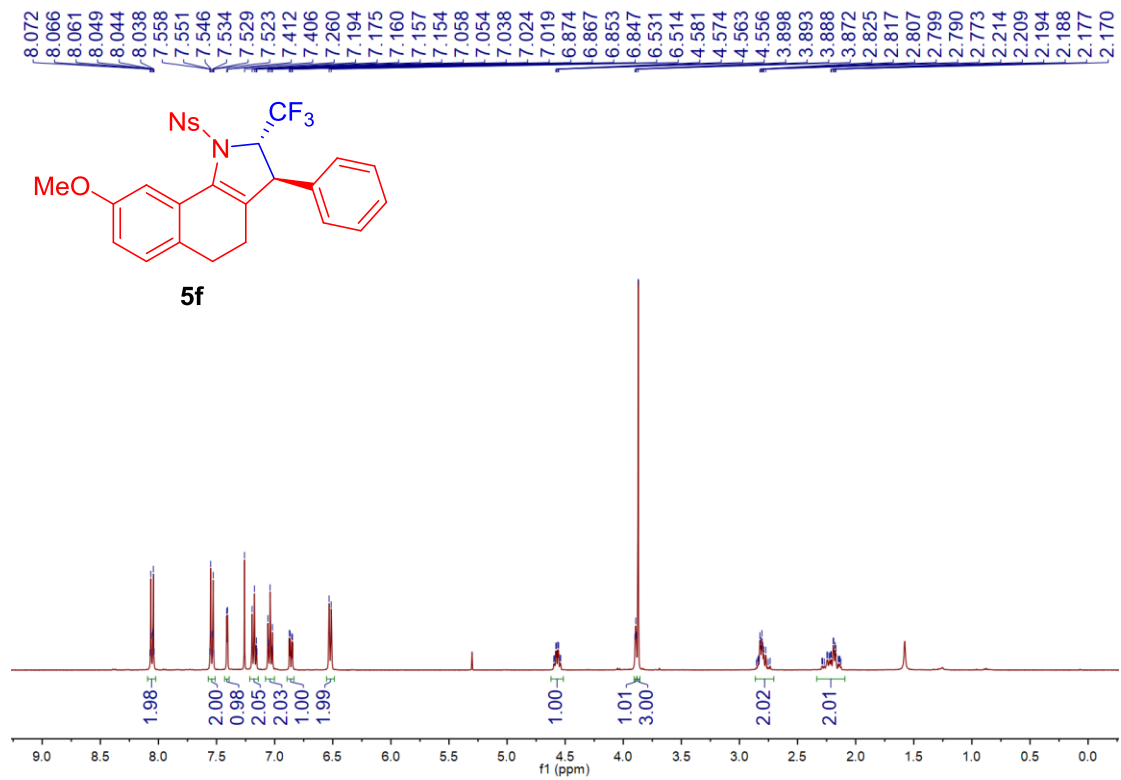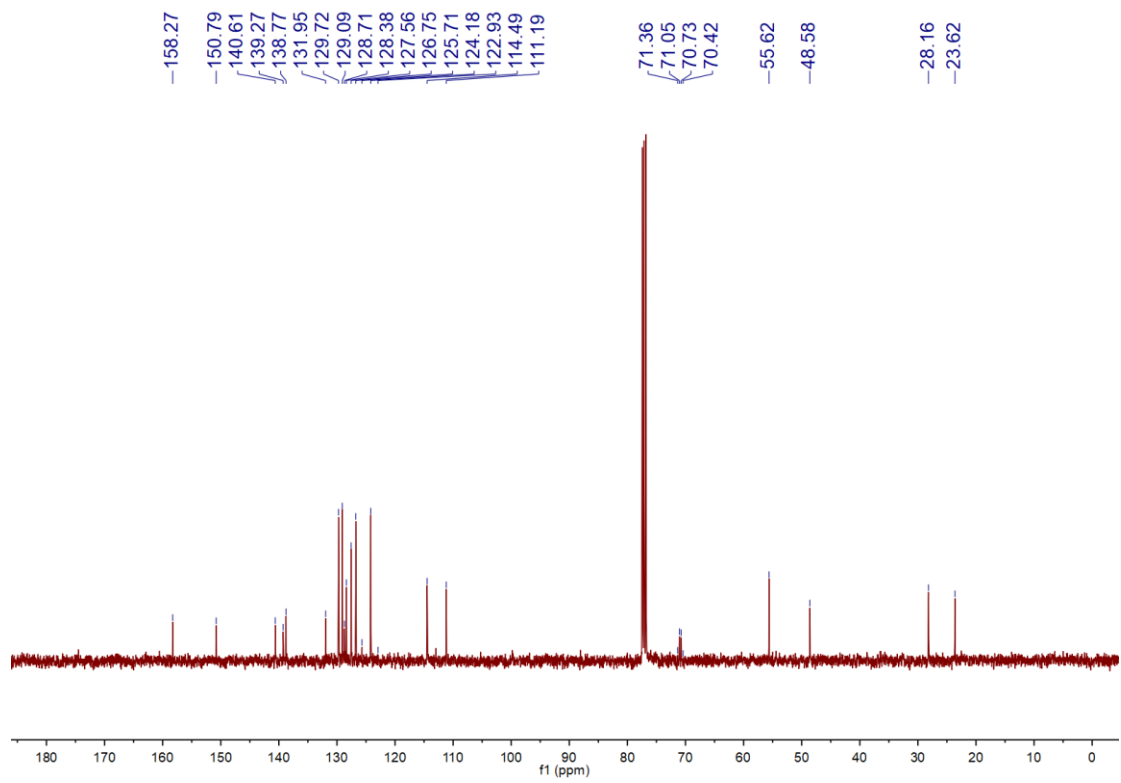

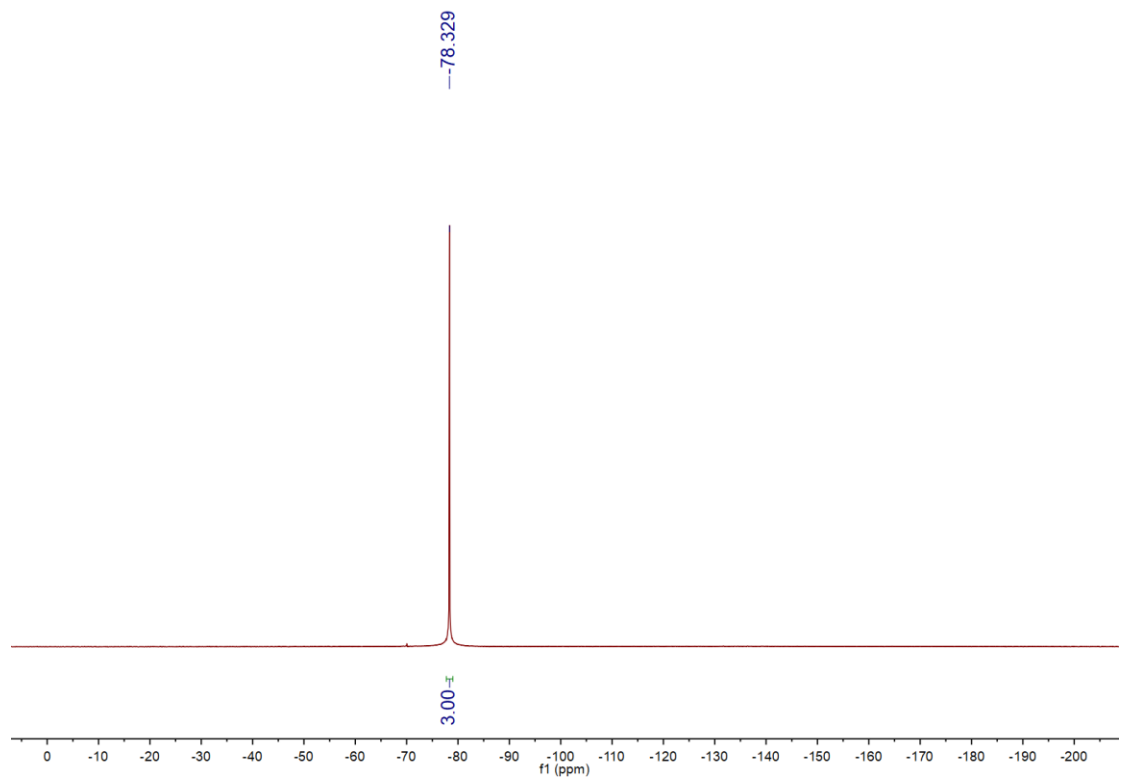

- 8.048
- 8.026
- 7.814
- 7.793
- 7.532
- 7.511
- 7.260
- 7.182
- 7.163
- 7.145
- 7.045
- 7.027
- 7.008
- 6.862
- 6.844
- 6.522
- 6.503
- 4.569
- 4.563
- 4.551
- 4.545
- 4.534
- 4.528
- 4.516
- 4.510
- 3.869
- 2.922
- 2.887
- 2.870
- 2.849
- 2.837
- 2.832
- 2.816
- 2.810
- 2.301
- 2.284
- 2.258
- 2.242
- 2.220
- 2.205
- 2.186
- 2.179
- 2.171
- 2.164
- 2.142
- 2.137
- 2.125

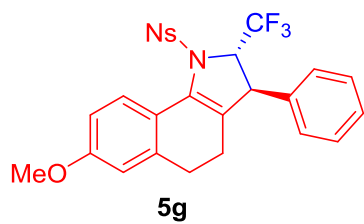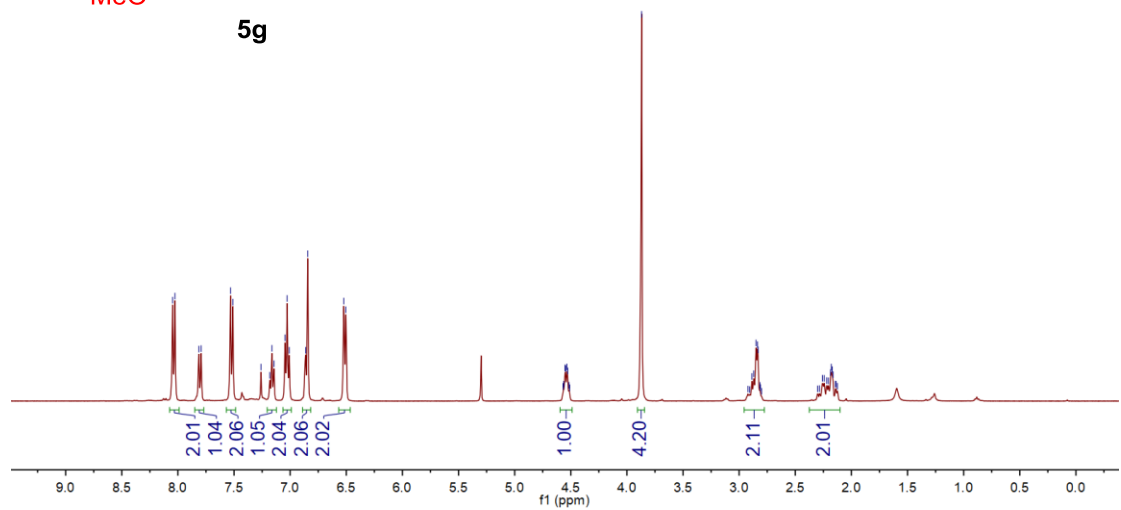



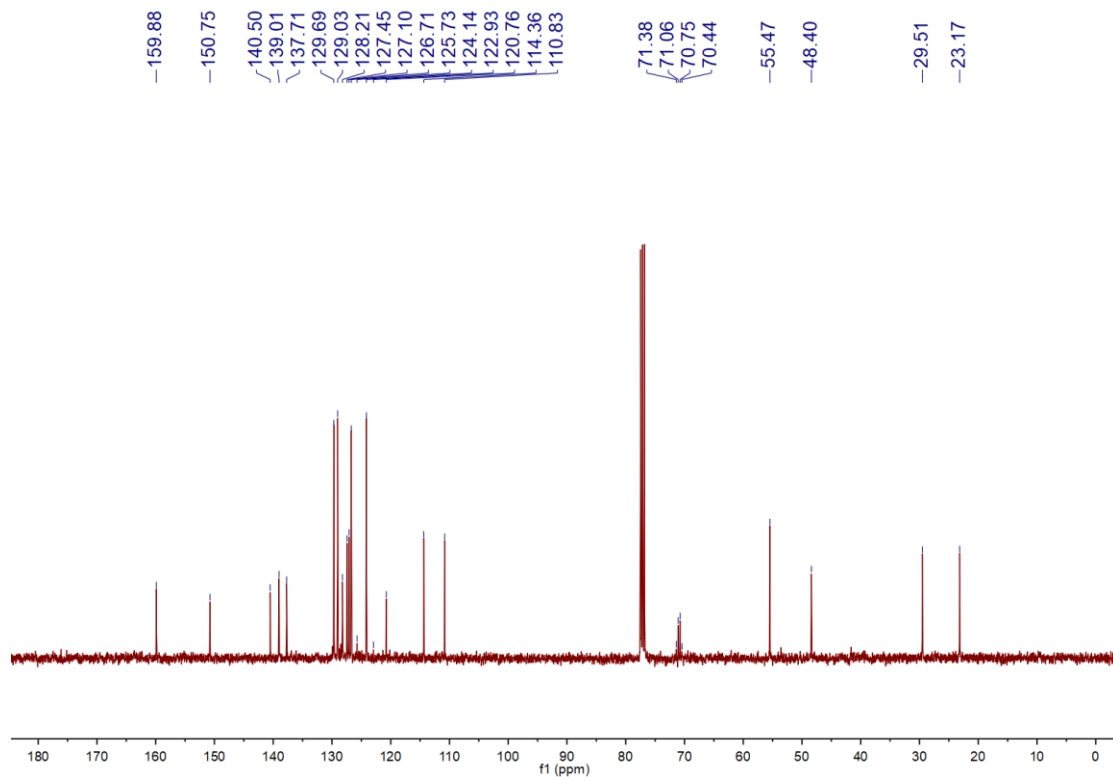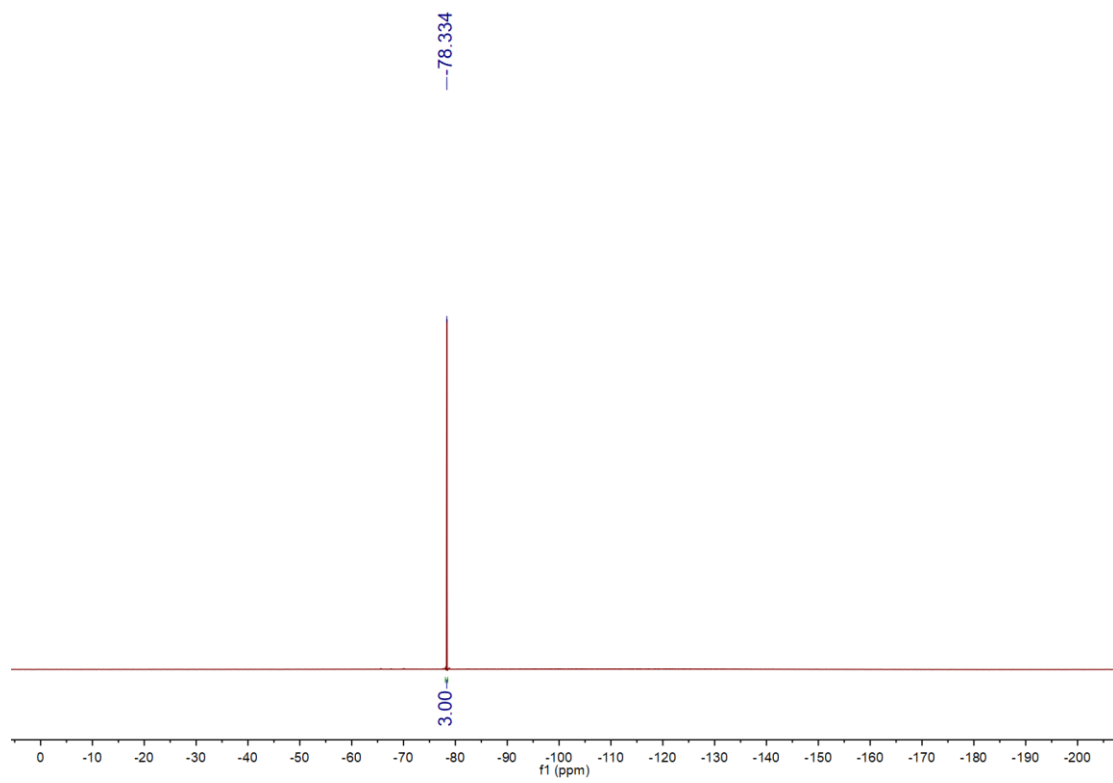

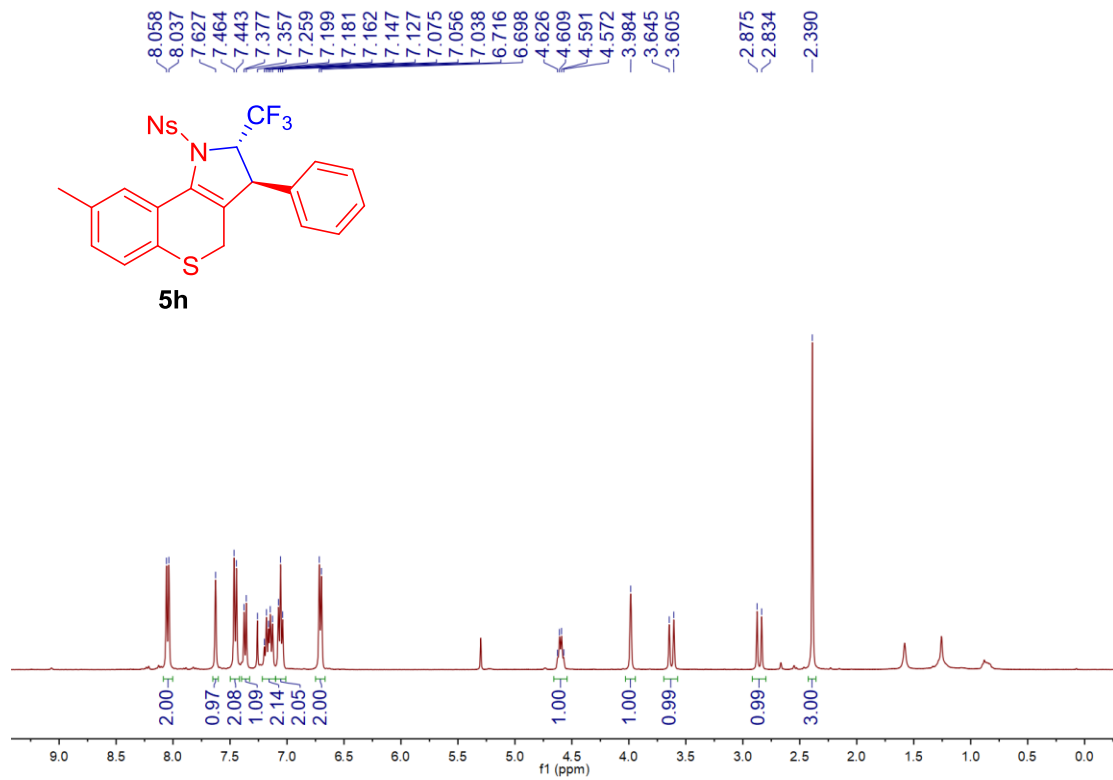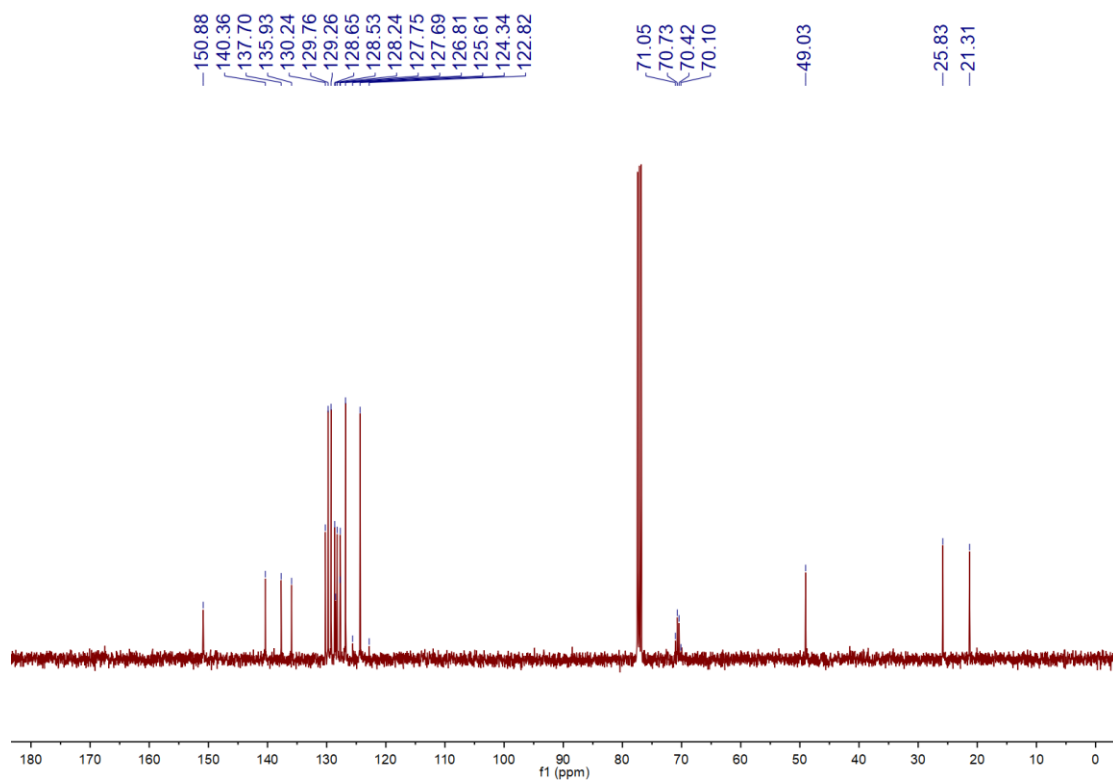

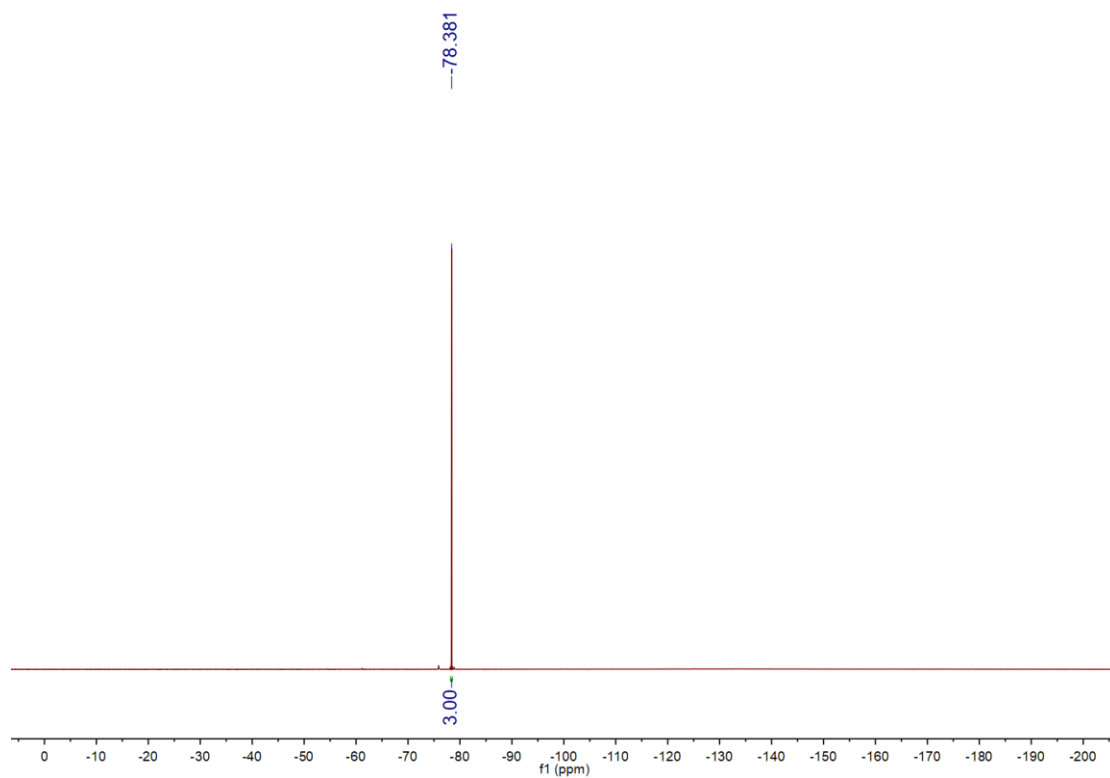

8.067  
8.046  
7.667  
7.580  
7.565  
7.546  
7.427  
7.406  
7.260  
6.997  
6.988  
6.981  
6.902  
6.892  
6.880

3.826  
3.784  
3.282  
3.266  
2.957  
2.915  
2.299  
2.281  
2.263

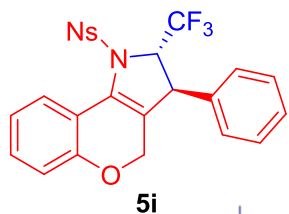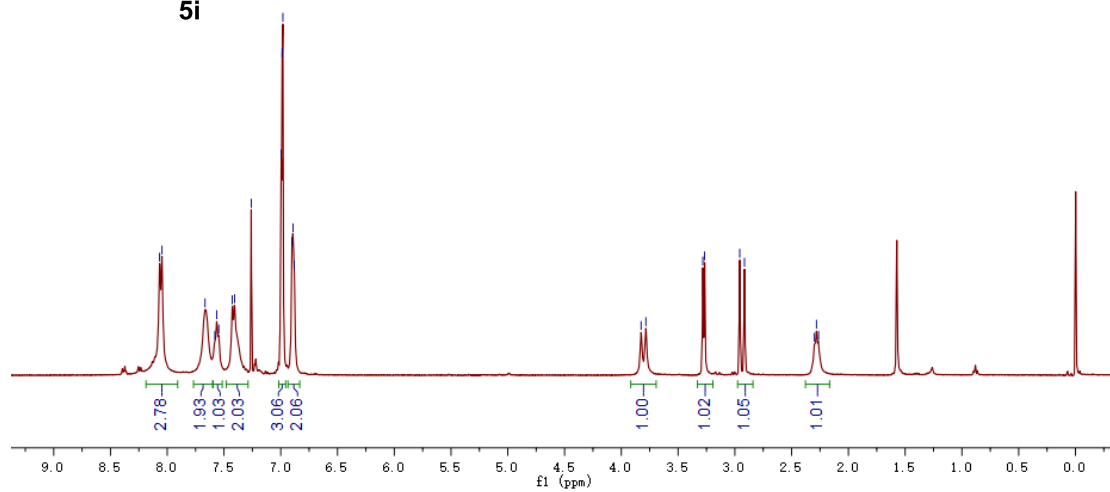

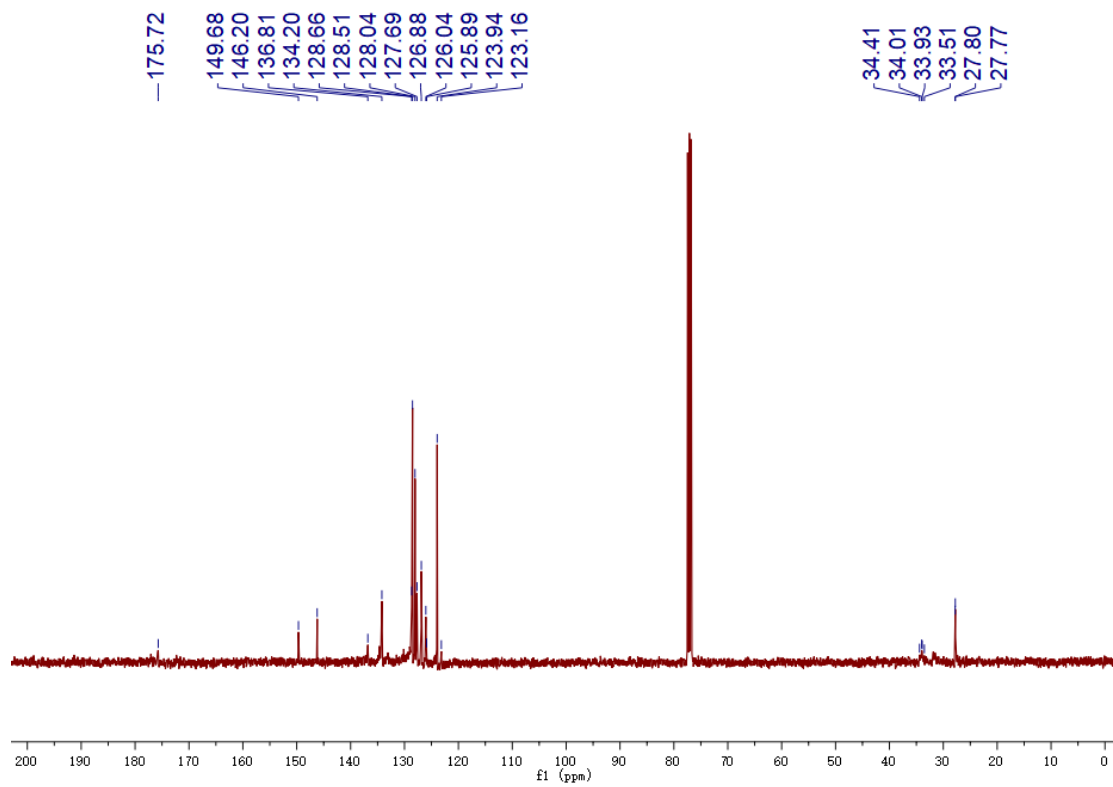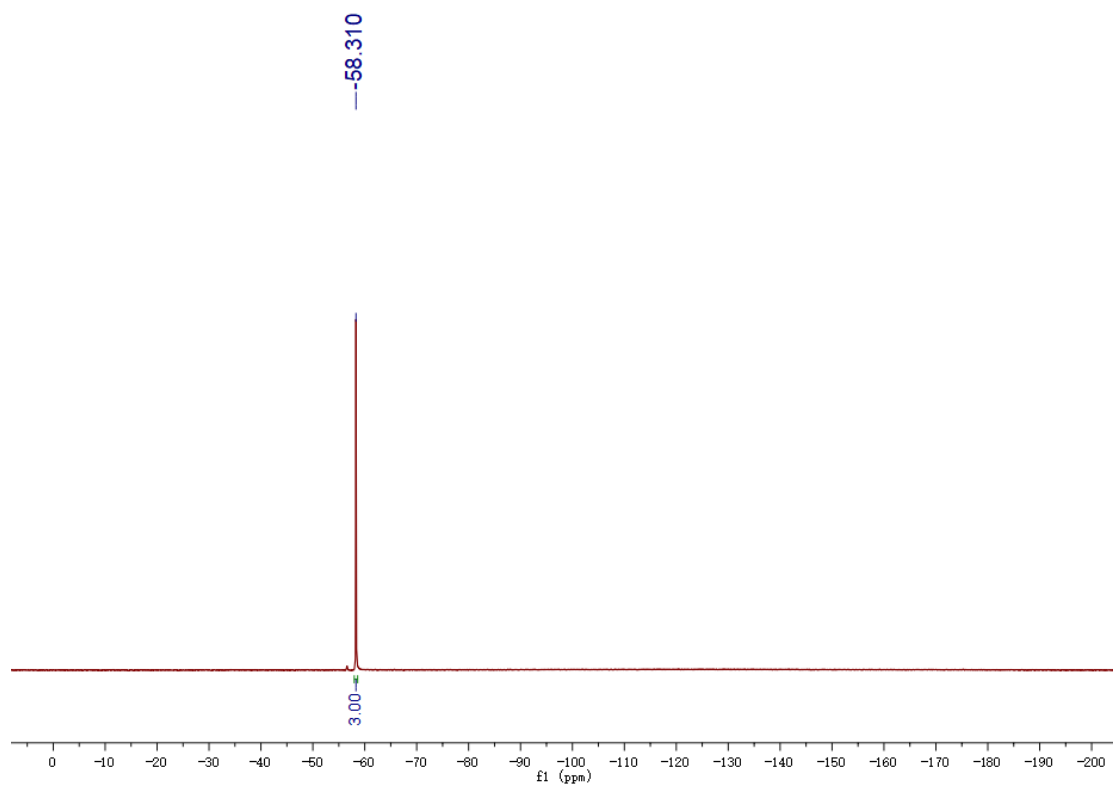

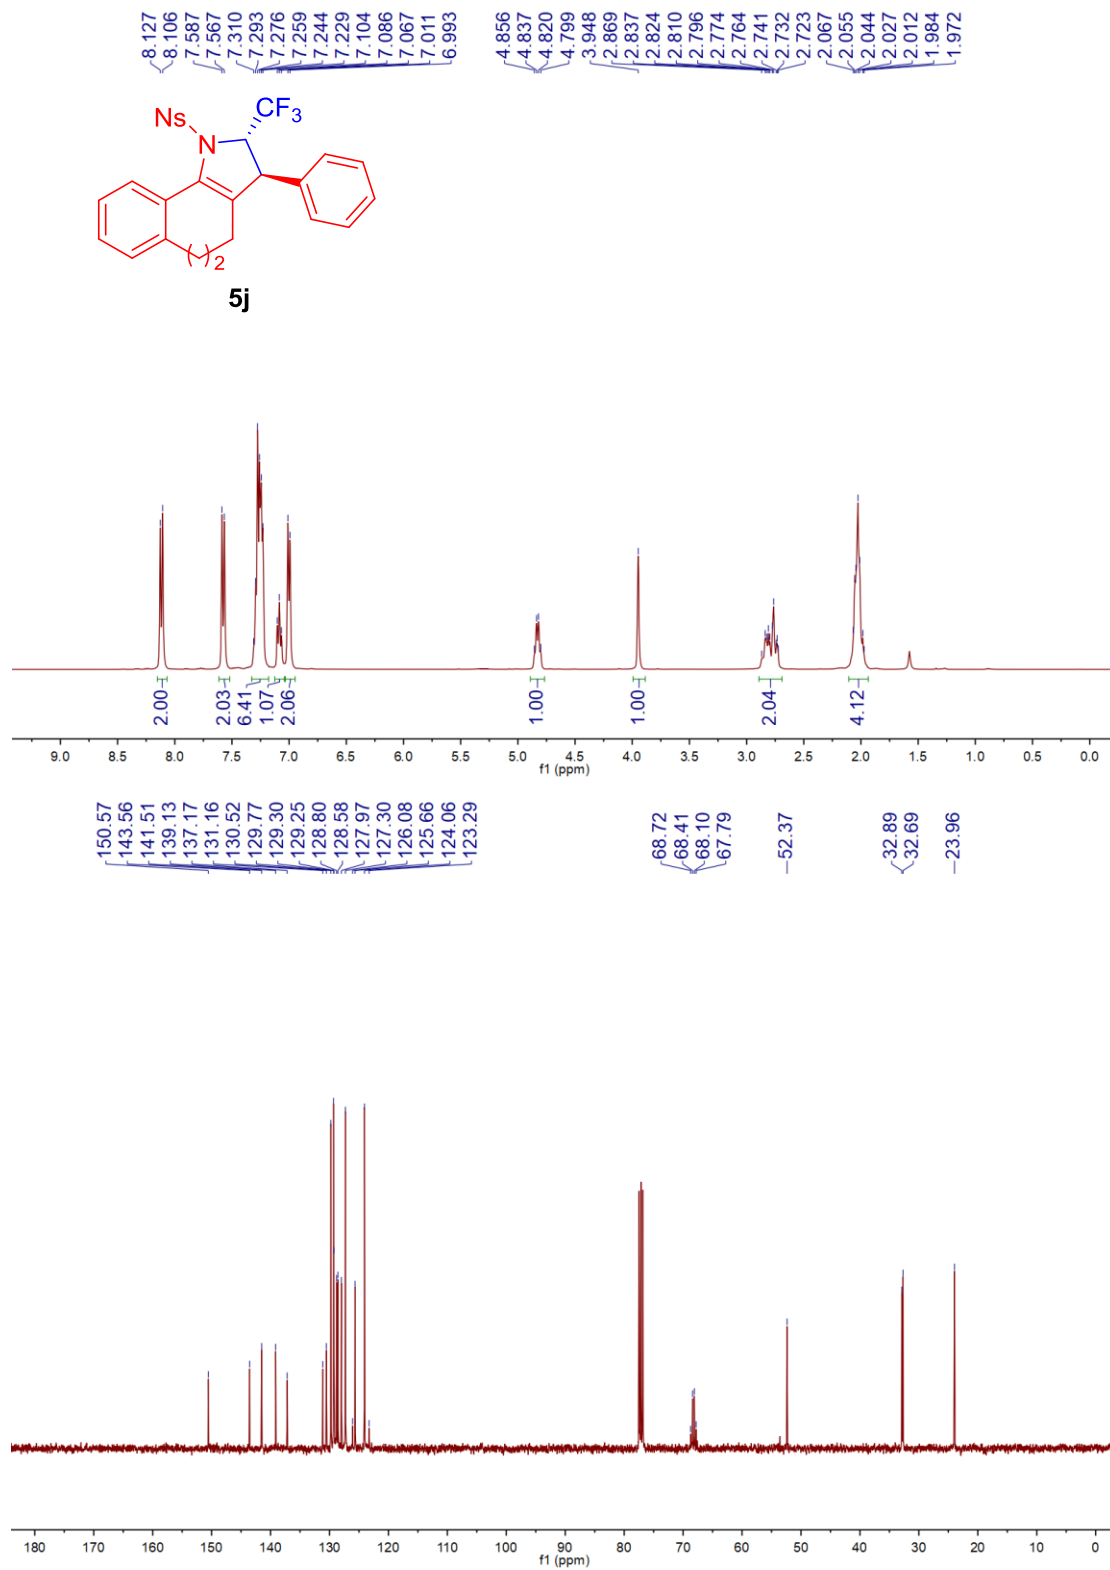

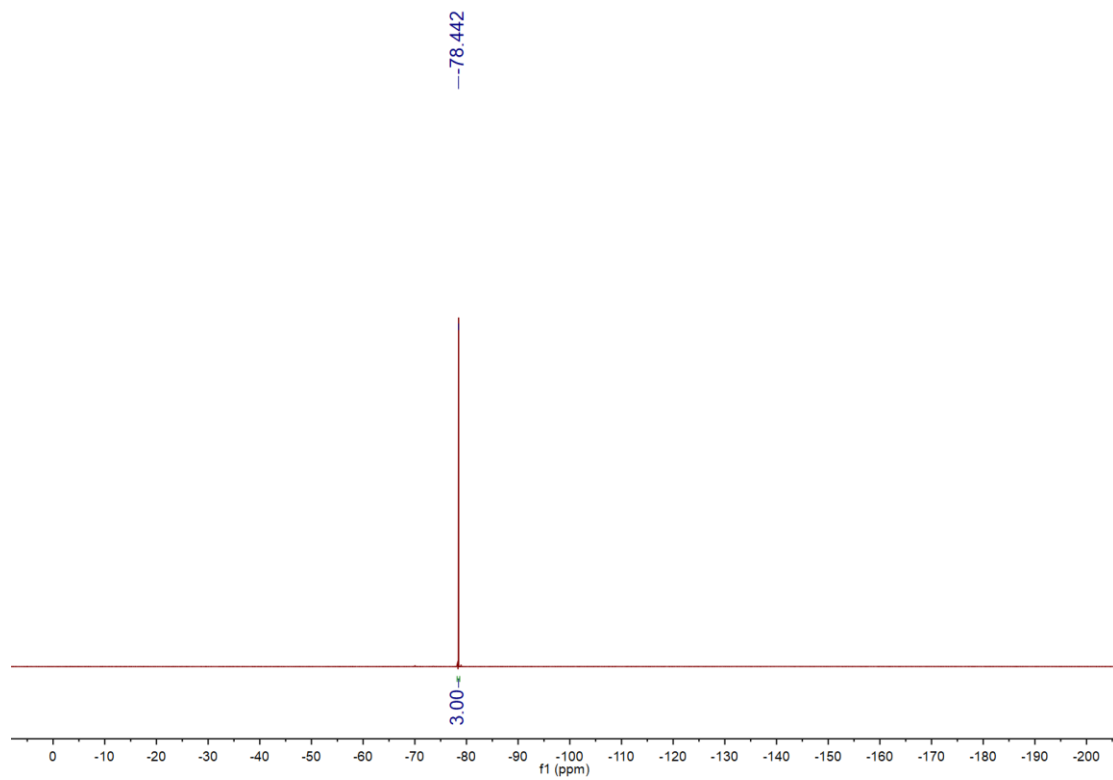

8.119  
8.097  
7.582  
7.560  
7.292  
7.279  
7.273  
7.260  
7.239  
7.121  
7.116  
7.103  
7.098  
7.085  
7.080  
7.044  
7.024  
6.870  
6.851  
4.806  
4.794  
4.788  
4.776  
4.770  
4.757  
4.751  
3.908  
2.834  
2.829  
2.821  
2.815  
2.800  
2.786  
2.772  
2.762  
2.754  
2.740  
2.733  
2.727  
2.348  
2.081  
2.073  
2.060  
2.054  
2.047  
2.040  
2.033  
2.022  
2.008  
1.996  
1.981

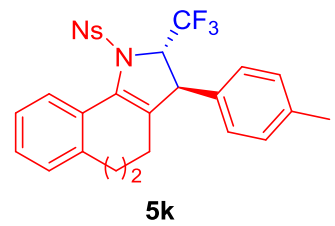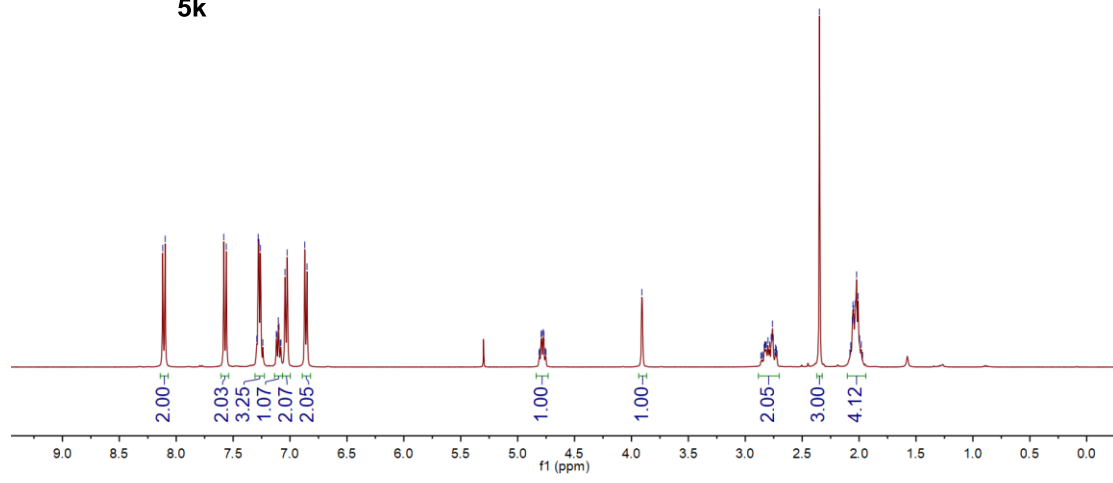

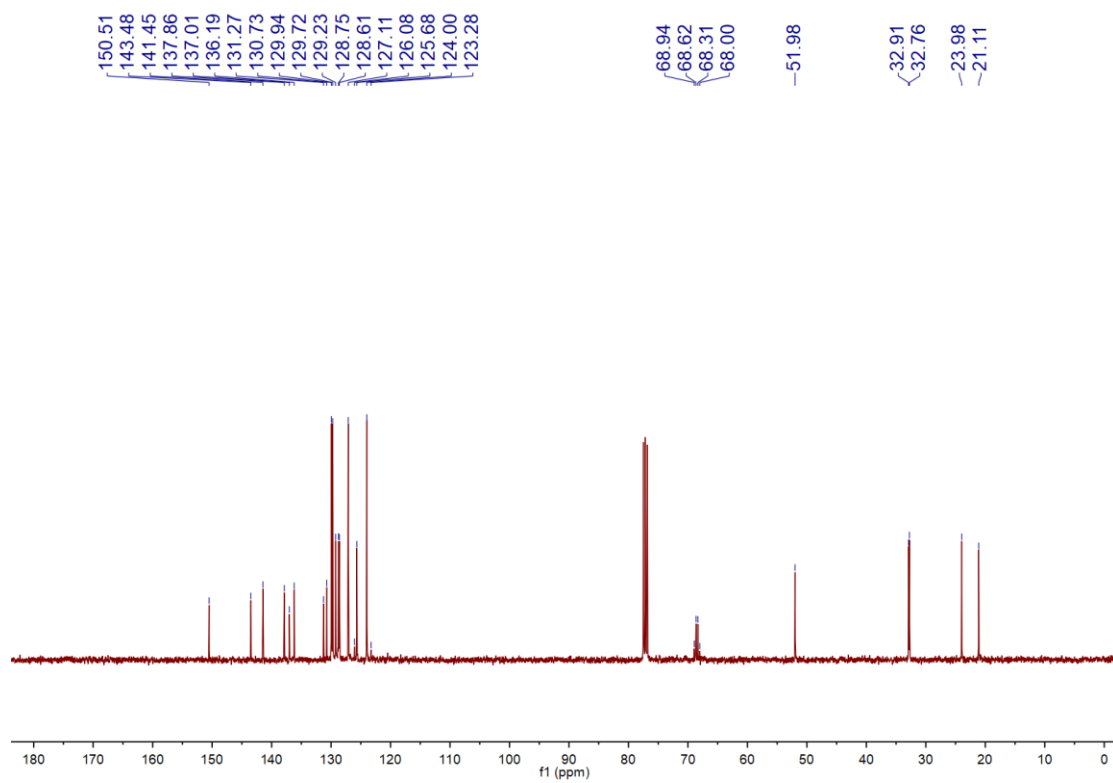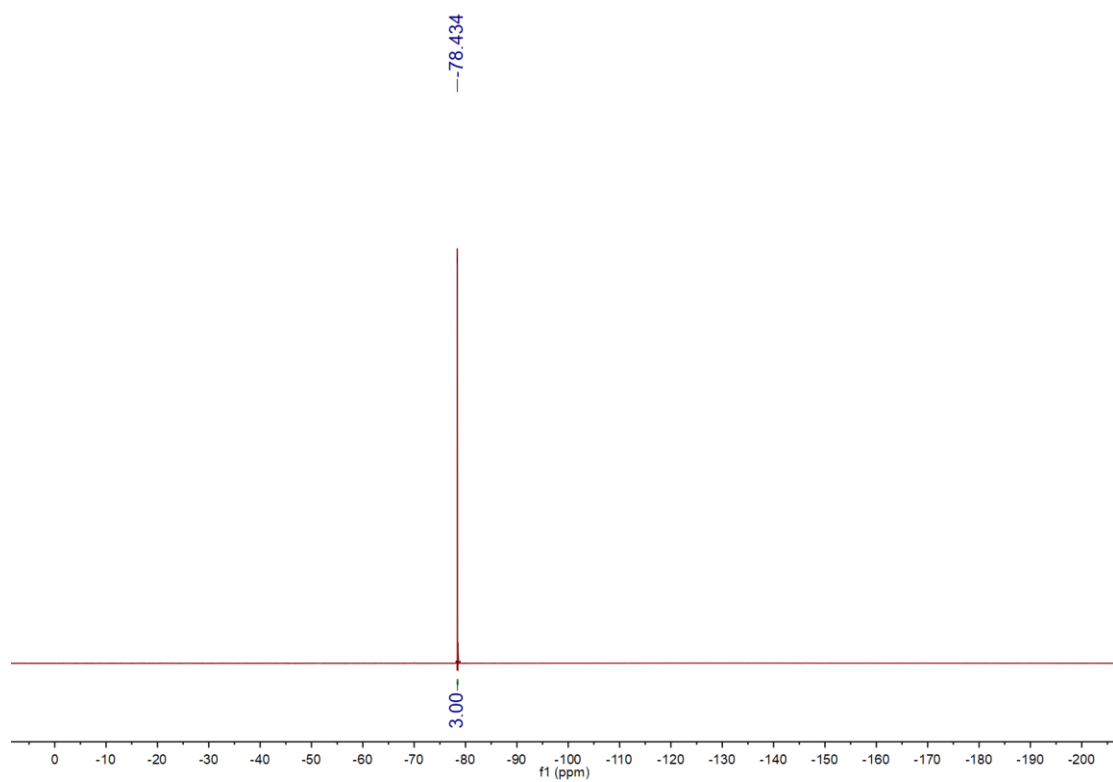

8.191  
8.169  
7.639  
7.617  
7.312  
7.292  
7.278  
7.259  
7.245  
7.240  
7.229  
7.224  
7.205  
7.118  
7.098  
6.988  
6.969  
6.952  
6.933  
4.934  
4.929  
4.916  
4.911  
4.898  
4.892  
4.879  
4.874  
3.921  
2.898  
2.882  
2.870  
2.855  
2.839  
2.822  
2.765  
2.754  
2.730  
2.721  
2.712  
2.068  
2.051  
2.027  
2.011  
2.000  
1.982  
1.954  
1.943

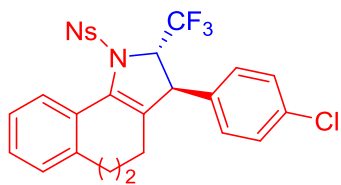

**5I**

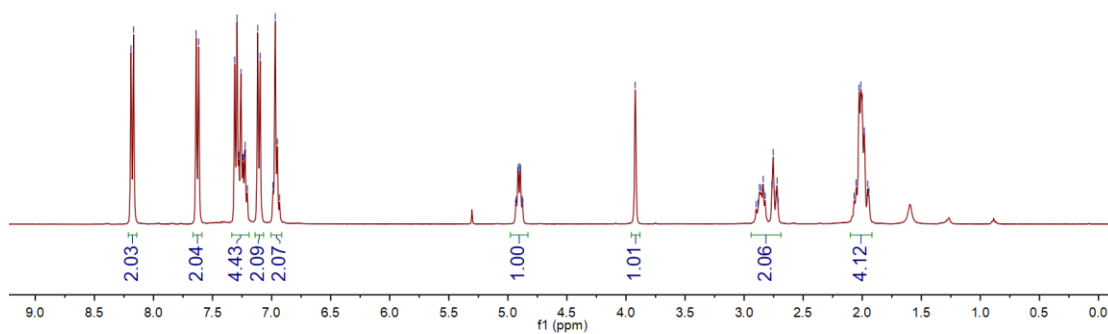

150.56  
144.23  
141.74  
137.54  
137.31  
134.22  
130.83  
130.32  
129.85  
129.58  
129.30  
128.87  
128.14  
126.07  
125.54  
124.00  
123.28

67.98  
67.66  
67.34  
67.03  
52.03  
32.80  
32.52  
23.84

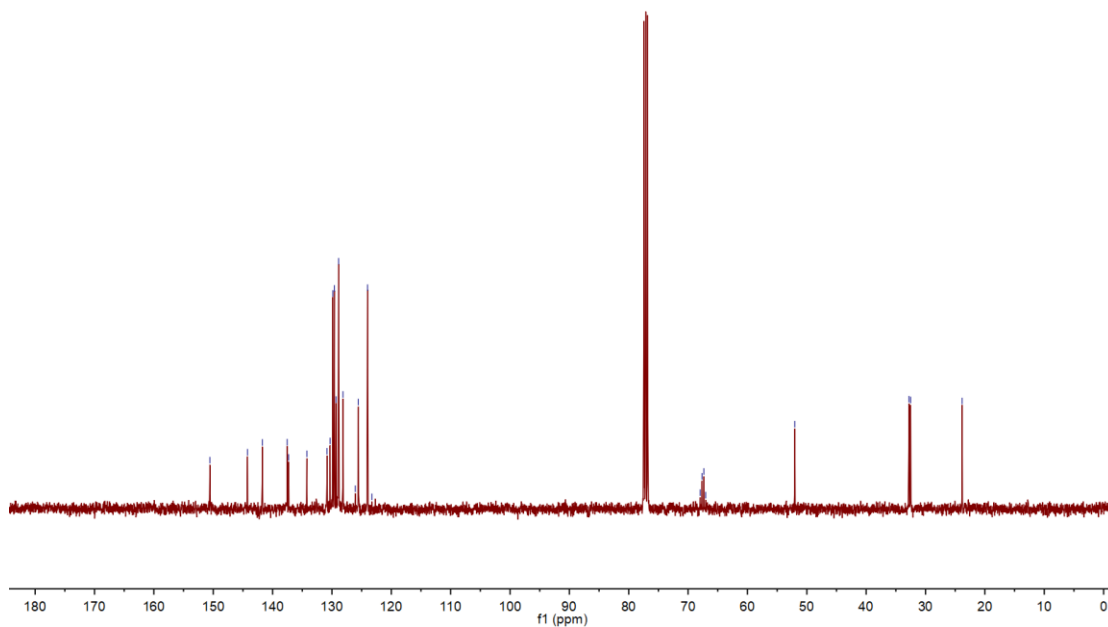



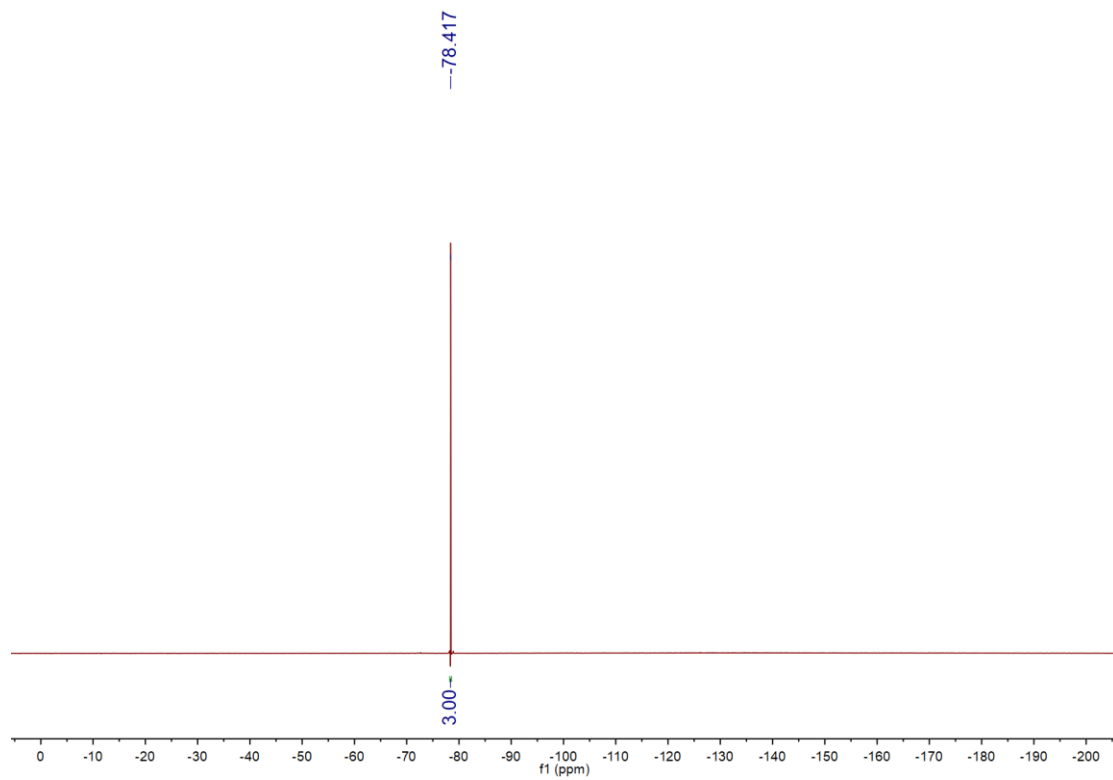

9.652  
7.564  
7.560  
7.555  
7.543  
7.542  
7.540  
7.535  
7.505  
7.486  
7.466  
7.409  
7.405  
7.401  
7.392  
7.386  
7.375  
7.367  
7.358  
7.353  
7.289  
7.285  
7.277  
7.272  
7.267  
7.260  
7.255  
7.251  
7.238  
7.234  
7.220  
7.202  
7.198  
2.974  
2.957  
2.951  
2.937  
2.870  
2.856  
2.850  
2.835  
2.831

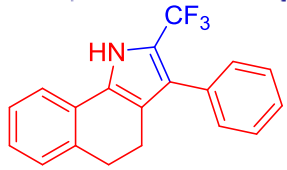

6a

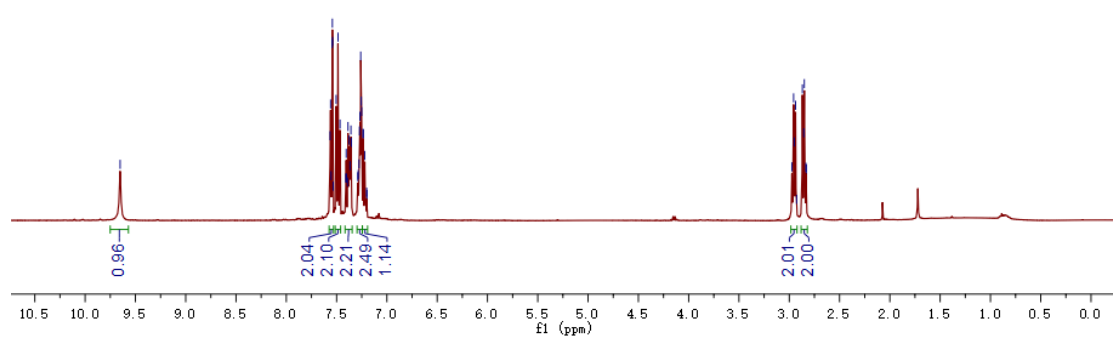

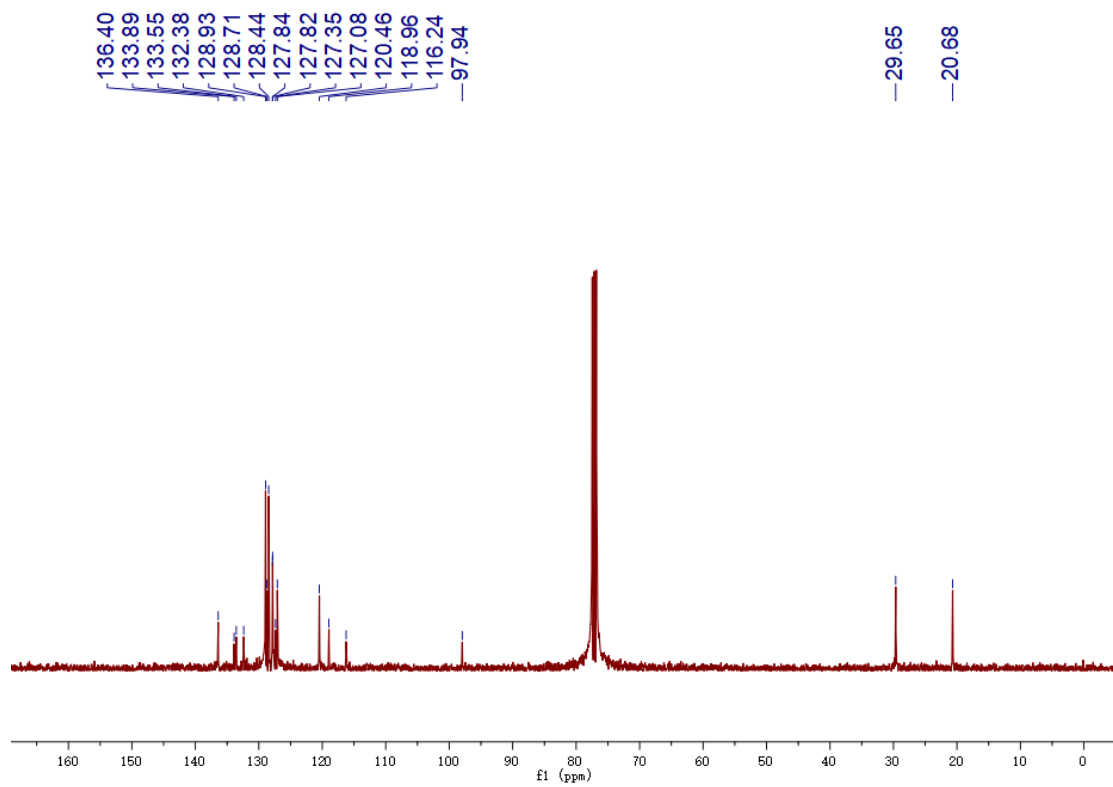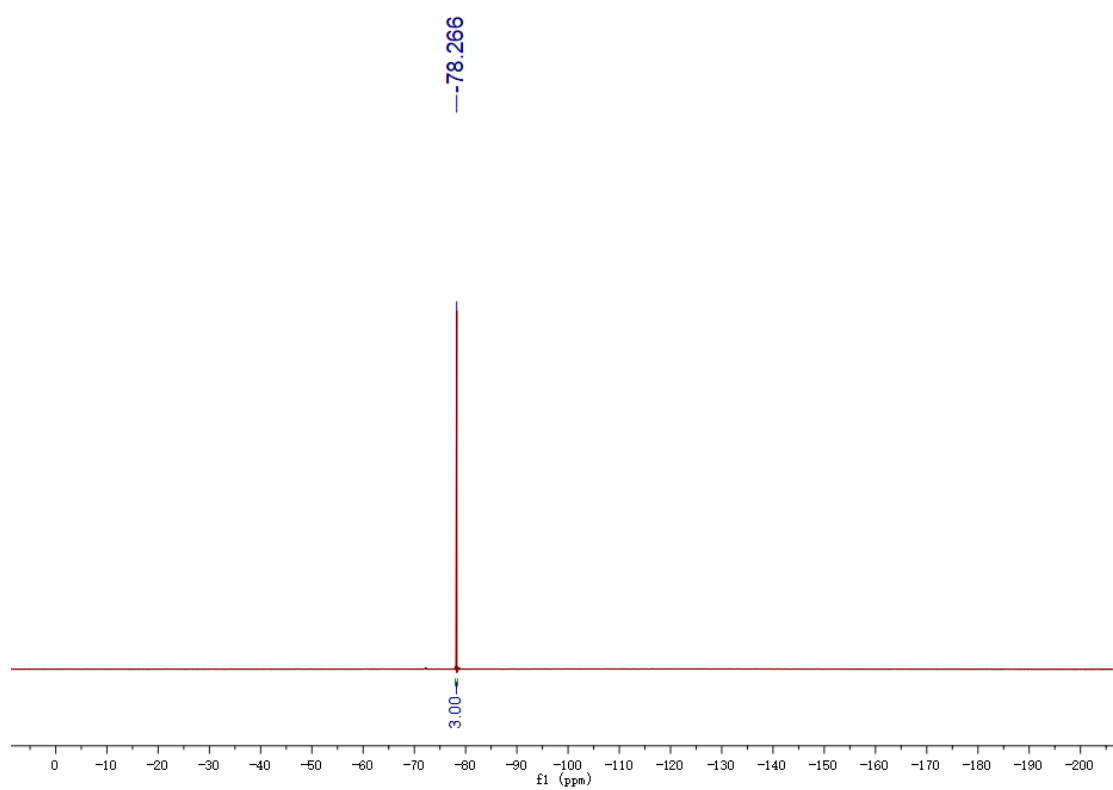

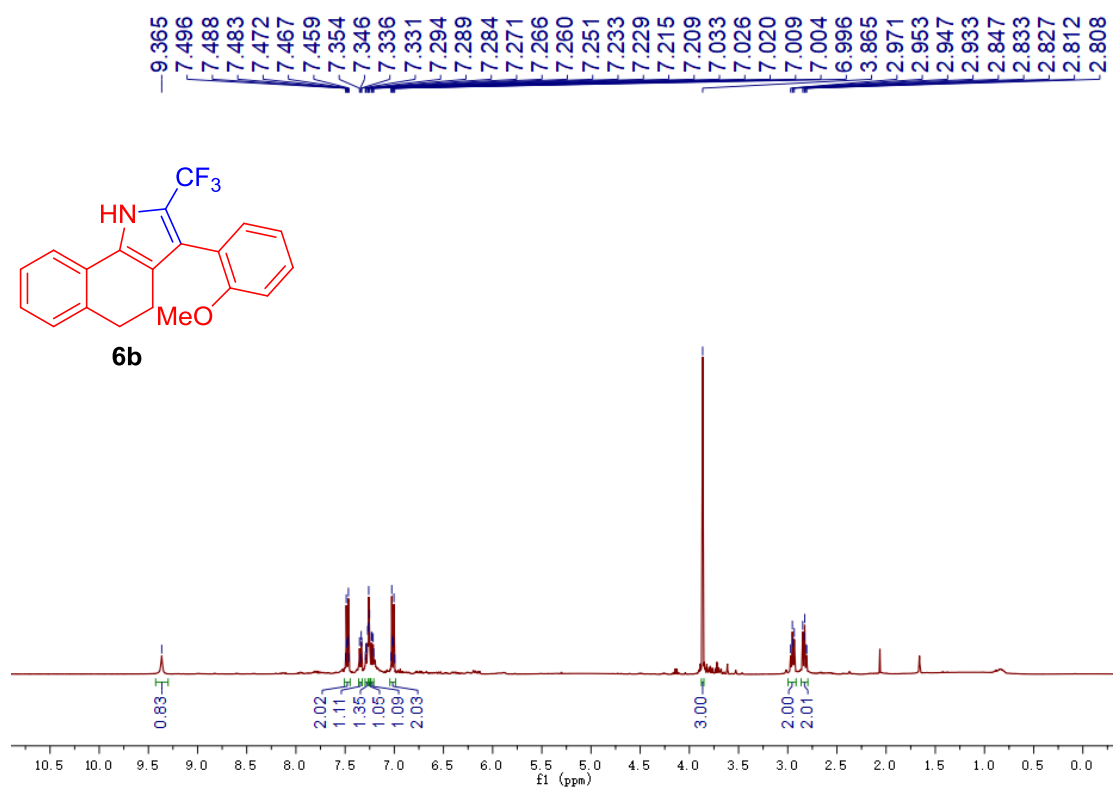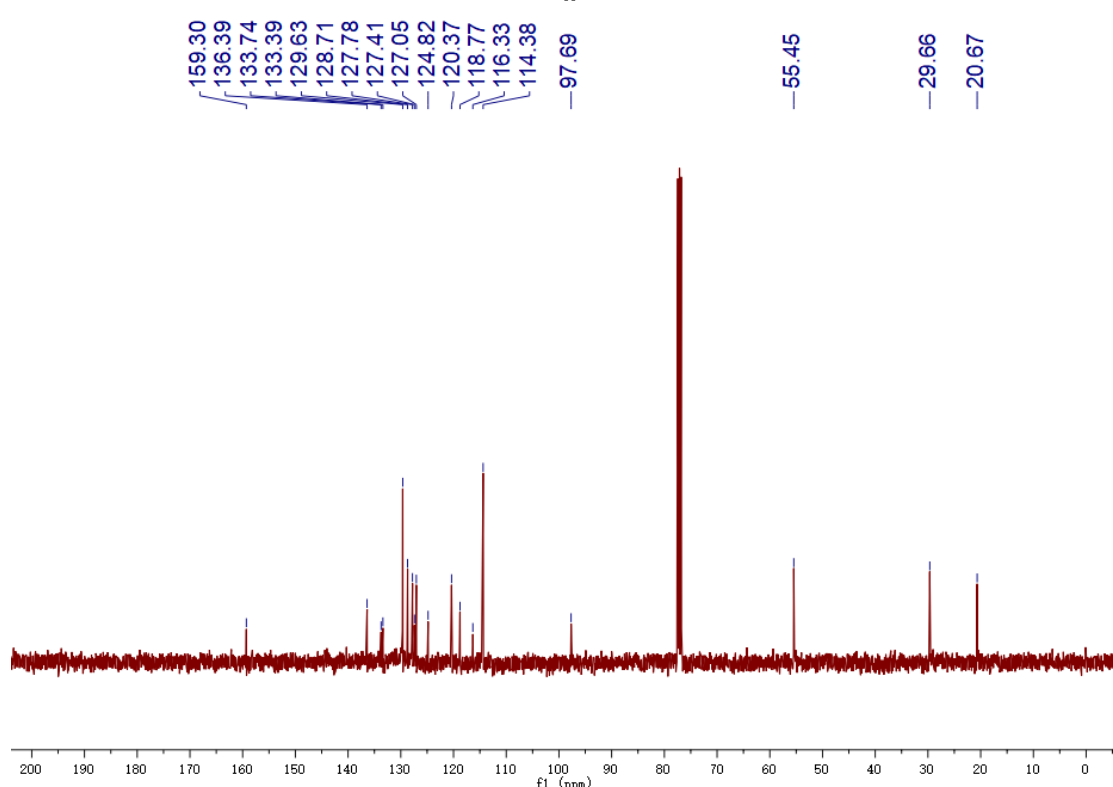

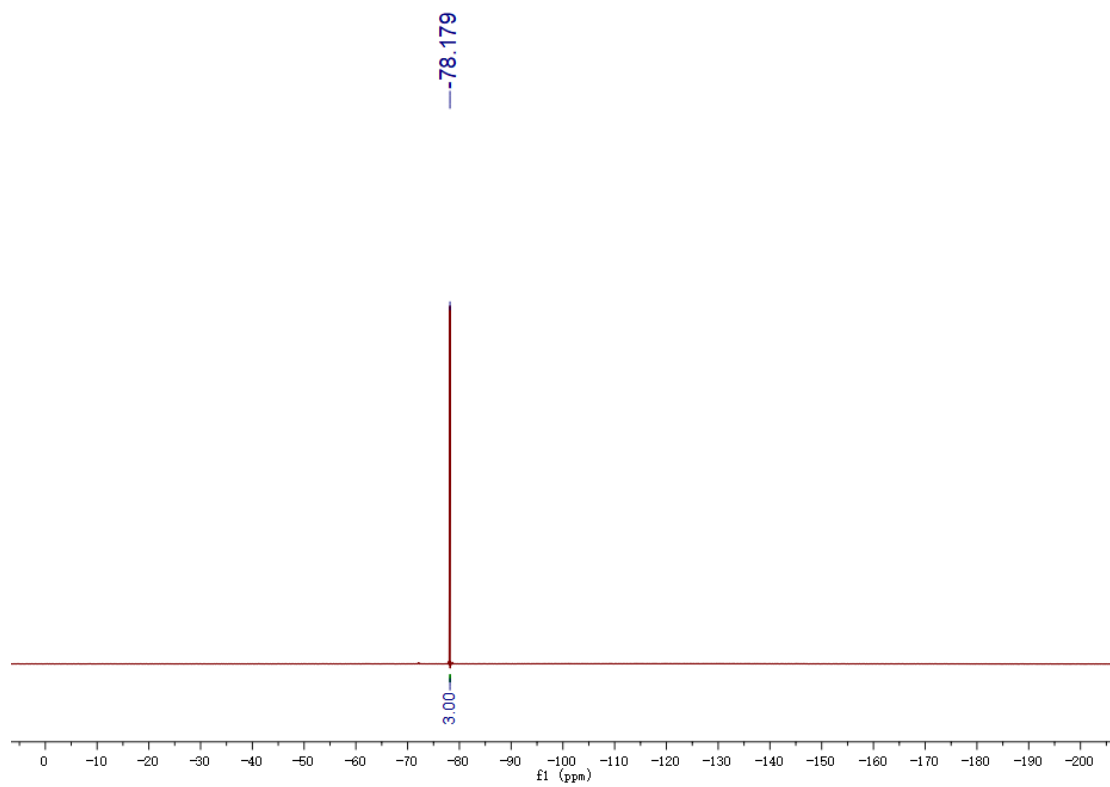

9.786  
8.192  
8.171  
7.938  
7.920  
7.634  
7.632  
7.627  
7.623  
7.619  
7.615  
7.612  
7.610  
7.606  
7.602  
7.600  
7.597  
7.594  
7.589  
7.585  
7.564  
7.561  
7.547  
7.544  
7.541  
7.527  
7.523  
7.518  
7.515  
7.511  
7.506  
7.501  
7.497  
7.493  
7.482  
7.478  
7.439  
7.435  
7.432  
7.423  
7.417  
7.399  
7.260

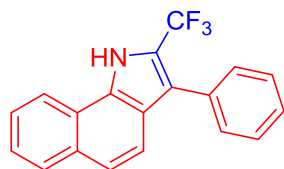

7a

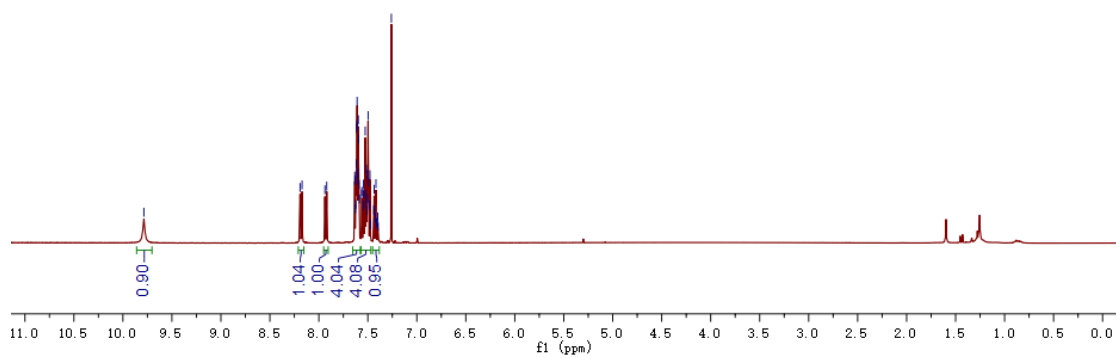

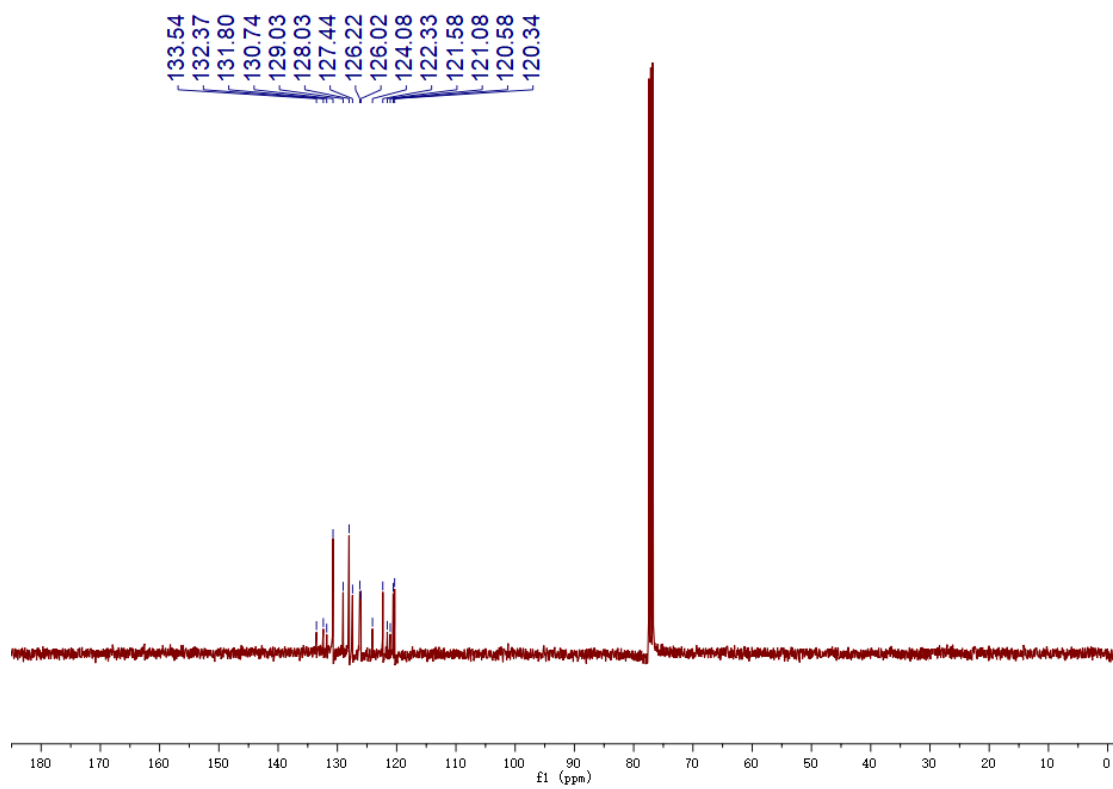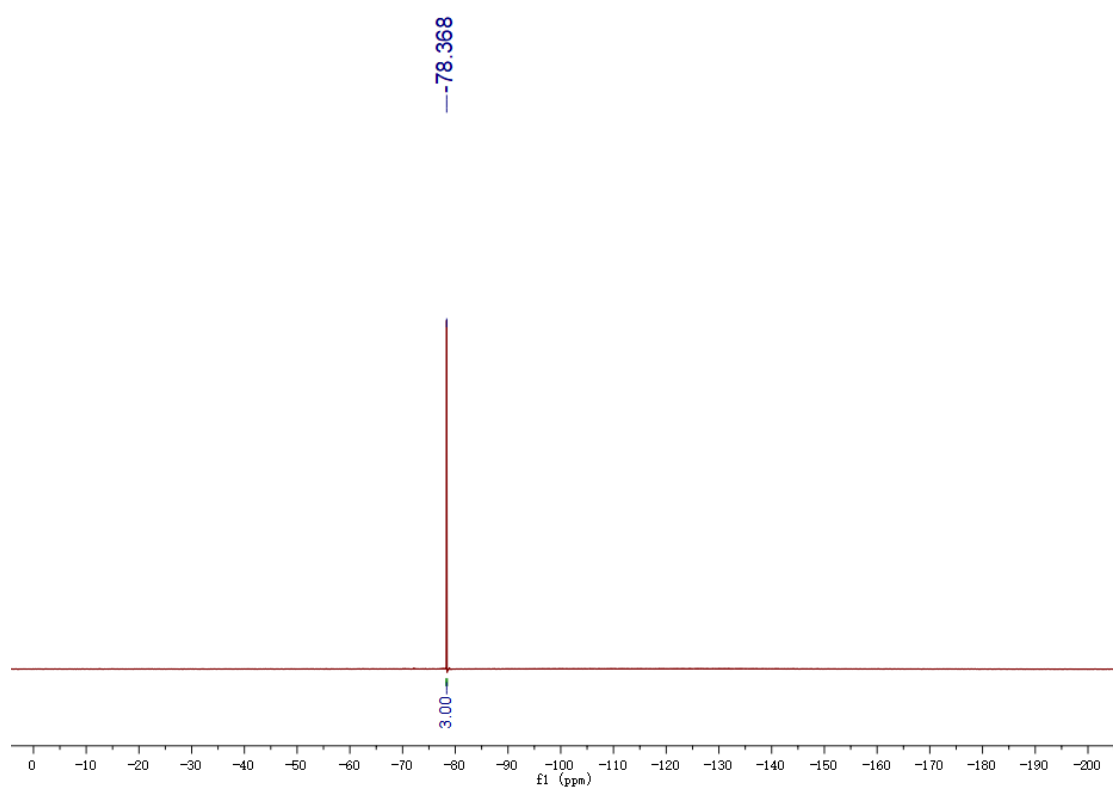

Supplement: d1ob00218j1.pdf [file d1ob00218j1.pdf]
